# Supplementary material
Source: HighWire-hosted journal article supplement (http://molpharm.aspetjournals.org/highwire/filestream/76840/field_highwire_adjunct_files/0/Suppl-Table1.pdf)
Supplement: Suppl-Table1.pdf [file Suppl-Table1.pdf]

Amurensin G, a potent natural SIRT1 inhibitor, rescues doxorubicin responsiveness via down-regulation of multidrug resistance 1. Oh WK, Cho KB, Hien TT, Kim TH, Kim HS, Dao TT, Han HK, Kwon SM, Ahn SG, Yoon JH, Kim TH, Kim YG, Kang KW. *Molecular Pharmacology*

**Table 1. 1820 plant extracts list**

|         | ID number | Bar Code                   | Weight<br>(Ave±SD) | DMSO<br>amounts | Total<br>Volume |     |
|---------|-----------|----------------------------|--------------------|-----------------|-----------------|-----|
|         | IPE0001   | <a href="#">FBM001-001</a> | PBCN10088          | 4.7             | 117.5           | 235 |
| WPE0001 | IPE0002   | <a href="#">FBM001-002</a> | PBCN10011          | 5.8             | 145             | 290 |
|         | IPE0003   | <a href="#">FBM001-003</a> | PBCN10094          | 6.5             | 162.5           | 325 |
|         | IPE0004   | <a href="#">FBM001-004</a> | PBCN10168          | 5.8             | 145             | 290 |
| WPE0002 | IPE0005   | <a href="#">FBM001-005</a> | PBCN10120          | 4.0             | 100             | 200 |
|         | IPE0006   | <a href="#">FBM001-006</a> | PBCN10059          | 7.7             | 192.5           | 385 |
|         | IPE0007   | <a href="#">FBM001-007</a> | PBCN10140          | 9.1             | 227.5           | 455 |
| WPE0003 | IPE0008   | <a href="#">FBM001-008</a> | PBCN10194          | 7.9             | 197.5           | 395 |
|         | IPE0009   | <a href="#">FBM001-009</a> | PBCN10167          | 3.8             | 95              | 190 |
|         | IPE0010   | <a href="#">FBM001-010</a> | PBCN10012          | 4.4             | 110             | 220 |
| WPE0004 | IPE0011   | <a href="#">FBM001-011</a> | PBCN10074          | 5.0             | 125             | 250 |
|         | IPE0012   | <a href="#">FBM001-012</a> | PBCN10014          | 4.9             | 122.5           | 245 |
|         | IPE0013   | <a href="#">FBM001-013</a> | PBCN10137          | 8.3             | 207.5           | 415 |
| WPE0005 | IPE0014   | <a href="#">FBM001-014</a> | PBCN10066          | 10.0            | 250             | 500 |
|         | IPE0015   | <a href="#">FBM001-015</a> | PBCN10114          | 6.2             | 155             | 310 |
|         | IPE0016   | <a href="#">FBM001-016</a> | PBCN10001          | 13.0            | 325             | 650 |
| WPE0006 | IPE0017   | <a href="#">FBM001-017</a> | PBCN10101          | 14.1            | 352.5           | 705 |
|         | IPE0018   | <a href="#">FBM001-018</a> | PBCN10032          | 6.1             | 152.5           | 305 |
|         | IPE0019   | <a href="#">FBM001-019</a> | PBCN10108          | 5.4             | 135             | 270 |
| WPE0007 | IPE0020   | <a href="#">FBM001-020</a> | PBCN10178          | 3.7             | 92.5            | 185 |
|         | IPE0021   | <a href="#">FBM001-021</a> | PBCN10122          | 4.3             | 107.5           | 215 |
|         | IPE0022   | <a href="#">FBM001-022</a> | PBCN10197          | 3.2             | 80              | 160 |
| WPE0008 | IPE0023   | <a href="#">FBM001-023</a> | PBCN10020          | 5.1             | 127.5           | 255 |
|         | IPE0024   | <a href="#">FBM001-024</a> | PBCN10155          | 3.8             | 95              | 190 |
|         | IPE0025   | <a href="#">FBM001-025</a> | PBCN10061          | 6.9             | 172.5           | 345 |
| WPE0009 | IPE0026   | <a href="#">FBM001-026</a> | PBCN10060          | 8.1             | 202.5           | 405 |
|         | IPE0027   | <a href="#">FBM001-027</a> | PBCN10013          | 4.3             | 107.5           | 215 |
|         | IPE0028   | <a href="#">FBM001-028</a> | PBCN10148          | 5.9             | 147.5           | 295 |
| WPE0010 | IPE0029   | <a href="#">FBM001-029</a> | PBCN10069          | 5.8             | 145             | 290 |
|         | IPE0030   | <a href="#">FBM001-030</a> | PBCN10102          | 4.9             | 122.5           | 245 |
|         | IPE0031   | <a href="#">FBM001-031</a> | PBCN10043          | 5.0             | 125             | 250 |
| WPE0011 | IPE0032   | <a href="#">FBM001-032</a> | PBCN10023          | 7.5             | 187.5           | 375 |
|         | IPE0033   | <a href="#">FBM001-033</a> | PBCN10050          | 6.6             | 165             | 330 |

|         |         |                            |           |      |       |     |
|---------|---------|----------------------------|-----------|------|-------|-----|
|         | IPE0034 | <a href="#">FBM001-034</a> | PBCN10062 | 5.5  | 137.5 | 275 |
| WPE0012 | IPE0035 | <a href="#">FBM001-035</a> | PBCN10010 | 5.5  | 137.5 | 275 |
|         | IPE0036 | <a href="#">FBM001-036</a> | PBCN10093 | 9.9  | 247.5 | 495 |
|         | IPE0037 | <a href="#">FBM001-037</a> | PBCN10077 | 6.4  | 160   | 320 |
| WPE0013 | IPE0038 | <a href="#">FBM001-038</a> | PBCN10016 | 13.5 | 337.5 | 675 |
|         | IPE0039 | <a href="#">FBM001-039</a> | PBCN10100 | 6.9  | 172.5 | 345 |
|         | IPE0040 | <a href="#">FBM001-040</a> | PBCN10127 | 5.1  | 127.5 | 255 |
| WPE0014 | IPE0041 | <a href="#">FBM001-041</a> | PBCN10198 | 4.5  | 112.5 | 225 |
|         | IPE0042 | <a href="#">FBM001-042</a> | PBCN10166 | 7.7  | 192.5 | 385 |
|         | IPE0043 | <a href="#">FBM001-043</a> | PBCN10175 | 4.6  | 115   | 230 |
| WPE0015 | IPE0044 | <a href="#">FBM001-044</a> | PBCN10029 | 5.1  | 127.5 | 255 |
|         | IPE0045 | <a href="#">FBM001-045</a> | PBCN10037 | 5.9  | 147.5 | 295 |
|         | IPE0046 | <a href="#">FBM001-046</a> | PBCN10185 | 4.8  | 120   | 240 |
| WPE0016 | IPE0047 | <a href="#">FBM001-047</a> | PBCN10030 | 5.6  | 140   | 280 |
|         | IPE0048 | <a href="#">FBM001-048</a> | PBCN10084 | 7.5  | 187.5 | 375 |
|         | IPE0049 | <a href="#">FBM001-049</a> | PBCN10123 | 4.9  | 122.5 | 245 |
| WPE0017 | IPE0050 | <a href="#">FBM001-050</a> | PBCN10111 | 4.2  | 105   | 210 |
|         | IPE0051 | <a href="#">FBM001-051</a> | PBCN10181 | 9.2  | 230   | 460 |
|         | IPE0052 | <a href="#">FBM001-052</a> | PBCN10076 | 4.3  | 107.5 | 215 |
| WPE0018 | IPE0053 | <a href="#">FBM001-053</a> | PBCN10171 | 5.7  | 142.5 | 285 |
|         | IPE0054 | <a href="#">FBM001-054</a> | PBCN10031 | 5.5  | 137.5 | 275 |
|         | IPE0055 | <a href="#">FBM001-055</a> | PBCN10164 | 5.5  | 137.5 | 275 |
| WPE0019 | IPE0056 | <a href="#">FBM001-056</a> | PBCN10063 | 5.3  | 132.5 | 265 |
|         | IPE0057 | <a href="#">FBM001-057</a> | PBCN10184 | 5.5  | 137.5 | 275 |
|         | IPE0058 | <a href="#">FBM001-058</a> | PBCN10097 | 6.4  | 160   | 320 |
| WPE0020 | IPE0059 | <a href="#">FBM001-059</a> | PBCN10053 | 4.0  | 100   | 200 |
|         | IPE0060 | <a href="#">FBM001-060</a> | PBCN10028 | 3.1  | 77.5  | 155 |
|         | IPE0061 | <a href="#">FBM001-061</a> | PBCN10160 | 3.0  | 75    | 150 |
| WPE0021 | IPE0062 | <a href="#">FBM001-062</a> | PBCN10186 | 8.4  | 210   | 420 |
|         | IPE0063 | <a href="#">FBM001-063</a> | PBCN10047 | 4.4  | 110   | 220 |
|         | IPE0064 | <a href="#">FBM001-064</a> | PBCN10196 | 4.5  | 112.5 | 225 |
| WPE0022 | IPE0065 | <a href="#">FBM001-065</a> | PBCN10057 | 5.9  | 147.5 | 295 |
|         | IPE0066 | <a href="#">FBM001-066</a> | PBCN10051 | 5.8  | 145   | 290 |
|         | IPE0067 | <a href="#">FBM001-067</a> | PBCN10107 | 4.9  | 122.5 | 245 |
| WPE0023 | IPE0068 | <a href="#">FBM001-068</a> | PBCN10163 | 14.6 | 365   | 730 |
|         | IPE0069 | <a href="#">FBM001-069</a> | PBCN10191 | 5.6  | 140   | 280 |
|         | IPE0070 | <a href="#">FBM001-070</a> | PBCN10109 |      | 0     | 0   |
| WPE0024 | IPE0071 | <a href="#">FBM001-071</a> | PBCN10091 | 6.0  | 150   | 300 |
|         | IPE0072 | <a href="#">FBM001-072</a> | PBCN10162 | 2.1  | 52.5  | 105 |

|         |         |                            |           |      |       |     |
|---------|---------|----------------------------|-----------|------|-------|-----|
|         | IPE0073 | <a href="#">FBM001-073</a> | PBCN10147 | 3.3  | 82.5  | 165 |
| WPE0025 | IPE0074 | <a href="#">FBM001-074</a> | PBCN10087 | 7.2  | 180   | 360 |
|         | IPE0075 | <a href="#">FBM001-075</a> | PBCN10159 | 12.6 | 315   | 630 |
|         | IPE0076 | <a href="#">FBM001-076</a> | PBCN10199 | 4.7  | 117.5 | 235 |
| WPE0026 | IPE0077 | <a href="#">FBM001-077</a> | PBCN10161 | 3.4  | 85    | 170 |
|         | IPE0078 | <a href="#">FBM001-078</a> | PBCN10151 | 11.6 | 290   | 580 |
|         | IPE0079 | <a href="#">FBM001-079</a> | PBCN10110 | 3.9  | 97.5  | 195 |
| WPE0027 | IPE0080 | <a href="#">FBM001-080</a> | PBCN10141 | 7.2  | 180   | 360 |
|         | IPE0081 | <a href="#">FBM001-081</a> | PBCN10121 | 4.8  | 120   | 240 |
|         | IPE0082 | <a href="#">FBM001-082</a> | PBCN10193 | 7.5  | 187.5 | 375 |
| WPE0028 | IPE0083 | <a href="#">FBM001-083</a> | PBCN10131 | 3.3  | 82.5  | 165 |
|         | IPE0084 | <a href="#">FBM001-084</a> | PBCN10187 | 5.8  | 145   | 290 |
|         | IPE0085 | <a href="#">FBM001-085</a> | PBCN10135 | 4.0  | 100   | 200 |
| WPE0029 | IPE0086 | <a href="#">FBM001-086</a> | PBCN10003 | 3.7  | 92.5  | 185 |
|         | IPE0087 | <a href="#">FBM001-087</a> | PBCN10015 | 4.4  | 110   | 220 |
|         | IPE0088 | <a href="#">FBM001-088</a> | PBCN10021 | 6.5  | 162.5 | 325 |
| WPE0030 | IPE0089 | <a href="#">FBM001-089</a> | PBCN10192 | 3.4  | 85    | 170 |
|         | IPE0090 | <a href="#">FBM001-090</a> | PBCN10190 | 4.0  | 100   | 200 |
|         | IPE0091 | <a href="#">FBM001-091</a> | PBCN10154 | 4.1  | 102.5 | 205 |
| WPE0031 | IPE0092 | <a href="#">FBM001-092</a> | PBCN10150 | 3.5  | 87.5  | 175 |
|         | IPE0093 | <a href="#">FBM001-093</a> | PBCN10126 | 4.4  | 110   | 220 |
|         | IPE0094 | <a href="#">FBM001-094</a> | PBCN10172 | 4.7  | 117.5 | 235 |
| WPE0032 | IPE0095 | <a href="#">FBM001-095</a> | PBCN10042 | 8.6  | 215   | 430 |
|         | IPE0096 | <a href="#">FBM001-096</a> | PBCN10092 | 5.9  | 147.5 | 295 |
|         | IPE0097 | <a href="#">FBM001-097</a> | PBCN10189 | 4.3  | 107.5 | 215 |
| WPE0033 | IPE0098 | <a href="#">FBM001-098</a> | PBCN10130 | 2.7  | 67.5  | 135 |
|         | IPE0099 | <a href="#">FBM001-099</a> | PBCN10055 | 3.5  | 87.5  | 175 |
|         | IPE0100 | <a href="#">FBM001-100</a> | PBCN10195 | 6.0  | 150   | 300 |
| WPE0034 |         | —                          |           |      |       |     |
|         | IPE0101 | <a href="#">FBM002-001</a> | PBPE10039 | 10.9 | 272.5 | 545 |
|         | IPE0102 | <a href="#">FBM002-002</a> | PBPE10147 | 9.9  | 247.5 | 495 |
| WPE0035 | IPE0103 | <a href="#">FBM002-003</a> | PBPE10010 | 6.4  | 160   | 320 |
|         | IPE0104 | <a href="#">FBM002-004</a> | PBPE10035 | 10.7 | 267.5 | 535 |
|         | IPE0105 | <a href="#">FBM002-005</a> | PBPE10103 | 6.2  | 155   | 310 |
| WPE0036 | IPE0106 | <a href="#">FBM002-006</a> | PBPE10187 | 9.9  | 247.5 | 495 |
|         | IPE0107 | <a href="#">FBM002-007</a> | PBPE10110 | 10.6 | 265   | 530 |
|         | IPE0108 | <a href="#">FBM002-008</a> | PBPE10014 | 6.7  | 167.5 | 335 |
| WPE0037 | IPE0109 | <a href="#">FBM002-009</a> | PBPE10121 | 7.6  | 190   | 380 |
|         | IPE0110 | <a href="#">FBM002-010</a> | PBPE10141 | 7.0  | 175   | 350 |

|         |         |                            |           |      |       |     |
|---------|---------|----------------------------|-----------|------|-------|-----|
|         | IPE0111 | <a href="#">FBM002-011</a> | PBPE10151 | 6.6  | 165   | 330 |
| WPE0038 | IPE0112 | <a href="#">FBM002-012</a> | PBPE10172 | 11.0 | 275   | 550 |
|         | IPE0113 | <a href="#">FBM002-013</a> | PBPE10132 | 11.4 | 285   | 570 |
|         | IPE0114 | <a href="#">FBM002-014</a> | PBPE10128 | 10.8 | 270   | 540 |
| WPE0039 | IPE0115 | <a href="#">FBM002-015</a> | PBPE10167 | 8.8  | 220   | 440 |
|         | IPE0116 | <a href="#">FBM002-016</a> | PBPE10126 | 8.6  | 215   | 430 |
|         | IPE0117 | <a href="#">FBM002-017</a> | PBPE10192 | 7.6  | 190   | 380 |
| WPE0040 | IPE0118 | <a href="#">FBM002-018</a> | PBPE10025 | 9.8  | 245   | 490 |
|         | IPE0119 | <a href="#">FBM002-019</a> | PBPE10038 | 6.3  | 157.5 | 315 |
|         | IPE0120 | <a href="#">FBM002-020</a> | PBPE10185 | 7.9  | 197.5 | 395 |
| WPE0041 | IPE0121 | <a href="#">FBM002-021</a> | PBPE10168 | 8.8  | 220   | 440 |
|         | IPE0122 | <a href="#">FBM002-022</a> | PBPE10130 | 10.0 | 250   | 500 |
|         | IPE0123 | <a href="#">FBM002-023</a> | PBPE10164 | 6.2  | 155   | 310 |
| WPE0042 | IPE0124 | <a href="#">FBM002-024</a> | PBPE10003 | 9.6  | 240   | 480 |
|         | IPE0125 | <a href="#">FBM002-025</a> | PBPE10157 | 9.4  | 235   | 470 |
|         | IPE0126 | <a href="#">FBM002-026</a> | PBPE10166 | 8.7  | 217.5 | 435 |
| WPE0043 | IPE0127 | <a href="#">FBM002-027</a> | PBPE10136 | 8.0  | 200   | 400 |
|         | IPE0128 | <a href="#">FBM002-028</a> | PBPE10024 | 6.9  | 172.5 | 345 |
|         | IPE0129 | <a href="#">FBM002-029</a> | PBPE10200 | 11.6 | 290   | 580 |
| WPE0044 | IPE0130 | <a href="#">FBM002-030</a> | PBPE10104 | 8.6  | 215   | 430 |
|         | IPE0131 | <a href="#">FBM002-031</a> | PBPE10154 | 10.6 | 265   | 530 |
|         | IPE0132 | <a href="#">FBM002-032</a> | PBPE10123 | 6.1  | 152.5 | 305 |
| WPE0045 | IPE0133 | <a href="#">FBM002-033</a> | PBPE10026 | 12.7 | 317.5 | 635 |
|         | IPE0134 | <a href="#">FBM002-034</a> | PBPE10135 | 8.2  | 205   | 410 |
|         | IPE0135 | <a href="#">FBM002-035</a> | PBPE10111 | 6.7  | 167.5 | 335 |
| WPE0046 | IPE0136 | <a href="#">FBM002-036</a> | PBPE10125 | 5.7  | 142.5 | 285 |
|         | IPE0137 | <a href="#">FBM002-037</a> | PBPE10023 | 7.7  | 192.5 | 385 |
|         | IPE0138 | <a href="#">FBM002-038</a> | PBPE10162 | 13.1 | 327.5 | 655 |
| WPE0047 | IPE0139 | <a href="#">FBM002-039</a> | PBPE10007 | 7.4  | 185   | 370 |
|         | IPE0140 | <a href="#">FBM002-040</a> | PBPE10173 | 8.8  | 220   | 440 |
|         | IPE0141 | <a href="#">FBM002-041</a> | PBPE10127 | 7.6  | 190   | 380 |
| WPE0048 | IPE0142 | <a href="#">FBM002-042</a> | PBPE10105 | 10.1 | 252.5 | 505 |
|         | IPE0143 | <a href="#">FBM002-043</a> | PBPE10011 | 5.7  | 142.5 | 285 |
|         | IPE0144 | <a href="#">FBM002-044</a> | PBPE10106 | 10.5 | 262.5 | 525 |
| WPE0049 | IPE0145 | <a href="#">FBM002-045</a> | PBPE10107 | 8.1  | 202.5 | 405 |
|         | IPE0146 | <a href="#">FBM002-046</a> | PBPE10153 | 11.6 | 290   | 580 |
|         | IPE0147 | <a href="#">FBM002-047</a> | PBPE10183 | 7.1  | 177.5 | 355 |
| WPE0050 | IPE0148 | <a href="#">FBM002-048</a> | PBPE10143 | 7.8  | 195   | 390 |
|         | IPE0149 | <a href="#">FBM002-049</a> | PBPE10194 | 8.2  | 205   | 410 |

|         |         |                            |           |      |       |     |
|---------|---------|----------------------------|-----------|------|-------|-----|
|         | IPE0150 | <a href="#">FBM002-050</a> | PBPE10139 | 8.2  | 205   | 410 |
| WPE0051 | IPE0151 | <a href="#">FBM002-051</a> | PBPE10019 | 9.1  | 227.5 | 455 |
|         | IPE0152 | <a href="#">FBM002-052</a> | PBPE10005 | 7.8  | 195   | 390 |
|         | IPE0153 | <a href="#">FBM002-053</a> | PBPE10181 | 6.4  | 160   | 320 |
| WPE0052 | IPE0154 | <a href="#">FBM002-054</a> | PBPE10109 | 7.1  | 177.5 | 355 |
|         | IPE0155 | <a href="#">FBM002-055</a> | PBPE10199 | 17.0 | 425   | 850 |
|         | IPE0156 | <a href="#">FBM002-056</a> | PBPE10176 | 5.3  | 132.5 | 265 |
| WPE0053 | IPE0157 | <a href="#">FBM002-057</a> | PBPE10144 | 8.8  | 220   | 440 |
|         | IPE0158 | <a href="#">FBM002-058</a> | PBPE10182 | 6.4  | 160   | 320 |
|         | IPE0159 | <a href="#">FBM002-059</a> | PBPE10140 | 6.8  | 170   | 340 |
| WPE0054 | IPE0160 | <a href="#">FBM002-060</a> | PBPE10020 | 8.1  | 202.5 | 405 |
|         | IPE0161 | <a href="#">FBM002-061</a> | PBPE10161 | 10.7 | 267.5 | 535 |
|         | IPE0162 | <a href="#">FBM002-062</a> | PBPE10175 | 10.0 | 250   | 500 |
| WPE0055 | IPE0163 | <a href="#">FBM002-063</a> | PBPE10191 | 6.2  | 155   | 310 |
|         | IPE0164 | <a href="#">FBM002-064</a> | PBPE10012 | 9.5  | 237.5 | 475 |
|         | IPE0165 | <a href="#">FBM002-065</a> | PBPE10033 | 8.3  | 207.5 | 415 |
| WPE0056 | IPE0166 | <a href="#">FBM002-066</a> | PBPE10163 | 7.3  | 182.5 | 365 |
|         | IPE0167 | <a href="#">FBM002-067</a> | PBPE10198 | 9.3  | 232.5 | 465 |
|         | IPE0168 | <a href="#">FBM002-068</a> | PBPE10002 | 11.2 | 280   | 560 |
| WPE0057 | IPE0169 | <a href="#">FBM002-069</a> | PBPE10146 | 13.3 | 332.5 | 665 |
|         | IPE0170 | <a href="#">FBM002-070</a> | PBPE10159 | 10.3 | 257.5 | 515 |
|         | IPE0171 | <a href="#">FBM002-071</a> | PBPE10169 | 8.8  | 220   | 440 |
| WPE0058 | IPE0172 | <a href="#">FBM002-072</a> | PBPE10180 | 8.9  | 222.5 | 445 |
|         | IPE0173 | <a href="#">FBM002-073</a> | PBPE10114 | 5.9  | 147.5 | 295 |
|         | IPE0174 | <a href="#">FBM002-074</a> | PBPE10196 | 8.1  | 202.5 | 405 |
| WPE0059 | IPE0175 | <a href="#">FBM002-075</a> | PBPE10013 | 7.8  | 195   | 390 |
|         | IPE0176 | <a href="#">FBM002-076</a> | PBPE10142 | 10.9 | 272.5 | 545 |
|         | IPE0177 | <a href="#">FBM002-077</a> | PBPE10004 | 10.7 | 267.5 | 535 |
| WPE0060 | IPE0178 | <a href="#">FBM002-078</a> | PBPE10032 | 10.2 | 255   | 510 |
|         | IPE0179 | <a href="#">FBM002-079</a> | PBPE10197 | 13.1 | 327.5 | 655 |
|         | IPE0180 | <a href="#">FBM002-080</a> | PBPE10184 | 10.0 | 250   | 500 |
| WPE0061 | IPE0181 | <a href="#">FBM002-081</a> | PBPE10152 | 10.7 | 267.5 | 535 |
|         | IPE0182 | <a href="#">FBM002-082</a> | PBPE10018 | 7.1  | 177.5 | 355 |
|         | IPE0183 | <a href="#">FBM002-083</a> | PBPE10179 | 8.6  | 215   | 430 |
| WPE0062 | IPE0184 | <a href="#">FBM002-084</a> | PBPE10174 | 7.5  | 187.5 | 375 |
|         | IPE0185 | <a href="#">FBM002-085</a> | PBPE10006 | 4.4  | 110   | 220 |
|         | IPE0186 | <a href="#">FBM002-086</a> | PBPE10027 | 7.0  | 175   | 350 |
| WPE0063 | IPE0187 | <a href="#">FBM002-087</a> | PBPE10145 | 6.4  | 160   | 320 |
|         | IPE0188 | <a href="#">FBM002-088</a> | PBPE10156 | 9.7  | 242.5 | 485 |

|         |         |                            |           |      |       |     |
|---------|---------|----------------------------|-----------|------|-------|-----|
|         | IPE0189 | <a href="#">FBM002-089</a> | PBPE10131 | 12.8 | 320   | 640 |
| WPE0064 | IPE0190 | <a href="#">FBM002-090</a> | PBPE10124 | 5.1  | 127.5 | 255 |
|         | IPE0191 | <a href="#">FBM002-091</a> | PBPE10008 | 7.5  | 187.5 | 375 |
|         | IPE0192 | <a href="#">FBM002-092</a> | PBPE10009 | 9.4  | 235   | 470 |
| WPE0065 | IPE0193 | <a href="#">FBM002-093</a> | PBPE10022 | 8.1  | 202.5 | 405 |
|         | IPE0194 | <a href="#">FBM002-094</a> | PBPE10028 | 6.5  | 162.5 | 325 |
|         | IPE0195 | <a href="#">FBM002-095</a> | PBPE10112 | 7.9  | 197.5 | 395 |
| WPE0066 | IPE0196 | <a href="#">FBM002-096</a> | PBPE10170 | 5.3  | 132.5 | 265 |
|         | IPE0197 | <a href="#">FBM002-097</a> | PBPE10171 | 7.6  | 190   | 380 |
|         | IPE0198 | <a href="#">FBM002-098</a> | PBPE10149 |      | 0     | 0   |
| WPE0067 | IPE0199 | <a href="#">FBM002-099</a> | PBPE10165 | 10.0 | 250   | 500 |
|         | IPE0200 | <a href="#">FBM002-100</a> | PBPE10122 | 14.6 | 365   | 730 |
|         | IPE0201 | <a href="#">FBM003-001</a> | PBPE10001 | 4.3  | 107.5 | 215 |
| WPE0068 | IPE0202 | <a href="#">FBM003-002</a> | PBPE10080 | 3.5  | 87.5  | 175 |
|         | IPE0203 | <a href="#">FBM003-003</a> | PBPE10040 | 5.9  | 147.5 | 295 |
|         | IPE0204 | <a href="#">FBM003-004</a> | PBPE10113 | 5.5  | 137.5 | 275 |
| WPE0069 | IPE0205 | <a href="#">FBM003-005</a> | PBPE10063 | 5.6  | 140   | 280 |
|         | IPE0206 | <a href="#">FBM003-006</a> | PBPE10137 | 6.8  | 170   | 340 |
|         | IPE0207 | <a href="#">FBM003-007</a> | PBPE10070 | 9.6  | 240   | 480 |
| WPE0070 | IPE0208 | <a href="#">FBM003-008</a> | PBPE10067 | 6.1  | 152.5 | 305 |
|         | IPE0209 | <a href="#">FBM003-009</a> | PBPE10042 | 15.8 | 395   | 790 |
|         | IPE0210 | <a href="#">FBM003-010</a> | PBPE10036 | 10.3 | 257.5 | 515 |
| WPE0071 | IPE0211 | <a href="#">FBM003-011</a> | PBPE10062 | 7.6  | 190   | 380 |
|         | IPE0212 | <a href="#">FBM003-012</a> | PBPE10083 | 5.4  | 135   | 270 |
|         | IPE0213 | <a href="#">FBM003-013</a> | PBPE10077 | 10.4 | 260   | 520 |
| WPE0072 | IPE0214 | <a href="#">FBM003-014</a> | PBPE10045 | 11.9 | 297.5 | 595 |
|         | IPE0215 | <a href="#">FBM003-015</a> | PBPE10129 | 3.7  | 92.5  | 185 |
|         | IPE0216 | <a href="#">FBM003-016</a> | PBPE10064 | 8.4  | 210   | 420 |
| WPE0073 | IPE0217 | <a href="#">FBM003-017</a> | PBPE10084 | 4.4  | 110   | 220 |
|         | IPE0218 | <a href="#">FBM003-018</a> | PBPE10044 | 3.4  | 85    | 170 |
|         | IPE0219 | <a href="#">FBM003-019</a> | PBPE10081 | 7.0  | 175   | 350 |
| WPE0074 | IPE0220 | <a href="#">FBM003-020</a> | PBPE10148 | 7.5  | 187.5 | 375 |
|         | IPE0221 | <a href="#">FBM003-021</a> | PBPE10087 | 4.8  | 120   | 240 |
|         | IPE0222 | <a href="#">FBM003-022</a> | PBPE10076 | 6.6  | 165   | 330 |
| WPE0075 | IPE0223 | <a href="#">FBM003-023</a> | PBPE10079 | 8.7  | 217.5 | 435 |
|         | IPE0224 | <a href="#">FBM003-024</a> | PBPE10015 | 9.5  | 237.5 | 475 |
|         | IPE0225 | <a href="#">FBM003-025</a> | PBPE10057 | 8.1  | 202.5 | 405 |
| WPE0076 | IPE0226 | <a href="#">FBM003-026</a> | PBPE10093 | 11.4 | 285   | 570 |
|         | IPE0227 | <a href="#">FBM003-027</a> | PBPE10134 | 5.0  | 125   | 250 |

|         |         |                            |           |      |       |     |
|---------|---------|----------------------------|-----------|------|-------|-----|
|         | IPE0228 | <a href="#">FBM003-028</a> | PBPE10060 | 3.8  | 95    | 190 |
| WPE0077 | IPE0229 | <a href="#">FBM003-029</a> | PBPE10177 | 4.3  | 107.5 | 215 |
|         | IPE0230 | <a href="#">FBM003-030</a> | PBPE10061 | 9.2  | 230   | 460 |
|         | IPE0231 | <a href="#">FBM003-031</a> | PBPE10072 | 7.8  | 195   | 390 |
| WPE0078 | IPE0232 | <a href="#">FBM003-032</a> | PBPE10029 | 7.8  | 195   | 390 |
|         | IPE0233 | <a href="#">FBM003-033</a> | PBPE10178 | 7.1  | 177.5 | 355 |
|         | IPE0234 | <a href="#">FBM003-034</a> | PBPE10082 | 7.8  | 195   | 390 |
| WPE0079 | IPE0235 | <a href="#">FBM003-035</a> | PBPE10050 | 6.6  | 165   | 330 |
|         | IPE0236 | <a href="#">FBM003-036</a> | PBPE10031 | 6.3  | 157.5 | 315 |
|         | IPE0237 | <a href="#">FBM003-037</a> | PBPE10034 | 4.4  | 110   | 220 |
| WPE0080 | IPE0238 | <a href="#">FBM003-038</a> | PBPE10058 | 5.6  | 140   | 280 |
|         | IPE0239 | <a href="#">FBM003-039</a> | PBPE10068 | 6.4  | 160   | 320 |
|         | IPE0240 | <a href="#">FBM003-040</a> | PBPE10116 | 6.7  | 167.5 | 335 |
| WPE0081 | IPE0241 | <a href="#">FBM003-041</a> | PBPE10017 | 8.7  | 217.5 | 435 |
|         | IPE0242 | <a href="#">FBM003-042</a> | PBPE10094 | 4.6  | 115   | 230 |
|         | IPE0243 | <a href="#">FBM003-043</a> | PBPE10099 | 6.9  | 172.5 | 345 |
| WPE0082 | IPE0244 | <a href="#">FBM003-044</a> | PBPE10089 | 6.5  | 162.5 | 325 |
|         | IPE0245 | <a href="#">FBM003-045</a> | PBPE10092 | 4.0  | 100   | 200 |
|         | IPE0246 | <a href="#">FBM003-046</a> | PBPE10086 | 7.7  | 192.5 | 385 |
| WPE0083 | IPE0247 | <a href="#">FBM003-047</a> | PBPE10048 | 13.5 | 337.5 | 675 |
|         | IPE0248 | <a href="#">FBM003-048</a> | PBPE10101 | 9.3  | 232.5 | 465 |
|         | IPE0249 | <a href="#">FBM003-049</a> | PBPE10090 | 6.0  | 150   | 300 |
| WPE0084 | IPE0250 | <a href="#">FBM003-050</a> | PBPE10118 | 5.7  | 142.5 | 285 |
|         | IPE0251 | <a href="#">FBM003-051</a> | PBPE10065 | 6.8  | 170   | 340 |
|         | IPE0252 | <a href="#">FBM003-052</a> | PBPE10046 | 8.0  | 200   | 400 |
| WPE0085 | IPE0253 | <a href="#">FBM003-053</a> | PBPE10054 | 6.4  | 160   | 320 |
|         | IPE0254 | <a href="#">FBM003-054</a> | PBPE10030 | 9.7  | 242.5 | 485 |
|         | IPE0255 | <a href="#">FBM003-055</a> | PBPE10108 | 6.6  | 165   | 330 |
| WPE0086 | IPE0256 | <a href="#">FBM003-056</a> | PBPE10160 | 6.0  | 150   | 300 |
|         | IPE0257 | <a href="#">FBM003-057</a> | PBPE10051 | 3.3  | 82.5  | 165 |
|         | IPE0258 | <a href="#">FBM003-058</a> | PBPE10100 | 9.7  | 242.5 | 485 |
| WPE0087 | IPE0259 | <a href="#">FBM003-059</a> | PBPE10098 | 4.4  | 110   | 220 |
|         | IPE0260 | <a href="#">FBM003-060</a> | PBPE10186 | 10.7 | 267.5 | 535 |
|         | IPE0261 | <a href="#">FBM003-061</a> | PBPE10021 | 7.0  | 175   | 350 |
| WPE0088 | IPE0262 | <a href="#">FBM003-062</a> | PBPE10049 | 8.0  | 200   | 400 |
|         | IPE0263 | <a href="#">FBM003-063</a> | PBPE10193 | 9.8  | 245   | 490 |
|         | IPE0264 | <a href="#">FBM003-064</a> | PBPE10095 | 7.8  | 195   | 390 |
| WPE0089 | IPE0265 | <a href="#">FBM003-065</a> | PBPE10119 | 11.6 | 290   | 580 |
|         | IPE0266 | <a href="#">FBM003-066</a> | PBPE10120 | 7.4  | 185   | 370 |

|         |         |                            |           |      |       |     |
|---------|---------|----------------------------|-----------|------|-------|-----|
|         | IPE0267 | <a href="#">FBM003-067</a> | PBPE10133 | 9.2  | 230   | 460 |
| WPE0090 | IPE0268 | <a href="#">FBM003-068</a> | PBPE10158 | 10.0 | 250   | 500 |
|         | IPE0269 | <a href="#">FBM003-069</a> | PBPE10190 | 10.4 | 260   | 520 |
|         | IPE0270 | <a href="#">FBM003-070</a> | PBPE10102 | 4.4  | 110   | 220 |
| WPE0091 | IPE0271 | <a href="#">FBM003-071</a> | PBPE10097 | 8.3  | 207.5 | 415 |
|         | IPE0272 | <a href="#">FBM003-072</a> | PBPE10117 | 5.9  | 147.5 | 295 |
|         | IPE0273 | <a href="#">FBM003-073</a> | PBPE10016 | 10.7 | 267.5 | 535 |
| WPE0092 | IPE0274 | <a href="#">FBM003-074</a> | PBPE10047 | 6.1  | 152.5 | 305 |
|         | IPE0275 | <a href="#">FBM003-075</a> | PBPE10053 | 7.5  | 187.5 | 375 |
|         | IPE0276 | <a href="#">FBM003-076</a> | PBPE10074 | 5.5  | 137.5 | 275 |
| WPE0093 | IPE0277 | <a href="#">FBM003-077</a> | PBPE10189 | 9.0  | 225   | 450 |
|         | IPE0278 | <a href="#">FBM003-078</a> | PBPE10037 | 13.9 | 347.5 | 695 |
|         | IPE0279 | <a href="#">FBM003-079</a> | PBPE10041 | 6.4  | 160   | 320 |
| WPE0094 | IPE0280 | <a href="#">FBM003-080</a> | PBPE10155 | 7.3  | 182.5 | 365 |
|         | IPE0281 | <a href="#">FBM003-081</a> | PBPE10073 | 4.7  | 117.5 | 235 |
|         | IPE0282 | <a href="#">FBM003-082</a> | PBPE10195 | 8.9  | 222.5 | 445 |
| WPE0095 | IPE0283 | <a href="#">FBM003-083</a> | PBPE10056 | 12.3 | 307.5 | 615 |
|         | IPE0284 | <a href="#">FBM003-084</a> | PBPE10055 | 7.9  | 197.5 | 395 |
|         | IPE0285 | <a href="#">FBM003-085</a> | PBPE10115 | 5.8  | 145   | 290 |
| WPE0096 | IPE0286 | <a href="#">FBM003-086</a> | PBPE10052 | 5.8  | 145   | 290 |
|         | IPE0287 | <a href="#">FBM003-087</a> | PBPE10085 | 6.3  | 157.5 | 315 |
|         | IPE0288 | <a href="#">FBM003-088</a> | PBPE10138 | 8.2  | 205   | 410 |
| WPE0097 | IPE0289 | <a href="#">FBM003-089</a> | PBPE10091 | 7.6  | 190   | 380 |
|         | IPE0290 | <a href="#">FBM003-090</a> | PBPE10059 | 4.6  | 115   | 230 |
|         | IPE0291 | <a href="#">FBM003-091</a> | PBPE10043 | 4.0  | 100   | 200 |
| WPE0098 | IPE0292 | <a href="#">FBM003-092</a> | PBPE10096 | 7.0  | 175   | 350 |
|         | IPE0293 | <a href="#">FBM003-093</a> | PBPE10188 | 3.6  | 90    | 180 |
|         | IPE0294 | <a href="#">FBM003-094</a> | PBPE10066 | 7.9  | 197.5 | 395 |
| WPE0099 | IPE0295 | <a href="#">FBM003-095</a> | PBPE10069 | 5.1  | 127.5 | 255 |
|         | IPE0296 | <a href="#">FBM003-096</a> | PBPE10071 | 10.1 | 252.5 | 505 |
|         | IPE0297 | <a href="#">FBM003-097</a> | PBPE10075 | 7.2  | 180   | 360 |
| WPE0100 | IPE0298 | <a href="#">FBM003-098</a> | PBPE10150 | 7.5  | 187.5 | 375 |
|         | IPE0299 | <a href="#">FBM003-099</a> | PBPE10078 | 6.1  | 152.5 | 305 |
|         | IPE0300 | <a href="#">FBM003-100</a> | PBPE10088 | 6.7  | 167.5 | 335 |
| WPE0101 | IPE0301 | <a href="#">FBM004-001</a> | PBCN10170 | 4.0  | 100   | 200 |
|         | IPE0302 | <a href="#">FBM004-002</a> | PBCN10124 | 5.2  | 130   | 260 |
|         | IPE0303 | <a href="#">FBM004-003</a> | PBCN10072 | 3.1  | 77.5  | 155 |
| WPE0102 | IPE0304 | <a href="#">FBM004-004</a> | PBCN10153 | 1.8  | 45    | 90  |
|         | IPE0305 | <a href="#">FBM004-005</a> | PBCN10143 | 17.6 | 440   | 880 |



|         |         |                            |           |      |       |     |
|---------|---------|----------------------------|-----------|------|-------|-----|
|         | IPE0306 | <a href="#">FBM004-006</a> | PBCN10115 | 4.8  | 120   | 240 |
| WPE0103 | IPE0307 | <a href="#">FBM004-007</a> | PBCN10049 | 6.0  | 150   | 300 |
|         | IPE0308 | <a href="#">FBM004-008</a> | PBCN10125 | 4.6  | 115   | 230 |
|         | IPE0309 | <a href="#">FBM004-009</a> | PBCN10149 | 3.7  | 92.5  | 185 |
| WPE0104 | IPE0310 | <a href="#">FBM004-010</a> | PBCN10019 | 2.6  | 65    | 130 |
|         | IPE0311 | <a href="#">FBM004-011</a> | PBCN10138 | 4.8  | 120   | 240 |
|         | IPE0312 | <a href="#">FBM004-012</a> | PBCN10036 | 3.6  | 90    | 180 |
| WPE0105 | IPE0313 | <a href="#">FBM004-013</a> | PBCN10146 | 5.7  | 142.5 | 285 |
|         | IPE0314 | <a href="#">FBM004-014</a> | PBCN10177 | 12.2 | 305   | 610 |
|         | IPE0315 | <a href="#">FBM004-015</a> | PBCN10048 | 4.4  | 110   | 220 |
| WPE0106 | IPE0316 | <a href="#">FBM004-016</a> | PBCN10200 | 5.2  | 130   | 260 |
|         | IPE0317 | <a href="#">FBM004-017</a> | PBCN10129 | 3.9  | 97.5  | 195 |
|         | IPE0318 | <a href="#">FBM004-018</a> | PBCN10096 | 6.5  | 162.5 | 325 |
| WPE0107 | IPE0319 | <a href="#">FBM004-019</a> | PBCN10173 | 2.3  | 57.5  | 115 |
|         | IPE0320 | <a href="#">FBM004-020</a> | PBCN10034 | 8.5  | 212.5 | 425 |
|         | IPE0321 | <a href="#">FBM004-021</a> | PBCN10052 | 5.7  | 142.5 | 285 |
| WPE0108 | IPE0322 | <a href="#">FBM004-022</a> | PBCN10090 | 5.5  | 137.5 | 275 |
|         | IPE0323 | <a href="#">FBM004-023</a> | PBCN10113 | 5.0  | 125   | 250 |
|         | IPE0324 | <a href="#">FBM004-024</a> | PBCN10044 | 2.1  | 52.5  | 105 |
| WPE0109 | IPE0325 | <a href="#">FBM004-025</a> | PBCN10119 | 5.4  | 135   | 270 |
|         | IPE0326 | <a href="#">FBM004-026</a> | PBCN10157 | 3.1  | 77.5  | 155 |
|         | IPE0327 | <a href="#">FBM004-027</a> | PBCN10180 | 3.4  | 85    | 170 |
| WPE0110 | IPE0328 | <a href="#">FBM004-028</a> | PBCN10071 | 5.3  | 132.5 | 265 |
|         | IPE0329 | <a href="#">FBM004-029</a> | PBCN10117 | 3.9  | 97.5  | 195 |
|         | IPE0330 | <a href="#">FBM004-030</a> | PBCN10080 |      | 0     | 0   |
| WPE0111 | IPE0331 | <a href="#">FBM004-031</a> | PBCN10165 | 3.3  | 82.5  | 165 |
|         | IPE0332 | <a href="#">FBM004-032</a> | PBCN10099 | 4.1  | 102.5 | 205 |
|         | IPE0333 | <a href="#">FBM004-033</a> | PBCN10065 | 6.7  | 167.5 | 335 |
| WPE0112 | IPE0334 | <a href="#">FBM004-034</a> | PBCN10142 | 11.0 | 275   | 550 |
|         | IPE0335 | <a href="#">FBM004-035</a> | PBCN10085 | 8.5  | 212.5 | 425 |
|         | IPE0336 | <a href="#">FBM004-036</a> | PBCN10082 | 5.5  | 137.5 | 275 |
| WPE0113 | IPE0337 | <a href="#">FBM004-037</a> | PBCN10022 | 4.0  | 100   | 200 |
|         | IPE0338 | <a href="#">FBM004-038</a> | PBCN10073 | 4.0  | 100   | 200 |
|         | IPE0339 | <a href="#">FBM004-039</a> | PBCN10179 | 3.8  | 95    | 190 |
| WPE0114 | IPE0340 | <a href="#">FBM004-040</a> | PBCN10106 | 6.3  | 157.5 | 315 |
|         | IPE0341 | <a href="#">FBM004-041</a> | PBCN10008 | 4.0  | 100   | 200 |
|         | IPE0342 | <a href="#">FBM004-042</a> | PBCN10169 | 4.3  | 107.5 | 215 |
| WPE0115 | IPE0343 | <a href="#">FBM004-043</a> | PBCN10025 | 3.9  | 97.5  | 195 |
|         | IPE0344 | <a href="#">FBM004-044</a> | PBCN10017 | 3.7  | 92.5  | 185 |

|         |         |                            |           |      |       |     |
|---------|---------|----------------------------|-----------|------|-------|-----|
|         | IPE0345 | <a href="#">FBM004-045</a> | PBCN10183 | 7.4  | 185   | 370 |
| WPE0116 | IPE0346 | <a href="#">FBM004-046</a> | PBCN10058 | 7.6  | 190   | 380 |
|         | IPE0347 | <a href="#">FBM004-047</a> | PBCN10005 | 5.9  | 147.5 | 295 |
|         | IPE0348 | <a href="#">FBM004-048</a> | PBCN10136 | 5.1  | 127.5 | 255 |
| WPE0117 | IPE0349 | <a href="#">FBM004-049</a> | PBCN10068 | 4.9  | 122.5 | 245 |
|         | IPE0350 | <a href="#">FBM004-050</a> | PBCN10156 | 7.1  | 177.5 | 355 |
|         | IPE0351 | <a href="#">FBM004-051</a> | PBCN10132 | 12.8 | 320   | 640 |
| WPE0118 | IPE0352 | <a href="#">FBM004-052</a> | PBCN10035 | 2.9  | 72.5  | 145 |
|         | IPE0353 | <a href="#">FBM004-053</a> | PBCN10152 | 5.3  | 132.5 | 265 |
|         | IPE0354 | <a href="#">FBM004-054</a> | PBCN10007 | 3.9  | 97.5  | 195 |
| WPE0119 | IPE0355 | <a href="#">FBM004-055</a> | PBCN10105 | 3.9  | 97.5  | 195 |
|         | IPE0356 | <a href="#">FBM004-056</a> | PBCN10039 | 5.8  | 145   | 290 |
|         | IPE0357 | <a href="#">FBM004-057</a> | PBCN10078 | 3.6  | 90    | 180 |
| WPE0120 | IPE0358 | <a href="#">FBM004-058</a> | PBCN10081 | 4.2  | 105   | 210 |
|         | IPE0359 | <a href="#">FBM004-059</a> | PBCN10018 | 6.1  | 152.5 | 305 |
|         | IPE0360 | <a href="#">FBM004-060</a> | PBCN10041 | 3.3  | 82.5  | 165 |
| WPE0121 | IPE0361 | <a href="#">FBM004-061</a> | PBCN10104 | 4.8  | 120   | 240 |
|         | IPE0362 | <a href="#">FBM004-062</a> | PBCN10103 | 6.4  | 160   | 320 |
|         | IPE0363 | <a href="#">FBM004-063</a> | PBCN10070 | 5.4  | 135   | 270 |
| WPE0122 | IPE0364 | <a href="#">FBM004-064</a> | PBCN10176 | 17.0 | 425   | 850 |
|         | IPE0365 | <a href="#">FBM004-065</a> | PBCN10174 | 3.9  | 97.5  | 195 |
|         | IPE0366 | <a href="#">FBM004-066</a> | PBCN10038 | 5.5  | 137.5 | 275 |
| WPE0123 | IPE0367 | <a href="#">FBM004-067</a> | PBCN10095 | 5.1  | 127.5 | 255 |
|         | IPE0368 | <a href="#">FBM004-068</a> | PBCN10098 | 8.0  | 200   | 400 |
|         | IPE0369 | <a href="#">FBM004-069</a> | PBCN10033 | 8.9  | 222.5 | 445 |
| WPE0124 | IPE0370 | <a href="#">FBM004-070</a> | PBCN10139 | 6.1  | 152.5 | 305 |
|         | IPE0371 | <a href="#">FBM004-071</a> | PBCN10134 | 3.7  | 92.5  | 185 |
|         | IPE0372 | <a href="#">FBM004-072</a> | PBCN10027 |      | 0     | 0   |
| WPE0125 | IPE0373 | <a href="#">FBM004-073</a> | PBCN10086 | 11.0 | 275   | 550 |
|         | IPE0374 | <a href="#">FBM004-074</a> | PBCN10112 | 7.3  | 182.5 | 365 |
|         | IPE0375 | <a href="#">FBM004-075</a> | PBCN10040 | 5.5  | 137.5 | 275 |
| WPE0126 | IPE0376 | <a href="#">FBM004-076</a> | PBCN10128 | 3.8  | 95    | 190 |
|         | IPE0377 | <a href="#">FBM004-077</a> | PBCN10054 | 2.8  | 70    | 140 |
|         | IPE0378 | <a href="#">FBM004-078</a> | PBCN10182 | 5.5  | 137.5 | 275 |
| WPE0127 | IPE0379 | <a href="#">FBM004-079</a> | PBCN10002 | 5.6  | 140   | 280 |
|         | IPE0380 | <a href="#">FBM004-080</a> | PBCN10145 | 4.7  | 117.5 | 235 |
|         | IPE0381 | <a href="#">FBM004-081</a> | PBCN10133 | 3.2  | 80    | 160 |
| WPE0128 | IPE0382 | <a href="#">FBM004-082</a> | PBCN10046 | 4.3  | 107.5 | 215 |
|         | IPE0383 | <a href="#">FBM004-083</a> | PBCN10024 | 2.5  | 62.5  | 125 |

|         |         |                            |                  |            |       |     |
|---------|---------|----------------------------|------------------|------------|-------|-----|
|         | IPE0384 | <a href="#">FBM004-084</a> | PBCN10045        | 4.2        | 105   | 210 |
| WPE0129 | IPE0385 | <a href="#">FBM004-085</a> | PBCN10118        | 3.6        | 90    | 180 |
|         | IPE0386 | <a href="#">FBM004-086</a> | PBCN10089        | 10.6       | 265   | 530 |
|         | IPE0387 | <a href="#">FBM004-087</a> | PBCN10116        | 4.7        | 117.5 | 235 |
| WPE0130 | IPE0388 | <a href="#">FBM004-088</a> | PBCN10056        | 4.2        | 105   | 210 |
|         | IPE0389 | <a href="#">FBM004-089</a> | PBCN10026        | 4.7        | 117.5 | 235 |
|         | IPE0390 | <a href="#">FBM004-090</a> | PBCN10075        | 5.8        | 145   | 290 |
| WPE0131 | IPE0391 | <a href="#">FBM004-091</a> | <b>PBCN10079</b> | <b>5.2</b> | 130   | 260 |
|         | IPE0392 | <a href="#">FBM004-092</a> | PBCN10144        | 9.5        | 237.5 | 475 |
|         | IPE0393 | <a href="#">FBM004-093</a> | PBCN10006        | 7.2        | 180   | 360 |
| WPE0132 | IPE0394 | <a href="#">FBM004-094</a> | PBCN10067        | 6.1        | 152.5 | 305 |
|         | IPE0395 | <a href="#">FBM004-095</a> | PBCN10009        | 7.3        | 182.5 | 365 |
|         | IPE0396 | <a href="#">FBM004-096</a> | PBCN10083        | 5.2        | 130   | 260 |
| WPE0133 | IPE0397 | <a href="#">FBM004-097</a> | PBCN10158        | 4.0        | 100   | 200 |
|         | IPE0398 | <a href="#">FBM004-098</a> | PBCN10188        | 4.9        | 122.5 | 245 |
|         | IPE0399 | <a href="#">FBM004-099</a> | PBCN10064        | 6.4        | 160   | 320 |
| WPE0134 | IPE0400 | <a href="#">FBM004-100</a> | <b>PBCN10004</b> | <b>3.8</b> | 95    | 190 |
|         | IPE0401 | <a href="#">FBM005-001</a> | PBBR10001        | 4.9        | 122.5 | 245 |
|         | IPE0402 | <a href="#">FBM005-002</a> | PBBR10002        | 1.1        | 27.5  | 55  |
| WPE0135 | IPE0403 | <a href="#">FBM005-003</a> | PBBR10003        | 6.9        | 172.5 | 345 |
|         | IPE0404 | <a href="#">FBM005-004</a> | PBBR10004        | 2.2        | 55    | 110 |
|         | IPE0405 | <a href="#">FBM005-005</a> | PBBR10005        | 3.8        | 95    | 190 |
| WPE0136 | IPE0406 | <a href="#">FBM005-006</a> | PBBR10006        | 5.3        | 132.5 | 265 |
|         | IPE0407 | <a href="#">FBM005-007</a> | PBBR10007        | 1.7        | 42.5  | 85  |
|         | IPE0408 | <a href="#">FBM005-008</a> | PBBR10008        | 7.8        | 195   | 390 |
| WPE0137 | IPE0409 | <a href="#">FBM005-009</a> | PBBR10009        | 7.4        | 185   | 370 |
|         | IPE0410 | <a href="#">FBM005-010</a> | PBBR10010        | 10.0       | 250   | 500 |
|         | IPE0411 | <a href="#">FBM005-011</a> | PBBR10011        | 4.9        | 122.5 | 245 |
| WPE0138 | IPE0412 | <a href="#">FBM005-012</a> | PBBR10012        | 5.7        | 142.5 | 285 |
|         | IPE0413 | <a href="#">FBM005-013</a> | PBBR10013        | 6.7        | 167.5 | 335 |
|         | IPE0414 | <a href="#">FBM005-014</a> | PBBR10014        | 4.4        | 110   | 220 |
| WPE0139 | IPE0415 | <a href="#">FBM005-015</a> | PBBR10015        | 5.3        | 132.5 | 265 |
|         | IPE0416 | <a href="#">FBM005-016</a> | PBBR10016        | 2.9        | 72.5  | 145 |
|         | IPE0417 | <a href="#">FBM005-017</a> | PBBR10017        | 4.3        | 107.5 | 215 |
| WPE0140 | IPE0418 | <a href="#">FBM005-018</a> | PBBR10018        | 3.1        | 77.5  | 155 |
|         | IPE0419 | <a href="#">FBM005-019</a> | PBBR10019        | 5.3        | 132.5 | 265 |
|         | IPE0420 | <a href="#">FBM005-020</a> | PBBR10020        | 4.5        | 112.5 | 225 |
| WPE0141 | IPE0421 | <a href="#">FBM005-021</a> | PBBR10021        | 2.3        | 57.5  | 115 |
|         | IPE0422 | <a href="#">FBM005-022</a> | PBBR10022        | 3.8        | 95    | 190 |

|         |         |                            |           |      |       |     |
|---------|---------|----------------------------|-----------|------|-------|-----|
|         | IPE0423 | <a href="#">FBM005-023</a> | PBBR10023 | 5.1  | 127.5 | 255 |
| WPE0142 | IPE0424 | <a href="#">FBM005-024</a> | PBBR10024 | 3.4  | 85    | 170 |
|         | IPE0425 | <a href="#">FBM005-025</a> | PBBR10025 | 3.1  | 77.5  | 155 |
|         | IPE0426 | <a href="#">FBM005-026</a> | PBBR10026 | 5.4  | 135   | 270 |
| WPE0143 | IPE0427 | <a href="#">FBM005-027</a> | PBBR10027 | 6.4  | 160   | 320 |
|         | IPE0428 | <a href="#">FBM005-028</a> | PBBR10028 | 3.2  | 80    | 160 |
|         | IPE0429 | <a href="#">FBM005-029</a> | PBBR10029 | 4.6  | 115   | 230 |
| WPE0144 | IPE0430 | <a href="#">FBM005-030</a> | PBBR10030 | 4.8  | 120   | 240 |
|         | IPE0431 | <a href="#">FBM005-031</a> | PBBR10031 | 7.3  | 182.5 | 365 |
|         | IPE0432 | <a href="#">FBM005-032</a> | PBBR10032 | 4.9  | 122.5 | 245 |
| WPE0145 | IPE0433 | <a href="#">FBM005-033</a> | PBBR10033 | 10.1 | 252.5 | 505 |
|         | IPE0434 | <a href="#">FBM005-034</a> | PBBR10034 | 6.2  | 155   | 310 |
|         | IPE0435 | <a href="#">FBM005-035</a> | PBBR10035 | 6.8  | 170   | 340 |
| WPE0146 | IPE0436 | <a href="#">FBM005-036</a> | PBBR10036 | 5.1  | 127.5 | 255 |
|         | IPE0437 | <a href="#">FBM005-037</a> | PBBR10037 | 5.2  | 130   | 260 |
|         | IPE0438 | <a href="#">FBM005-038</a> | PBBR10038 | 6.2  | 155   | 310 |
| WPE0147 | IPE0439 | <a href="#">FBM005-039</a> | PBBR10039 | 1.9  | 47.5  | 95  |
|         | IPE0440 | <a href="#">FBM005-040</a> | PBBR10040 | 3.5  | 87.5  | 175 |
|         | IPE0441 | <a href="#">FBM005-041</a> | PBBR10041 | 6.8  | 170   | 340 |
| WPE0148 | IPE0442 | <a href="#">FBM005-042</a> | PBBR10042 | 2.7  | 67.5  | 135 |
|         | IPE0443 | <a href="#">FBM005-043</a> | PBBR10043 | 9.8  | 245   | 490 |
|         | IPE0444 | <a href="#">FBM005-044</a> | PBBR10044 | 4.3  | 107.5 | 215 |
| WPE0149 | IPE0445 | <a href="#">FBM005-045</a> | PBBR10045 | 5.6  | 140   | 280 |
|         | IPE0446 | <a href="#">FBM005-046</a> | PBBR10046 | 6.5  | 162.5 | 325 |
|         | IPE0447 | <a href="#">FBM005-047</a> | PBBR10047 | 7.1  | 177.5 | 355 |
| WPE0150 | IPE0448 | <a href="#">FBM005-048</a> | PBBR10048 | 10.9 | 272.5 | 545 |
|         | IPE0449 | <a href="#">FBM005-049</a> | PBBR10049 | 1.5  | 37.5  | 75  |
|         | IPE0450 | <a href="#">FBM005-050</a> | PBBR10050 | 3.4  | 85    | 170 |
| WPE0151 | IPE0451 | <a href="#">FBM005-051</a> | PBBR10051 | 7.6  | 190   | 380 |
|         | IPE0452 | <a href="#">FBM005-052</a> | PBBR10052 | 6.6  | 165   | 330 |
|         | IPE0453 | <a href="#">FBM005-053</a> | PBBR10053 | 10.4 | 260   | 520 |
| WPE0152 | IPE0454 | <a href="#">FBM005-054</a> | PBBR10054 | 5.6  | 140   | 280 |
|         | IPE0455 | <a href="#">FBM005-055</a> | PBBR10055 | 5.1  | 127.5 | 255 |
|         | IPE0456 | <a href="#">FBM005-056</a> | PBBR10056 | 6.0  | 150   | 300 |
| WPE0153 | IPE0457 | <a href="#">FBM005-057</a> | PBBR10057 | 4.2  | 105   | 210 |
|         | IPE0458 | <a href="#">FBM005-058</a> | PBBR10058 | 4.1  | 102.5 | 205 |
|         | IPE0459 | <a href="#">FBM005-059</a> | PBBR10059 | 5.5  | 137.5 | 275 |
| WPE0154 | IPE0460 | <a href="#">FBM005-060</a> | PBBR10060 | 3.5  | 87.5  | 175 |
|         | IPE0461 | <a href="#">FBM005-061</a> | PBBR10061 | 5.7  | 142.5 | 285 |

|         |         |                            |           |      |       |     |
|---------|---------|----------------------------|-----------|------|-------|-----|
|         | IPE0462 | <a href="#">FBM005-062</a> | PBBR10062 | 7.5  | 187.5 | 375 |
| WPE0155 | IPE0463 | <a href="#">FBM005-063</a> | PBBR10063 | 12.3 | 307.5 | 615 |
|         | IPE0464 | <a href="#">FBM005-064</a> | PBBR10064 | 9.2  | 230   | 460 |
|         | IPE0465 | <a href="#">FBM005-065</a> | PBBR10065 | 4.0  | 100   | 200 |
| WPE0156 | IPE0466 | <a href="#">FBM005-066</a> | PBBR10066 | 6.8  | 170   | 340 |
|         | IPE0467 | <a href="#">FBM005-067</a> | PBBR10067 | 3.6  | 90    | 180 |
|         | IPE0468 | <a href="#">FBM005-068</a> | PBBR10068 | 1.9  | 47.5  | 95  |
| WPE0157 | IPE0469 | <a href="#">FBM005-069</a> | PBBR10069 | 6.4  | 160   | 320 |
|         | IPE0470 | <a href="#">FBM005-070</a> | PBBR10070 | 4.3  | 107.5 | 215 |
|         | IPE0471 | <a href="#">FBM005-071</a> | PBBR10071 | 2.8  | 70    | 140 |
| WPE0158 | IPE0472 | <a href="#">FBM005-072</a> | PBBR10072 | 3.9  | 97.5  | 195 |
|         | IPE0473 | <a href="#">FBM005-073</a> | PBBR10073 | 3.7  | 92.5  | 185 |
|         | IPE0474 | <a href="#">FBM005-074</a> | PBBR10074 | 8.8  | 220   | 440 |
| WPE0159 | IPE0475 | <a href="#">FBM005-075</a> | PBBR10075 | 5.1  | 127.5 | 255 |
|         | IPE0476 | <a href="#">FBM005-076</a> | PBBR10076 | 14.1 | 352.5 | 705 |
|         | IPE0477 | <a href="#">FBM005-077</a> | PBBR10077 | 5.6  | 140   | 280 |
| WPE0160 | IPE0478 | <a href="#">FBM005-078</a> | PBBR10078 | 6.9  | 172.5 | 345 |
|         | IPE0479 | <a href="#">FBM005-079</a> | PBBR10079 | 11.3 | 282.5 | 565 |
|         | IPE0480 | <a href="#">FBM005-080</a> | PBBR10080 | 4.1  | 102.5 | 205 |
| WPE0161 | IPE0481 | <a href="#">FBM005-081</a> | PBBR10081 | 11.2 | 280   | 560 |
|         | IPE0482 | <a href="#">FBM005-082</a> | PBBR10082 | 4.8  | 120   | 240 |
|         | IPE0483 | <a href="#">FBM005-083</a> | PBBR10083 | 3.8  | 95    | 190 |
| WPE0162 | IPE0484 | <a href="#">FBM005-084</a> | PBBR10084 | 5.4  | 135   | 270 |
|         | IPE0485 | <a href="#">FBM005-085</a> | PBBR10085 | 7.1  | 177.5 | 355 |
|         | IPE0486 | <a href="#">FBM005-086</a> | PBBR10086 | 4.2  | 105   | 210 |
| WPE0163 | IPE0487 | <a href="#">FBM005-087</a> | PBBR10087 | 3.8  | 95    | 190 |
|         | IPE0488 | <a href="#">FBM005-088</a> | PBBR10088 | 2.5  | 62.5  | 125 |
|         | IPE0489 | <a href="#">FBM005-089</a> | PBBR10089 | 3.1  | 77.5  | 155 |
| WPE0164 | IPE0490 | <a href="#">FBM005-090</a> | PBBR10090 | 3.1  | 77.5  | 155 |
|         | IPE0491 | <a href="#">FBM005-091</a> | PBBR10091 | 2.0  | 50    | 100 |
|         | IPE0492 | <a href="#">FBM005-092</a> | PBBR10092 | 8.0  | 200   | 400 |
| WPE0165 | IPE0493 | <a href="#">FBM005-093</a> | PBBR10093 | 4.6  | 115   | 230 |
|         | IPE0494 | <a href="#">FBM005-094</a> | PBBR10094 | 5.8  | 145   | 290 |
|         | IPE0495 | <a href="#">FBM005-095</a> | PBBR10095 | 2.4  | 60    | 120 |
| WPE0166 | IPE0496 | <a href="#">FBM005-096</a> | PBBR10096 | 3.5  | 87.5  | 175 |
|         | IPE0497 | <a href="#">FBM005-097</a> | PBBR10097 | 3.5  | 87.5  | 175 |
|         | IPE0498 | <a href="#">FBM005-098</a> | PBBR10098 | 4.8  | 120   | 240 |
| WPE0167 | IPE0499 | <a href="#">FBM005-099</a> | PBBR10099 | 4.3  | 107.5 | 215 |
|         | IPE0500 | <a href="#">FBM005-100</a> | PBBR10100 | 2.4  | 60    | 120 |

|         |         |                            |           |      |       |     |
|---------|---------|----------------------------|-----------|------|-------|-----|
|         | IPE0501 | <a href="#">FBM006-001</a> | PBCN10215 | 9.8  | 245   | 490 |
| WPE0168 | IPE0502 | <a href="#">FBM006-002</a> | PBCN10234 | 12.0 | 300   | 600 |
|         | IPE0503 | <a href="#">FBM006-003</a> | PBCN10300 | 4.5  | 112.5 | 225 |
|         | IPE0504 | <a href="#">FBM006-004</a> | PBCN10315 | 5.7  | 142.5 | 285 |
| WPE0169 | IPE0505 | <a href="#">FBM006-005</a> | PBCN10355 | 7.9  | 197.5 | 395 |
|         | IPE0506 | <a href="#">FBM006-006</a> | PBCN10389 | 9.8  | 245   | 490 |
|         | IPE0507 | <a href="#">FBM006-007</a> | PBCN10360 | 4.2  | 105   | 210 |
| WPE0170 | IPE0508 | <a href="#">FBM006-008</a> | PBCN10353 | 7.4  | 185   | 370 |
|         | IPE0509 | <a href="#">FBM006-009</a> | PBCN10233 | 7.4  | 185   | 370 |
|         | IPE0510 | <a href="#">FBM006-010</a> | PBCN10273 | 4.1  | 102.5 | 205 |
| WPE0171 | IPE0511 | <a href="#">FBM006-011</a> | PBCN10278 | 6.2  | 155   | 310 |
|         | IPE0512 | <a href="#">FBM006-012</a> | PBCN10280 | 5.1  | 127.5 | 255 |
|         | IPE0513 | <a href="#">FBM006-013</a> | PBCN10235 | 5.1  | 127.5 | 255 |
| WPE0172 | IPE0514 | <a href="#">FBM006-014</a> | PBCN10316 | 4.8  | 120   | 240 |
|         | IPE0515 | <a href="#">FBM006-015</a> | PBCN10365 | 7.2  | 180   | 360 |
|         | IPE0516 | <a href="#">FBM006-016</a> | PBCN10294 | 4.0  | 100   | 200 |
| WPE0173 | IPE0517 | <a href="#">FBM006-017</a> | PBCN10260 | 9.6  | 240   | 480 |
|         | IPE0518 | <a href="#">FBM006-018</a> | PBCN10239 | 5.7  | 142.5 | 285 |
|         | IPE0519 | <a href="#">FBM006-019</a> | PBCN10213 | 4.1  | 102.5 | 205 |
| WPE0174 | IPE0520 | <a href="#">FBM006-020</a> | PBCN10289 | 8.3  | 207.5 | 415 |
|         | IPE0521 | <a href="#">FBM006-021</a> | PBCN10286 | 4.7  | 117.5 | 235 |
|         | IPE0522 | <a href="#">FBM006-022</a> | PBCN10298 | 12.5 | 312.5 | 625 |
| WPE0175 | IPE0523 | <a href="#">FBM006-023</a> | PBCN10348 | 6.0  | 150   | 300 |
|         | IPE0524 | <a href="#">FBM006-024</a> | PBCN10249 | 9.5  | 237.5 | 475 |
|         | IPE0525 | <a href="#">FBM006-025</a> | PBCN10255 | 6.8  | 170   | 340 |
| WPE0176 | IPE0526 | <a href="#">FBM006-026</a> | PBCN10243 | 4.2  | 105   | 210 |
|         | IPE0527 | <a href="#">FBM006-027</a> | PBCN10227 | 4.0  | 100   | 200 |
|         | IPE0528 | <a href="#">FBM006-028</a> | PBCN10281 | 6.2  | 155   | 310 |
| WPE0177 | IPE0529 | <a href="#">FBM006-029</a> | PBCN10293 | 8.6  | 215   | 430 |
|         | IPE0530 | <a href="#">FBM006-030</a> | PBCN10254 | 6.7  | 167.5 | 335 |
|         | IPE0531 | <a href="#">FBM006-031</a> | PBCN10226 | 7.3  | 182.5 | 365 |
| WPE0178 | IPE0532 | <a href="#">FBM006-032</a> | PBCN10216 | 5.0  | 125   | 250 |
|         | IPE0533 | <a href="#">FBM006-033</a> | PBCN10246 | 8.6  | 215   | 430 |
|         | IPE0534 | <a href="#">FBM006-034</a> | PBCN10203 | 4.2  | 105   | 210 |
| WPE0179 | IPE0535 | <a href="#">FBM006-035</a> | PBCN10232 | 9.8  | 245   | 490 |
|         | IPE0536 | <a href="#">FBM006-036</a> | PBCN10321 | 4.6  | 115   | 230 |
|         | IPE0537 | <a href="#">FBM006-037</a> | PBCN10272 | 7.8  | 195   | 390 |
| WPE0180 | IPE0538 | <a href="#">FBM006-038</a> | PBCN10242 | 3.7  | 92.5  | 185 |
|         | IPE0539 | <a href="#">FBM006-039</a> | PBCN10290 | 6.1  | 152.5 | 305 |

|         |         |                            |           |      |       |      |
|---------|---------|----------------------------|-----------|------|-------|------|
|         | IPE0540 | <a href="#">FBM006-040</a> | PBCN10258 | 6.8  | 170   | 340  |
| WPE0181 | IPE0541 | <a href="#">FBM006-041</a> | PBCN10296 | 5.0  | 125   | 250  |
|         | IPE0542 | <a href="#">FBM006-042</a> | PBCN10366 | 5.4  | 135   | 270  |
|         | IPE0543 | <a href="#">FBM006-043</a> | PBCN10225 | 4.5  | 112.5 | 225  |
| WPE0182 | IPE0544 | <a href="#">FBM006-044</a> | PBCN10228 | 3.6  | 90    | 180  |
|         | IPE0545 | <a href="#">FBM006-045</a> | PBCN10381 | 5.2  | 130   | 260  |
|         | IPE0546 | <a href="#">FBM006-046</a> | PBCN10211 | 4.8  | 120   | 240  |
| WPE0183 | IPE0547 | <a href="#">FBM006-047</a> | PBCN10326 | 5.5  | 137.5 | 275  |
|         | IPE0548 | <a href="#">FBM006-048</a> | PBCN10202 | 4.4  | 110   | 220  |
|         | IPE0549 | <a href="#">FBM006-049</a> | PBCN10269 | 6.7  | 167.5 | 335  |
| WPE0184 | IPE0550 | <a href="#">FBM006-050</a> | PBCN10346 | 6.8  | 170   | 340  |
|         | IPE0551 | <a href="#">FBM006-051</a> | PBCN10201 | 4.7  | 117.5 | 235  |
|         | IPE0552 | <a href="#">FBM006-052</a> | PBCN10222 | 4.3  | 107.5 | 215  |
| WPE0185 | IPE0553 | <a href="#">FBM006-053</a> | PBCN10261 | 5.8  | 145   | 290  |
|         | IPE0554 | <a href="#">FBM006-054</a> | PBCN10208 | 5.4  | 135   | 270  |
|         | IPE0555 | <a href="#">FBM006-055</a> | PBCN10206 | 5.2  | 130   | 260  |
| WPE0186 | IPE0556 | <a href="#">FBM006-056</a> | PBCN10268 | 4.6  | 115   | 230  |
|         | IPE0557 | <a href="#">FBM006-057</a> | PBCN10383 | 6.6  | 165   | 330  |
|         | IPE0558 | <a href="#">FBM006-058</a> | PBCN10236 | 5.0  | 125   | 250  |
| WPE0187 | IPE0559 | <a href="#">FBM006-059</a> | PBCN10229 | 9.2  | 230   | 460  |
|         | IPE0560 | <a href="#">FBM006-060</a> | PBCN10207 | 5.5  | 137.5 | 275  |
|         | IPE0561 | <a href="#">FBM006-061</a> | PBCN10345 | 9.2  | 230   | 460  |
| WPE0188 | IPE0562 | <a href="#">FBM006-062</a> | PBCN10275 | 10.5 | 262.5 | 525  |
|         | IPE0563 | <a href="#">FBM006-063</a> | PBCN10284 | 13.5 | 337.5 | 675  |
|         | IPE0564 | <a href="#">FBM006-064</a> | PBCN10265 | 6.7  | 167.5 | 335  |
| WPE0189 | IPE0565 | <a href="#">FBM006-065</a> | PBCN10343 | 5.2  | 130   | 260  |
|         | IPE0566 | <a href="#">FBM006-066</a> | PBCN10382 | 2.9  | 72.5  | 145  |
|         | IPE0567 | <a href="#">FBM006-067</a> | PBCN10342 | 23.5 | 587.5 | 1175 |
| WPE0190 | IPE0568 | <a href="#">FBM006-068</a> | PBCN10219 | 4.7  | 117.5 | 235  |
|         | IPE0569 | <a href="#">FBM006-069</a> | PBCN10263 | 6.3  | 157.5 | 315  |
|         | IPE0570 | <a href="#">FBM006-070</a> | PBCN10306 | 7.4  | 185   | 370  |
| WPE0191 | IPE0571 | <a href="#">FBM006-071</a> | PBCN10274 | 3.8  | 95    | 190  |
|         | IPE0572 | <a href="#">FBM006-072</a> | PBCN10335 | 4.8  | 120   | 240  |
|         | IPE0573 | <a href="#">FBM006-073</a> | PBCN10351 | 6.7  | 167.5 | 335  |
| WPE0192 | IPE0574 | <a href="#">FBM006-074</a> | PBCN10312 | 6.0  | 150   | 300  |
|         | IPE0575 | <a href="#">FBM006-075</a> | PBCN10322 | 5.3  | 132.5 | 265  |
|         | IPE0576 | <a href="#">FBM006-076</a> | PBCN10253 | 10.9 | 272.5 | 545  |
| WPE0193 | IPE0577 | <a href="#">FBM006-077</a> | PBCN10241 | 7.7  | 192.5 | 385  |
|         | IPE0578 | <a href="#">FBM006-078</a> | PBCN10283 | 8.0  | 200   | 400  |

|         |         |                            |                           |      |       |     |
|---------|---------|----------------------------|---------------------------|------|-------|-----|
|         | IPE0579 | <a href="#">FBM006-079</a> | PBCN10370                 | 5.3  | 132.5 | 265 |
| WPE0194 | IPE0580 | <a href="#">FBM006-080</a> | PBCN10224                 | 6.1  | 152.5 | 305 |
|         | IPE0581 | <a href="#">FBM006-081</a> | PBCN10282                 | 5.3  | 132.5 | 265 |
|         | IPE0582 | <a href="#">FBM006-082</a> | PBCN10390                 | 4.7  | 117.5 | 235 |
| WPE0195 | IPE0583 | <a href="#">FBM006-083</a> | PBCN10324                 | 5.8  | 145   | 290 |
|         | IPE0584 | <a href="#">FBM006-084</a> | PBCN10347                 | 5.6  | 140   | 280 |
|         | IPE0585 | <a href="#">FBM006-085</a> | PBCN10218                 | 4.6  | 115   | 230 |
| WPE0196 | IPE0586 | <a href="#">FBM006-086</a> | PBCN10333                 | 4.0  | 100   | 200 |
|         | IPE0587 | <a href="#">FBM006-087</a> | PBCN10305                 | 3.9  | 97.5  | 195 |
|         | IPE0588 | <a href="#">FBM006-088</a> | PBCN10317                 | 3.8  | 95    | 190 |
| WPE0197 | IPE0589 | <a href="#">FBM006-089</a> | PBCN10223                 | 9.1  | 227.5 | 455 |
|         | IPE0590 | <a href="#">FBM006-090</a> | PBCN10279                 | 9.9  | 247.5 | 495 |
|         | IPE0591 | <a href="#">FBM006-091</a> | PBCN10309                 | 7.4  | 185   | 370 |
| WPE0198 | IPE0592 | <a href="#">FBM006-092</a> | PBCN10209                 | 11.9 | 297.5 | 595 |
|         | IPE0593 | <a href="#">FBM006-093</a> | PBCN10237                 | 6.0  | 150   | 300 |
|         | IPE0594 | <a href="#">FBM006-094</a> | PBCN10205                 | 3.9  | 97.5  | 195 |
| WPE0199 | IPE0595 | <a href="#">FBM006-095</a> | PBCN10327                 | 8.4  | 210   | 420 |
|         | IPE0596 | <a href="#">FBM006-096</a> | PBCN10245                 | 6.5  | 162.5 | 325 |
|         | IPE0597 | <a href="#">FBM006-097</a> | PBCN10292                 | 4.4  | 110   | 220 |
| WPE0200 | IPE0598 | <a href="#">FBM006-098</a> | PBCN10220                 | 4.8  | 120   | 240 |
|         | IPE0599 | <a href="#">FBM006-099</a> | PBCN10212                 | 4.6  | 115   | 230 |
|         | IPE0600 | <a href="#">FBM006-100</a> | PBCN10270                 | 11.2 | 280   | 560 |
| WPE0201 | IPE0601 | <a href="#">FBM007-001</a> | <a href="#">PBCN10341</a> | 5.4  | 135   | 270 |
|         | IPE0602 | <a href="#">FBM007-002</a> | <a href="#">PBCN10399</a> | 4.0  | 100   | 200 |
|         | IPE0603 | <a href="#">FBM007-003</a> | <a href="#">PBCN10372</a> | 3.2  | 80    | 160 |
| WPE0202 | IPE0604 | <a href="#">FBM007-004</a> | <a href="#">PBCN10397</a> | 12.3 | 307.5 | 615 |
|         | IPE0605 | <a href="#">FBM007-005</a> | <a href="#">PBCN10303</a> | 6.5  | 162.5 | 325 |
|         | IPE0606 | <a href="#">FBM007-006</a> | <a href="#">PBCN11191</a> | 3.1  | 77.5  | 155 |
| WPE0203 | IPE0607 | <a href="#">FBM007-007</a> | <a href="#">PBCN10340</a> | 9.7  | 242.5 | 485 |
|         | IPE0608 | <a href="#">FBM007-008</a> | <a href="#">PBCN10373</a> | 8.6  | 215   | 430 |
|         | IPE0609 | <a href="#">FBM007-009</a> | <a href="#">PBCN10251</a> | 4.9  | 122.5 | 245 |
| WPE0204 | IPE0610 | <a href="#">FBM007-010</a> | <a href="#">PBCN10304</a> | 4.8  | 120   | 240 |
|         | IPE0611 | <a href="#">FBM007-011</a> | <a href="#">PBCN10311</a> | 8.3  | 207.5 | 415 |
|         | IPE0612 | <a href="#">FBM007-012</a> | <a href="#">PBCN10350</a> | 10.0 | 250   | 500 |
| WPE0205 | IPE0613 | <a href="#">FBM007-013</a> | <a href="#">PBCN10319</a> | 5.8  | 145   | 290 |
|         | IPE0614 | <a href="#">FBM007-014</a> | <a href="#">PBCN10336</a> | 9.0  | 225   | 450 |
|         | IPE0615 | <a href="#">FBM007-015</a> | <a href="#">PBCN10368</a> | 6.3  | 157.5 | 315 |
| WPE0206 | IPE0616 | <a href="#">FBM007-016</a> | <a href="#">PBCN10325</a> | 3.9  | 97.5  | 195 |
|         | IPE0617 | <a href="#">FBM007-017</a> | <a href="#">PBCN10295</a> | 5.4  | 135   | 270 |



|         |         |                            |                            |      |       |      |
|---------|---------|----------------------------|----------------------------|------|-------|------|
|         | IPE0618 | <a href="#">FBM007-018</a> | <a href="#">PBCN10259</a>  | 10.8 | 270   | 540  |
| WPE0207 | IPE0619 | <a href="#">FBM007-019</a> | <a href="#">PBCN10307</a>  | 4.2  | 105   | 210  |
|         | IPE0620 | <a href="#">FBM007-020</a> | <a href="#">PBCN10277</a>  | 12.3 | 307.5 | 615  |
|         | IPE0621 | <a href="#">FBM007-021</a> | <a href="#">PBCN10364</a>  | 6.3  | 157.5 | 315  |
| WPE0208 | IPE0622 | <a href="#">FBM007-022</a> | <a href="#">PBCN10358</a>  | 6.9  | 172.5 | 345  |
|         | IPE0623 | <a href="#">FBM007-023</a> | <a href="#">PBCN10210</a>  | 9.1  | 227.5 | 455  |
|         | IPE0624 | <a href="#">FBM007-024</a> | <a href="#">PBCN10352</a>  | 13.5 | 337.5 | 675  |
| WPE0209 | IPE0625 | <a href="#">FBM007-025</a> | <a href="#">PBCN10395</a>  | 9.9  | 247.5 | 495  |
|         | IPE0626 | <a href="#">FBM007-026</a> | <a href="#">PBCN10310</a>  | 8.7  | 217.5 | 435  |
|         | IPE0627 | <a href="#">FBM007-027</a> | <a href="#">PBCN10247</a>  | 7.1  | 177.5 | 355  |
| WPE0210 | IPE0628 | <a href="#">FBM007-028</a> | <a href="#">PBCN10204</a>  | 5.1  | 127.5 | 255  |
|         | IPE0629 | <a href="#">FBM007-029</a> | <a href="#">PBCN10367</a>  | 13.4 | 335   | 670  |
|         | IPE0630 | <a href="#">FBM007-030</a> | <a href="#">PBCN10271</a>  | 8.3  | 207.5 | 415  |
| WPE0211 | IPE0631 | <a href="#">FBM007-031</a> | <a href="#">PBCN10378</a>  | 8.5  | 212.5 | 425  |
|         | IPE0632 | <a href="#">FBM007-032</a> | <a href="#">PBCN10329</a>  | 5.4  | 135   | 270  |
|         | IPE0633 | <a href="#">FBM007-033</a> | <a href="#">PBCN10393</a>  | 7.4  | 185   | 370  |
| WPE0212 | IPE0634 | <a href="#">FBM007-034</a> | <a href="#">PBCN11265</a>  | 15.8 | 395   | 790  |
|         | IPE0635 | <a href="#">FBM007-035</a> | <a href="#">PBCN10240</a>  | 10.4 | 260   | 520  |
|         | IPE0636 | <a href="#">FBM007-036</a> | <a href="#">PBCN10368</a>  | 6.5  | 162.5 | 325  |
| WPE0213 | IPE0637 | <a href="#">FBM007-037</a> | <a href="#">PBCN10379</a>  | 7.3  | 182.5 | 365  |
|         | IPE0638 | <a href="#">FBM007-038</a> | <a href="#">PBCN10302</a>  | 10.0 | 250   | 500  |
|         | IPE0639 | <a href="#">FBM007-039</a> | <a href="#">PBCN10375</a>  | 6.5  | 162.5 | 325  |
| WPE0214 | IPE0640 | <a href="#">FBM007-040</a> | <a href="#">PBCN10244</a>  | 25.0 | 625   | 1250 |
|         | IPE0641 | <a href="#">FBM007-041</a> | <a href="#">PBCN10374</a>  | 12.4 | 310   | 620  |
|         | IPE0642 | <a href="#">FBM007-042</a> | <a href="#">PBCN10313</a>  | 12.3 | 307.5 | 615  |
| WPE0215 | IPE0643 | <a href="#">FBM007-043</a> | <a href="#">PBCN10388</a>  | 6.3  | 157.5 | 315  |
|         | IPE0644 | <a href="#">FBM007-044</a> | <a href="#">PBCN11282</a>  | 8.0  | 200   | 400  |
|         | IPE0645 | <a href="#">FBM007-045</a> | <a href="#">PBCN10371</a>  | 9.4  | 235   | 470  |
| WPE0216 | IPE0646 | <a href="#">FBM007-046</a> | <a href="#">PBCN10349</a>  | 5.0  | 125   | 250  |
|         | IPE0647 | <a href="#">FBM007-047</a> | <a href="#">PBCN10354</a>  | 1.1  | 27.5  | 55   |
|         | IPE0648 | <a href="#">FBM007-048</a> | <a href="#">PBCN10314</a>  | 10.0 | 250   | 500  |
| WPE0217 | IPE0649 | <a href="#">FBM007-049</a> | <a href="#">PBCN10266</a>  | 7.7  | 192.5 | 385  |
|         | IPE0650 | <a href="#">FBM007-050</a> | <a href="#">PBCN10339</a>  | 5.3  | 132.5 | 265  |
|         | IPE0651 | <a href="#">FBM007-051</a> | <a href="#">PBCN102385</a> | 5.2  | 130   | 260  |
| WPE0218 | IPE0652 | <a href="#">FBM007-052</a> | <a href="#">PBCN10252</a>  | 3.4  | 85    | 170  |
|         | IPE0653 | <a href="#">FBM007-053</a> | <a href="#">PBCN10264</a>  | 10.4 | 260   | 520  |
|         | IPE0654 | <a href="#">FBM007-054</a> | <a href="#">PBCN10357</a>  | 8.0  | 200   | 400  |
| WPE0219 | IPE0655 | <a href="#">FBM007-055</a> | <a href="#">PBCN10398</a>  | 5.8  | 145   | 290  |
|         | IPE0656 | <a href="#">FBM007-056</a> | <a href="#">PBCN10214</a>  | 7.5  | 187.5 | 375  |

|         |         |                            |                           |      |       |     |
|---------|---------|----------------------------|---------------------------|------|-------|-----|
|         | IPE0657 | <a href="#">FBM007-057</a> | <a href="#">PBCN10359</a> | 6.4  | 160   | 320 |
| WPE0220 | IPE0658 | <a href="#">FBM007-058</a> | <a href="#">PBCN10334</a> | 3.7  | 92.5  | 185 |
|         | IPE0659 | <a href="#">FBM007-059</a> | <a href="#">PBCN10332</a> | 3.4  | 85    | 170 |
|         | IPE0660 | <a href="#">FBM007-060</a> | <a href="#">PBCN10323</a> | 7.0  | 175   | 350 |
| WPE0221 | IPE0661 | <a href="#">FBM007-061</a> | <a href="#">PBCN10394</a> | 4.8  | 120   | 240 |
|         | IPE0662 | <a href="#">FBM007-062</a> | <a href="#">PBCN10380</a> | 7.6  | 190   | 380 |
|         | IPE0663 | <a href="#">FBM007-063</a> | <a href="#">PBCN10369</a> | 11.5 | 287.5 | 575 |
| WPE0222 | IPE0664 | <a href="#">FBM007-064</a> | <a href="#">PBCN10221</a> | 9.9  | 247.5 | 495 |
|         | IPE0665 | <a href="#">FBM007-065</a> | <a href="#">PBCN10377</a> | 5.6  | 140   | 280 |
|         | IPE0666 | <a href="#">FBM007-066</a> | <a href="#">PBCN10297</a> | 9.2  | 230   | 460 |
| WPE0223 | IPE0667 | <a href="#">FBM007-067</a> | <a href="#">PBCN10285</a> | 8.0  | 200   | 400 |
|         | IPE0668 | <a href="#">FBM007-068</a> | <a href="#">PBCN10391</a> | 4.5  | 112.5 | 225 |
|         | IPE0669 | <a href="#">FBM007-069</a> | <a href="#">PBCN10344</a> | 9.0  | 225   | 450 |
| WPE0224 | IPE0670 | <a href="#">FBM007-070</a> | <a href="#">PBCN10250</a> | 6.5  | 162.5 | 325 |
|         | IPE0671 | <a href="#">FBM007-071</a> | <a href="#">PBCN10361</a> | 8.8  | 220   | 440 |
|         | IPE0672 | <a href="#">FBM007-072</a> | <a href="#">PBCN10291</a> | 6.9  | 172.5 | 345 |
| WPE0225 | IPE0673 | <a href="#">FBM007-073</a> | <a href="#">PBCN10267</a> | 6.9  | 172.5 | 345 |
|         | IPE0674 | <a href="#">FBM007-074</a> | <a href="#">PBCN10288</a> | 5.4  | 135   | 270 |
|         | IPE0675 | <a href="#">FBM007-075</a> | <a href="#">PBCN10256</a> | 12.0 | 300   | 600 |
| WPE0226 | IPE0676 | <a href="#">FBM007-076</a> | <a href="#">PBCN10384</a> | 9.1  | 227.5 | 455 |
|         | IPE0677 | <a href="#">FBM007-077</a> | <a href="#">PBCN11245</a> | 8.7  | 217.5 | 435 |
|         | IPE0678 | <a href="#">FBM007-078</a> | <a href="#">PBCN10287</a> | 9.4  | 235   | 470 |
| WPE0227 | IPE0679 | <a href="#">FBM007-079</a> | <a href="#">PBCN10337</a> | 3.6  | 90    | 180 |
|         | IPE0680 | <a href="#">FBM007-080</a> | <a href="#">PBCN10396</a> | 7.5  | 187.5 | 375 |
|         | IPE0681 | <a href="#">FBM007-081</a> | <a href="#">PBCN10387</a> | 10.9 | 272.5 | 545 |
| WPE0228 | IPE0682 | <a href="#">FBM007-082</a> | <a href="#">PBCN10385</a> | 5.5  | 137.5 | 275 |
|         | IPE0683 | <a href="#">FBM007-083</a> | <a href="#">PBCN10299</a> | 7.1  | 177.5 | 355 |
|         | IPE0684 | <a href="#">FBM007-084</a> | <a href="#">PBCN10231</a> | 17.3 | 432.5 | 865 |
| WPE0229 | IPE0685 | <a href="#">FBM007-085</a> | <a href="#">PBCN10363</a> | 7.5  | 187.5 | 375 |
|         | IPE0686 | <a href="#">FBM007-086</a> | <a href="#">PBCN10338</a> | 6.5  | 162.5 | 325 |
|         | IPE0687 | <a href="#">FBM007-087</a> | <a href="#">PBCN10308</a> | 8.6  | 215   | 430 |
| WPE0230 | IPE0688 | <a href="#">FBM007-088</a> | <a href="#">PBCN10362</a> | 4.3  | 107.5 | 215 |
|         | IPE0689 | <a href="#">FBM007-089</a> | <a href="#">PBCN10262</a> | 3.6  | 90    | 180 |
|         | IPE0690 | <a href="#">FBM007-090</a> | <a href="#">PBCN10276</a> | 10.5 | 262.5 | 525 |
| WPE0231 | IPE0691 | <a href="#">FBM007-091</a> | <a href="#">PBCN10320</a> | 5.2  | 130   | 260 |
|         | IPE0692 | <a href="#">FBM007-092</a> | <a href="#">PBCN10318</a> | 7.1  | 177.5 | 355 |
|         | IPE0693 | <a href="#">FBM007-093</a> | <a href="#">PBCN10328</a> | 6.0  | 150   | 300 |
| WPE0232 | IPE0694 | <a href="#">FBM007-094</a> | <a href="#">PBCN10331</a> | 8.6  | 215   | 430 |
|         | IPE0695 | <a href="#">FBM007-095</a> | <a href="#">PBCN10257</a> | 13.5 | 337.5 | 675 |

|         |         |                            |                           |      |       |     |
|---------|---------|----------------------------|---------------------------|------|-------|-----|
|         | IPE0696 | <a href="#">FBM007-096</a> | <a href="#">PBCN10248</a> | 8.6  | 215   | 430 |
| WPE0233 | IPE0697 | <a href="#">FBM007-097</a> | <a href="#">PBCN10356</a> | 0.0  | 0     | 0   |
|         | IPE0698 | <a href="#">FBM007-098</a> | <a href="#">PBCN10330</a> | 11.9 | 297.5 | 595 |
|         | IPE0699 | <a href="#">FBM007-099</a> | <a href="#">PBCN10301</a> | 6.0  | 150   | 300 |
| WPE0234 | IPE0700 | <a href="#">FBM007-100</a> | <a href="#">PBCN10376</a> | 9.5  | 237.5 | 475 |
|         | IPE0701 | <a href="#">FBM008-001</a> | <a href="#">PBCN10401</a> | 18.3 | 457.5 | 915 |
|         | IPE0702 | <a href="#">FBM008-002</a> | <a href="#">PBCN10402</a> | 7.7  | 192.5 | 385 |
| WPE0235 | IPE0703 | <a href="#">FBM008-003</a> | <a href="#">PBCN10403</a> | 2.2  | 55    | 110 |
|         | IPE0704 | <a href="#">FBM008-004</a> | <a href="#">PBCN10404</a> | 3.4  | 85    | 170 |
|         | IPE0705 | <a href="#">FBM008-005</a> | <a href="#">PBCN10405</a> | 11.0 | 275   | 550 |
| WPE0236 | IPE0706 | <a href="#">FBM008-006</a> | <a href="#">PBCN10406</a> | 8.1  | 202.5 | 405 |
|         | IPE0707 | <a href="#">FBM008-007</a> | <a href="#">PBCN10407</a> | 7.0  | 175   | 350 |
|         | IPE0708 | <a href="#">FBM008-008</a> | <a href="#">PBCN10408</a> | 5.1  | 127.5 | 255 |
| WPE0237 | IPE0709 | <a href="#">FBM008-009</a> | <a href="#">PBCN10409</a> | 5.3  | 132.5 | 265 |
|         | IPE0710 | <a href="#">FBM008-010</a> | <a href="#">PBCN10410</a> | 8.9  | 222.5 | 445 |
|         | IPE0711 | <a href="#">FBM008-011</a> | <a href="#">PBCN10411</a> | 6.3  | 157.5 | 315 |
| WPE0238 | IPE0712 | <a href="#">FBM008-012</a> | <a href="#">PBCN10412</a> | 4.0  | 100   | 200 |
|         | IPE0713 | <a href="#">FBM008-013</a> | <a href="#">PBCN10413</a> | 4.8  | 120   | 240 |
|         | IPE0714 | <a href="#">FBM008-014</a> | <a href="#">PBCN10414</a> | 13.0 | 325   | 650 |
| WPE0239 | IPE0715 | <a href="#">FBM008-015</a> | <a href="#">PBCN10415</a> | 7.8  | 195   | 390 |
|         | IPE0716 | <a href="#">FBM008-016</a> | <a href="#">PBCN10416</a> | 6.7  | 167.5 | 335 |
|         | IPE0717 | <a href="#">FBM008-017</a> | <a href="#">PBCN10417</a> | 5.8  | 145   | 290 |
| WPE0240 | IPE0718 | <a href="#">FBM008-018</a> | <a href="#">PBCN10418</a> | 13.8 | 345   | 690 |
|         | IPE0719 | <a href="#">FBM008-019</a> | <a href="#">PBCN10419</a> | 7.1  | 177.5 | 355 |
|         | IPE0720 | <a href="#">FBM008-020</a> | <a href="#">PBCN10420</a> | 14.3 | 357.5 | 715 |
| WPE0241 | IPE0721 | <a href="#">FBM008-021</a> | <a href="#">PBCN10421</a> | 19.7 | 492.5 | 985 |
|         | IPE0722 | <a href="#">FBM008-022</a> | <a href="#">PBCN10422</a> | 15.4 | 385   | 770 |
|         | IPE0723 | <a href="#">FBM008-023</a> | <a href="#">PBCN10423</a> | 4.6  | 115   | 230 |
| WPE0242 | IPE0724 | <a href="#">FBM008-024</a> | <a href="#">PBCN10424</a> | 5.6  | 140   | 280 |
|         | IPE0725 | <a href="#">FBM008-025</a> | <a href="#">PBCN10425</a> | 16.8 | 420   | 840 |
|         | IPE0726 | <a href="#">FBM008-026</a> | <a href="#">PBCN10426</a> | 2.2  | 55    | 110 |
| WPE0243 | IPE0727 | <a href="#">FBM008-027</a> | <a href="#">PBCN10427</a> | 10.5 | 262.5 | 525 |
|         | IPE0728 | <a href="#">FBM008-028</a> | <a href="#">PBCN10428</a> | 8.1  | 202.5 | 405 |
|         | IPE0729 | <a href="#">FBM008-029</a> | <a href="#">PBCN10429</a> | 13.8 | 345   | 690 |
| WPE0244 | IPE0730 | <a href="#">FBM008-030</a> | <a href="#">PBCN10430</a> | 10.6 | 265   | 530 |
|         | IPE0731 | <a href="#">FBM008-031</a> | <a href="#">PBCN10431</a> | 8.8  | 220   | 440 |
|         | IPE0732 | <a href="#">FBM008-032</a> | <a href="#">PBCN10432</a> | 11.0 | 275   | 550 |
| WPE0245 | IPE0733 | <a href="#">FBM008-033</a> | <a href="#">PBCN10433</a> | 8.5  | 212.5 | 425 |
|         | IPE0734 | <a href="#">FBM008-034</a> | <a href="#">PBCN10434</a> | 8.8  | 220   | 440 |

|         |         |                            |                           |      |       |      |
|---------|---------|----------------------------|---------------------------|------|-------|------|
|         | IPE0735 | <a href="#">FBM008-035</a> | <a href="#">PBCN10435</a> | 12.5 | 312.5 | 625  |
| WPE0246 | IPE0736 | <a href="#">FBM008-036</a> | <a href="#">PBCN10436</a> | 0.2  | 5     | 10   |
|         | IPE0737 | <a href="#">FBM008-037</a> | <a href="#">PBCN10437</a> | 6.0  | 150   | 300  |
|         | IPE0738 | <a href="#">FBM008-038</a> | <a href="#">PBCN10438</a> | 13.6 | 340   | 680  |
| WPE0247 | IPE0739 | <a href="#">FBM008-039</a> | <a href="#">PBCN10439</a> | 15.8 | 395   | 790  |
|         | IPE0740 | <a href="#">FBM008-040</a> | <a href="#">PBCN10440</a> | 13.0 | 325   | 650  |
|         | IPE0741 | <a href="#">FBM008-041</a> | <a href="#">PBCN10441</a> | 5.3  | 132.5 | 265  |
| WPE0248 | IPE0742 | <a href="#">FBM008-042</a> | <a href="#">PBCN10442</a> | 6.4  | 160   | 320  |
|         | IPE0743 | <a href="#">FBM008-043</a> | <a href="#">PBCN10443</a> | 13.5 | 337.5 | 675  |
|         | IPE0744 | <a href="#">FBM008-044</a> | <a href="#">PBCN10444</a> | 9.7  | 242.5 | 485  |
| WPE0249 | IPE0745 | <a href="#">FBM008-045</a> | <a href="#">PBCN10445</a> | 7.6  | 190   | 380  |
|         | IPE0746 | <a href="#">FBM008-046</a> | <a href="#">PBCN10446</a> | 8.3  | 207.5 | 415  |
|         | IPE0747 | <a href="#">FBM008-047</a> | <a href="#">PBCN10447</a> | 14.6 | 365   | 730  |
| WPE0250 | IPE0748 | <a href="#">FBM008-048</a> | <a href="#">PBCN10448</a> | 16.8 | 420   | 840  |
|         | IPE0749 | <a href="#">FBM008-049</a> | <a href="#">PBCN10449</a> | 21.4 | 535   | 1070 |
|         | IPE0750 | <a href="#">FBM008-050</a> | <a href="#">PBCN10450</a> | 5.0  | 125   | 250  |
| WPE0251 | IPE0751 | <a href="#">FBM008-051</a> | <a href="#">PBCN10451</a> | 11.3 | 282.5 | 565  |
|         | IPE0752 | <a href="#">FBM008-052</a> | <a href="#">PBCN10452</a> | 4.4  | 110   | 220  |
|         | IPE0753 | <a href="#">FBM008-053</a> | <a href="#">PBCN10453</a> | 13.3 | 332.5 | 665  |
| WPE0252 | IPE0754 | <a href="#">FBM008-054</a> | <a href="#">PBCN10454</a> | 6.7  | 167.5 | 335  |
|         | IPE0755 | <a href="#">FBM008-055</a> | <a href="#">PBCN10455</a> | 18.9 | 472.5 | 945  |
|         | IPE0756 | <a href="#">FBM008-056</a> | <a href="#">PBCN10456</a> | 5.9  | 147.5 | 295  |
| WPE0253 | IPE0757 | <a href="#">FBM008-057</a> | <a href="#">PBCN10457</a> | 9.0  | 225   | 450  |
|         | IPE0758 | <a href="#">FBM008-058</a> | <a href="#">PBCN10458</a> | 8.3  | 207.5 | 415  |
|         | IPE0759 | <a href="#">FBM008-059</a> | <a href="#">PBCN10459</a> | 10.0 | 250   | 500  |
| WPE0254 | IPE0760 | <a href="#">FBM008-060</a> | <a href="#">PBCN10460</a> | 12.4 | 310   | 620  |
|         | IPE0761 | <a href="#">FBM008-061</a> | <a href="#">PBCN10461</a> | 5.6  | 140   | 280  |
|         | IPE0762 | <a href="#">FBM008-062</a> | <a href="#">PBCN10462</a> | 16.1 | 402.5 | 805  |
| WPE0255 | IPE0763 | <a href="#">FBM008-063</a> | <a href="#">PBCN10463</a> | 3.5  | 87.5  | 175  |
|         | IPE0764 | <a href="#">FBM008-064</a> | <a href="#">PBCN10464</a> | 4.5  | 112.5 | 225  |
|         | IPE0765 | <a href="#">FBM008-065</a> | <a href="#">PBCN10465</a> | 1.7  | 42.5  | 85   |
| WPE0256 | IPE0766 | <a href="#">FBM008-066</a> | <a href="#">PBCN10466</a> | 7.1  | 177.5 | 355  |
|         | IPE0767 | <a href="#">FBM008-067</a> | <a href="#">PBCN10467</a> | 8.6  | 215   | 430  |
|         | IPE0768 | <a href="#">FBM008-068</a> | <a href="#">PBCN10468</a> | 14.6 | 365   | 730  |
| WPE0257 | IPE0769 | <a href="#">FBM008-069</a> | <a href="#">PBCN10469</a> | 9.5  | 237.5 | 475  |
|         | IPE0770 | <a href="#">FBM008-070</a> | <a href="#">PBCN10470</a> | 6.5  | 162.5 | 325  |
|         | IPE0771 | <a href="#">FBM008-071</a> | <a href="#">PBCN10471</a> | 13.7 | 342.5 | 685  |
| WPE0258 | IPE0772 | <a href="#">FBM008-072</a> | <a href="#">PBCN10472</a> | 10.9 | 272.5 | 545  |
|         | IPE0773 | <a href="#">FBM008-073</a> | <a href="#">PBCN10473</a> | 3.8  | 95    | 190  |

|         |         |                            |                           |      |       |     |
|---------|---------|----------------------------|---------------------------|------|-------|-----|
|         | IPE0774 | <a href="#">FBM008-074</a> | <a href="#">PBCN10474</a> | 9.1  | 227.5 | 455 |
| WPE0259 | IPE0775 | <a href="#">FBM008-075</a> | <a href="#">PBCN10475</a> | 4.5  | 112.5 | 225 |
|         | IPE0776 | <a href="#">FBM008-076</a> | <a href="#">PBCN10476</a> | 7.1  | 177.5 | 355 |
|         | IPE0777 | <a href="#">FBM008-077</a> | <a href="#">PBCN10477</a> | 8.2  | 205   | 410 |
| WPE0260 | IPE0778 | <a href="#">FBM008-078</a> | <a href="#">PBCN10478</a> | 5.0  | 125   | 250 |
|         | IPE0779 | <a href="#">FBM008-079</a> | <a href="#">PBCN10479</a> | 6.9  | 172.5 | 345 |
|         | IPE0780 | <a href="#">FBM008-080</a> | <a href="#">PBCN10480</a> | 10.8 | 270   | 540 |
| WPE0261 | IPE0781 | <a href="#">FBM008-081</a> | <a href="#">PBCN10481</a> | 3.8  | 95    | 190 |
|         | IPE0782 | <a href="#">FBM008-082</a> | <a href="#">PBCN10482</a> | 6.2  | 155   | 310 |
|         | IPE0783 | <a href="#">FBM008-083</a> | <a href="#">PBCN10483</a> | 2.3  | 57.5  | 115 |
| WPE0262 | IPE0784 | <a href="#">FBM008-084</a> | <a href="#">PBCN10484</a> | 7.7  | 192.5 | 385 |
|         | IPE0785 | <a href="#">FBM008-085</a> | <a href="#">PBCN10485</a> | 6.6  | 165   | 330 |
|         | IPE0786 | <a href="#">FBM008-086</a> | <a href="#">PBCN10486</a> | 12.2 | 305   | 610 |
| WPE0263 | IPE0787 | <a href="#">FBM008-087</a> | <a href="#">PBCN10487</a> | 7.2  | 180   | 360 |
|         | IPE0788 | <a href="#">FBM008-088</a> | <a href="#">PBCN10488</a> | 5.9  | 147.5 | 295 |
|         | IPE0789 | <a href="#">FBM008-089</a> | <a href="#">PBCN10489</a> | 11.8 | 295   | 590 |
| WPE0264 | IPE0790 | <a href="#">FBM008-090</a> | <a href="#">PBCN10490</a> | 7.3  | 182.5 | 365 |
|         | IPE0791 | <a href="#">FBM008-091</a> | <a href="#">PBCN10491</a> | 6.4  | 160   | 320 |
|         | IPE0792 | <a href="#">FBM008-092</a> | <a href="#">PBCN10492</a> | 5.7  | 142.5 | 285 |
| WPE0265 | IPE0793 | <a href="#">FBM008-093</a> | <a href="#">PBCN10493</a> | 5.8  | 145   | 290 |
|         | IPE0794 | <a href="#">FBM008-094</a> | <a href="#">PBCN10494</a> | 8.8  | 220   | 440 |
|         | IPE0795 | <a href="#">FBM008-095</a> | <a href="#">PBCN10495</a> | 14.1 | 352.5 | 705 |
| WPE0266 | IPE0796 | <a href="#">FBM008-096</a> | <a href="#">PBCN10496</a> | 8.0  | 200   | 400 |
|         | IPE0797 | <a href="#">FBM008-097</a> | <a href="#">PBCN10497</a> | 5.0  | 125   | 250 |
|         | IPE0798 | <a href="#">FBM008-098</a> | <a href="#">PBCN10498</a> | 10.3 | 257.5 | 515 |
| WPE0267 | IPE0799 | <a href="#">FBM008-099</a> | <a href="#">PBCN10499</a> | 11.1 | 277.5 | 555 |
|         | IPE0800 | <a href="#">FBM008-100</a> | <a href="#">PBCN10500</a> | 12.4 | 310   | 620 |
|         | IPE0801 | <a href="#">FBM009-001</a> | <a href="#">PBCN10501</a> | 4.2  | 105   | 210 |
| WPE0268 | IPE0802 | <a href="#">FBM009-002</a> | <a href="#">PBCN10502</a> | 2.6  | 65    | 130 |
|         | IPE0803 | <a href="#">FBM009-003</a> | <a href="#">PBCN10503</a> | 2.4  | 60    | 120 |
|         | IPE0804 | <a href="#">FBM009-004</a> | <a href="#">PBCN10504</a> | 3.9  | 97.5  | 195 |
| WPE0269 | IPE0805 | <a href="#">FBM009-005</a> | <a href="#">PBCN10505</a> | 6.8  | 170   | 340 |
|         | IPE0806 | <a href="#">FBM009-006</a> | <a href="#">PBCN10506</a> | 7.4  | 185   | 370 |
|         | IPE0807 | <a href="#">FBM009-007</a> | <a href="#">PBCN10507</a> | 4.9  | 122.5 | 245 |
| WPE0270 | IPE0808 | <a href="#">FBM009-008</a> | <a href="#">PBCN10508</a> | 4.2  | 105   | 210 |
|         | IPE0809 | <a href="#">FBM009-009</a> | <a href="#">PBCN10509</a> | 18.5 | 462.5 | 925 |
|         | IPE0810 | <a href="#">FBM009-010</a> | <a href="#">PBCN10510</a> | 8.6  | 215   | 430 |
| WPE0271 | IPE0811 | <a href="#">FBM009-011</a> | <a href="#">PBCN10511</a> | 7.6  | 190   | 380 |
|         | IPE0812 | <a href="#">FBM009-012</a> | <a href="#">PBCN10512</a> | 4.8  | 120   | 240 |

|         |         |                            |                           |      |       |     |
|---------|---------|----------------------------|---------------------------|------|-------|-----|
|         | IPE0813 | <a href="#">FBM009-013</a> | <a href="#">PBCN10513</a> | 2.8  | 70    | 140 |
| WPE0272 | IPE0814 | <a href="#">FBM009-014</a> | <a href="#">PBCN10514</a> | 3.8  | 95    | 190 |
|         | IPE0815 | <a href="#">FBM009-015</a> | <a href="#">PBCN10515</a> | 7.6  | 190   | 380 |
|         | IPE0816 | <a href="#">FBM009-016</a> | <a href="#">PBCN10516</a> | 1.8  | 45    | 90  |
| WPE0273 | IPE0817 | <a href="#">FBM009-017</a> | <a href="#">PBCN10517</a> | 7.1  | 177.5 | 355 |
|         | IPE0818 | <a href="#">FBM009-018</a> | <a href="#">PBCN10518</a> | 2.9  | 72.5  | 145 |
|         | IPE0819 | <a href="#">FBM009-019</a> | <a href="#">PBCN10519</a> | 5.1  | 127.5 | 255 |
| WPE0274 | IPE0820 | <a href="#">FBM009-020</a> | <a href="#">PBCN10520</a> | 3.9  | 97.5  | 195 |
|         | IPE0821 | <a href="#">FBM009-021</a> | <a href="#">PBCN10521</a> | 3.0  | 75    | 150 |
|         | IPE0822 | <a href="#">FBM009-022</a> | <a href="#">PBCN10522</a> | 4.6  | 115   | 230 |
| WPE0275 | IPE0823 | <a href="#">FBM009-023</a> | <a href="#">PBCN10523</a> | 7.6  | 190   | 380 |
|         | IPE0824 | <a href="#">FBM009-024</a> | <a href="#">PBCN10524</a> | 5.6  | 140   | 280 |
|         | IPE0825 | <a href="#">FBM009-025</a> | <a href="#">PBCN10525</a> | 4.9  | 122.5 | 245 |
| WPE0276 | IPE0826 | <a href="#">FBM009-026</a> | <a href="#">PBCN10526</a> | 11.5 | 287.5 | 575 |
|         | IPE0827 | <a href="#">FBM009-027</a> | <a href="#">PBCN10527</a> | 4.6  | 115   | 230 |
|         | IPE0828 | <a href="#">FBM009-028</a> | <a href="#">PBCN10528</a> | 6.2  | 155   | 310 |
| WPE0277 | IPE0829 | <a href="#">FBM009-029</a> | <a href="#">PBCN10529</a> | 11.1 | 277.5 | 555 |
|         | IPE0830 | <a href="#">FBM009-030</a> | <a href="#">PBCN10530</a> | 7.0  | 175   | 350 |
|         | IPE0831 | <a href="#">FBM009-031</a> | <a href="#">PBCN10531</a> | 10.9 | 272.5 | 545 |
| WPE0278 | IPE0832 | <a href="#">FBM009-032</a> | <a href="#">PBCN10532</a> | 7.7  | 192.5 | 385 |
|         | IPE0833 | <a href="#">FBM009-033</a> | <a href="#">PBCN10533</a> | 10.9 | 272.5 | 545 |
|         | IPE0834 | <a href="#">FBM009-034</a> | <a href="#">PBCN10534</a> | 11.2 | 280   | 560 |
| WPE0279 | IPE0835 | <a href="#">FBM009-035</a> | <a href="#">PBCN10535</a> | 5.6  | 140   | 280 |
|         | IPE0836 | <a href="#">FBM009-036</a> | <a href="#">PBCN10536</a> | 8.9  | 222.5 | 445 |
|         | IPE0837 | <a href="#">FBM009-037</a> | <a href="#">PBCN10537</a> | 9.7  | 242.5 | 485 |
| WPE0280 | IPE0838 | <a href="#">FBM009-038</a> | <a href="#">PBCN10538</a> | 7.6  | 190   | 380 |
|         | IPE0839 | <a href="#">FBM009-039</a> | <a href="#">PBCN10539</a> | 12.1 | 302.5 | 605 |
|         | IPE0840 | <a href="#">FBM009-040</a> | <a href="#">PBCN10540</a> | 8.7  | 217.5 | 435 |
| WPE0281 | IPE0841 | <a href="#">FBM009-041</a> | <a href="#">PBCN10541</a> | 5.9  | 147.5 | 295 |
|         | IPE0842 | <a href="#">FBM009-042</a> | <a href="#">PBCN10542</a> | 7.8  | 195   | 390 |
|         | IPE0843 | <a href="#">FBM009-043</a> | <a href="#">PBCN10543</a> | 11.5 | 287.5 | 575 |
| WPE0282 | IPE0844 | <a href="#">FBM009-044</a> | <a href="#">PBCN10544</a> | 7.1  | 177.5 | 355 |
|         | IPE0845 | <a href="#">FBM009-045</a> | <a href="#">PBCN10545</a> | 16.1 | 402.5 | 805 |
|         | IPE0846 | <a href="#">FBM009-046</a> | <a href="#">PBCN10546</a> | 2.3  | 57.5  | 115 |
| WPE0283 | IPE0847 | <a href="#">FBM009-047</a> | <a href="#">PBCN10547</a> | 7.1  | 177.5 | 355 |
|         | IPE0848 | <a href="#">FBM009-048</a> | <a href="#">PBCN10548</a> | 9.7  | 242.5 | 485 |
|         | IPE0849 | <a href="#">FBM009-049</a> | <a href="#">PBCN10549</a> | 11.3 | 282.5 | 565 |
| WPE0284 | IPE0850 | <a href="#">FBM009-050</a> | <a href="#">PBCN10550</a> | 7.1  | 177.5 | 355 |
|         | IPE0851 | <a href="#">FBM009-051</a> | <a href="#">PBCN10551</a> | 7.3  | 182.5 | 365 |

|         |         |                            |                           |      |       |     |
|---------|---------|----------------------------|---------------------------|------|-------|-----|
|         | IPE0852 | <a href="#">FBM009-052</a> | <a href="#">PBCN10552</a> | 3.4  | 85    | 170 |
| WPE0285 | IPE0853 | <a href="#">FBM009-053</a> | <a href="#">PBCN10553</a> | 17.2 | 430   | 860 |
|         | IPE0854 | <a href="#">FBM009-054</a> | <a href="#">PBCN10554</a> | 3.7  | 92.5  | 185 |
|         | IPE0855 | <a href="#">FBM009-055</a> | <a href="#">PBCN10555</a> | 4.4  | 110   | 220 |
| WPE0286 | IPE0856 | <a href="#">FBM009-056</a> | <a href="#">PBCN10556</a> | 9.3  | 232.5 | 465 |
|         | IPE0857 | <a href="#">FBM009-057</a> | <a href="#">PBCN10557</a> | 13.1 | 327.5 | 655 |
|         | IPE0858 | <a href="#">FBM009-058</a> | <a href="#">PBCN10558</a> | 8.2  | 205   | 410 |
| WPE0287 | IPE0859 | <a href="#">FBM009-059</a> | <a href="#">PBCN10559</a> | 13.4 | 335   | 670 |
|         | IPE0860 | <a href="#">FBM009-060</a> | <a href="#">PBCN10560</a> | 7.7  | 192.5 | 385 |
|         | IPE0861 | <a href="#">FBM009-061</a> | <a href="#">PBCN10561</a> | 7.2  | 180   | 360 |
| WPE0288 | IPE0862 | <a href="#">FBM009-062</a> | <a href="#">PBCN10562</a> | 14.0 | 350   | 700 |
|         | IPE0863 | <a href="#">FBM009-063</a> | <a href="#">PBCN10563</a> | 8.5  | 212.5 | 425 |
|         | IPE0864 | <a href="#">FBM009-064</a> | <a href="#">PBCN10564</a> | 9.1  | 227.5 | 455 |
| WPE0289 | IPE0865 | <a href="#">FBM009-065</a> | <a href="#">PBCN10565</a> | 15.2 | 380   | 760 |
|         | IPE0866 | <a href="#">FBM009-066</a> | <a href="#">PBCN10566</a> | 11.6 | 290   | 580 |
|         | IPE0867 | <a href="#">FBM009-067</a> | <a href="#">PBCN10567</a> | 5.5  | 137.5 | 275 |
| WPE0290 | IPE0868 | <a href="#">FBM009-068</a> | <a href="#">PBCN10568</a> | 6.0  | 150   | 300 |
|         | IPE0869 | <a href="#">FBM009-069</a> | <a href="#">PBCN10569</a> | 1.3  | 32.5  | 65  |
|         | IPE0870 | <a href="#">FBM009-070</a> | <a href="#">PBCN10570</a> | 1.8  | 45    | 90  |
| WPE0291 | IPE0871 | <a href="#">FBM009-071</a> | <a href="#">PBCN10571</a> | 9.9  | 247.5 | 495 |
|         | IPE0872 | <a href="#">FBM009-072</a> | <a href="#">PBCN10572</a> | 18.0 | 450   | 900 |
|         | IPE0873 | <a href="#">FBM009-073</a> | <a href="#">PBCN10573</a> | 3.8  | 95    | 190 |
| WPE0292 | IPE0874 | <a href="#">FBM009-074</a> | <a href="#">PBCN10574</a> | 3.5  | 87.5  | 175 |
|         | IPE0875 | <a href="#">FBM009-075</a> | <a href="#">PBCN10575</a> | 5.2  | 130   | 260 |
|         | IPE0876 | <a href="#">FBM009-076</a> | <a href="#">PBCN10576</a> | 11.0 | 275   | 550 |
| WPE0293 | IPE0877 | <a href="#">FBM009-077</a> | <a href="#">PBCN10577</a> | 11.0 | 275   | 550 |
|         | IPE0878 | <a href="#">FBM009-078</a> | <a href="#">PBCN10578</a> | 3.6  | 90    | 180 |
|         | IPE0879 | <a href="#">FBM009-079</a> | <a href="#">PBCN10579</a> | 5.0  | 125   | 250 |
| WPE0294 | IPE0880 | <a href="#">FBM009-080</a> | <a href="#">PBCN10580</a> | 8.2  | 205   | 410 |
|         | IPE0881 | <a href="#">FBM009-081</a> | <a href="#">PBCN10581</a> | 3.2  | 80    | 160 |
|         | IPE0882 | <a href="#">FBM009-082</a> | <a href="#">PBCN10582</a> | 10.2 | 255   | 510 |
| WPE0295 | IPE0883 | <a href="#">FBM009-083</a> | <a href="#">PBCN10583</a> | 4.0  | 100   | 200 |
|         | IPE0884 | <a href="#">FBM009-084</a> | <a href="#">PBCN10584</a> | 5.4  | 135   | 270 |
|         | IPE0885 | <a href="#">FBM009-085</a> | <a href="#">PBCN10585</a> | 18.1 | 452.5 | 905 |
| WPE0296 | IPE0886 | <a href="#">FBM009-086</a> | <a href="#">PBCN10586</a> | 9.1  | 227.5 | 455 |
|         | IPE0887 | <a href="#">FBM009-087</a> | <a href="#">PBCN10587</a> | 12.3 | 307.5 | 615 |
|         | IPE0888 | <a href="#">FBM009-088</a> | <a href="#">PBCN10588</a> | 6.9  | 172.5 | 345 |
| WPE0297 | IPE0889 | <a href="#">FBM009-089</a> | <a href="#">PBCN10589</a> | 9.6  | 240   | 480 |
|         | IPE0890 | <a href="#">FBM009-090</a> | <a href="#">PBCN10590</a> | 2.3  | 57.5  | 115 |

|         |         |                            |                           |      |       |      |
|---------|---------|----------------------------|---------------------------|------|-------|------|
|         | IPE0891 | <a href="#">FBM009-091</a> | <a href="#">PBCN10591</a> | 22.2 | 555   | 1110 |
| WPE0298 | IPE0892 | <a href="#">FBM009-092</a> | <a href="#">PBCN10592</a> | 6.7  | 167.5 | 335  |
|         | IPE0893 | <a href="#">FBM009-093</a> | <a href="#">PBCN10593</a> | 12.2 | 305   | 610  |
|         | IPE0894 | <a href="#">FBM009-094</a> | <a href="#">PBCN10594</a> | 4.1  | 102.5 | 205  |
| WPE0299 | IPE0895 | <a href="#">FBM009-095</a> | <a href="#">PBCN10595</a> | 12.2 | 305   | 610  |
|         | IPE0896 | <a href="#">FBM009-096</a> | <a href="#">PBCN10596</a> | 6.5  | 162.5 | 325  |
|         | IPE0897 | <a href="#">FBM009-097</a> | <a href="#">PBCN10597</a> | 4.0  | 100   | 200  |
| WPE0300 | IPE0898 | <a href="#">FBM009-098</a> | <a href="#">PBCN10598</a> | 14.7 | 367.5 | 735  |
|         | IPE0899 | <a href="#">FBM009-099</a> | <a href="#">PBCN10599</a> | 5.4  | 135   | 270  |
|         | IPE0900 | <a href="#">FBM009-100</a> | <a href="#">PBCN10600</a> | 5.9  | 147.5 | 295  |
| WPE0301 | IPE0901 | <a href="#">FBM010-001</a> | <a href="#">PBCN10601</a> | 5.8  | 145   | 290  |
|         | IPE0902 | <a href="#">FBM010-002</a> | <a href="#">PBCN10602</a> | 7.6  | 190   | 380  |
|         | IPE0903 | <a href="#">FBM010-003</a> | <a href="#">PBCN10603</a> | 3.2  | 80    | 160  |
| WPE0302 | IPE0904 | <a href="#">FBM010-004</a> | <a href="#">PBCN10604</a> | 9.4  | 235   | 470  |
|         | IPE0905 | <a href="#">FBM010-005</a> | <a href="#">PBCN10605</a> | 9.4  | 235   | 470  |
|         | IPE0906 | <a href="#">FBM010-006</a> | <a href="#">PBCN10606</a> | 11.0 | 275   | 550  |
| WPE0303 | IPE0907 | <a href="#">FBM010-007</a> | <a href="#">PBCN10607</a> | 7.6  | 190   | 380  |
|         | IPE0908 | <a href="#">FBM010-008</a> | <a href="#">PBCN10608</a> | 15.9 | 397.5 | 795  |
|         | IPE0909 | <a href="#">FBM010-009</a> | <a href="#">PBCN10609</a> | 14.5 | 362.5 | 725  |
| WPE0304 | IPE0910 | <a href="#">FBM010-010</a> | <a href="#">PBCN10610</a> | 9.8  | 245   | 490  |
|         | IPE0911 | <a href="#">FBM010-011</a> | <a href="#">PBCN10611</a> | 7.4  | 185   | 370  |
|         | IPE0912 | <a href="#">FBM010-012</a> | <a href="#">PBCN10612</a> | 8.6  | 215   | 430  |
| WPE0305 | IPE0913 | <a href="#">FBM010-013</a> | <a href="#">PBCN10613</a> | 8.0  | 200   | 400  |
|         | IPE0914 | <a href="#">FBM010-014</a> | <a href="#">PBCN10614</a> | 4.7  | 117.5 | 235  |
|         | IPE0915 | <a href="#">FBM010-015</a> | <a href="#">PBCN10615</a> | 11.7 | 292.5 | 585  |
| WPE0306 | IPE0916 | <a href="#">FBM010-016</a> | <a href="#">PBCN10616</a> | 7.1  | 177.5 | 355  |
|         | IPE0917 | <a href="#">FBM010-017</a> | <a href="#">PBCN10617</a> | 4.2  | 105   | 210  |
|         | IPE0918 | <a href="#">FBM010-018</a> | <a href="#">PBCN10618</a> | 15.1 | 377.5 | 755  |
| WPE0307 | IPE0919 | <a href="#">FBM010-019</a> | <a href="#">PBCN10619</a> | 11.8 | 295   | 590  |
|         | IPE0920 | <a href="#">FBM010-020</a> | <a href="#">PBCN10620</a> | 3.6  | 90    | 180  |
|         | IPE0921 | <a href="#">FBM010-021</a> | <a href="#">PBCN10621</a> | 9.0  | 225   | 450  |
| WPE0308 | IPE0922 | <a href="#">FBM010-022</a> | <a href="#">PBCN10622</a> | 15.7 | 392.5 | 785  |
|         | IPE0923 | <a href="#">FBM010-023</a> | <a href="#">PBCN10623</a> | 5.9  | 147.5 | 295  |
|         | IPE0924 | <a href="#">FBM010-024</a> | <a href="#">PBCN10624</a> | 15.4 | 385   | 770  |
| WPE0309 | IPE0925 | <a href="#">FBM010-025</a> | <a href="#">PBCN10625</a> | 11.1 | 277.5 | 555  |
|         | IPE0926 | <a href="#">FBM010-026</a> | <a href="#">PBCN10626</a> | 8.9  | 222.5 | 445  |
|         | IPE0927 | <a href="#">FBM010-027</a> | <a href="#">PBCN10627</a> | 14.3 | 357.5 | 715  |
| WPE0310 | IPE0928 | <a href="#">FBM010-028</a> | <a href="#">PBCN10628</a> | 18.7 | 467.5 | 935  |
|         | IPE0929 | <a href="#">FBM010-029</a> | <a href="#">PBCN10629</a> | 13.8 | 345   | 690  |



|         |         |                            |                           |      |       |     |
|---------|---------|----------------------------|---------------------------|------|-------|-----|
|         | IPE0930 | <a href="#">FBM010-030</a> | <a href="#">PBCN10630</a> | 9.4  | 235   | 470 |
| WPE0311 | IPE0931 | <a href="#">FBM010-031</a> | <a href="#">PBCN10631</a> | 9.5  | 237.5 | 475 |
|         | IPE0932 | <a href="#">FBM010-032</a> | <a href="#">PBCN10632</a> | 12.3 | 307.5 | 615 |
|         | IPE0933 | <a href="#">FBM010-033</a> | <a href="#">PBCN10633</a> | 7.5  | 187.5 | 375 |
| WPE0312 | IPE0934 | <a href="#">FBM010-034</a> | <a href="#">PBCN10634</a> | 6.7  | 167.5 | 335 |
|         | IPE0935 | <a href="#">FBM010-035</a> | <a href="#">PBCN10635</a> | 4.3  | 107.5 | 215 |
|         | IPE0936 | <a href="#">FBM010-036</a> | <a href="#">PBCN10636</a> | 10.7 | 267.5 | 535 |
| WPE0313 | IPE0937 | <a href="#">FBM010-037</a> | <a href="#">PBCN10637</a> | 5.7  | 142.5 | 285 |
|         | IPE0938 | <a href="#">FBM010-038</a> | <a href="#">PBCN10638</a> | 10.1 | 252.5 | 505 |
|         | IPE0939 | <a href="#">FBM010-039</a> | <a href="#">PBCN10639</a> | 8.1  | 202.5 | 405 |
| WPE0314 | IPE0940 | <a href="#">FBM010-040</a> | <a href="#">PBCN10640</a> | 12.8 | 320   | 640 |
|         | IPE0941 | <a href="#">FBM010-041</a> | <a href="#">PBCN10641</a> | 9.0  | 225   | 450 |
|         | IPE0942 | <a href="#">FBM010-042</a> | <a href="#">PBCN10642</a> | 9.1  | 227.5 | 455 |
| WPE0315 | IPE0943 | <a href="#">FBM010-043</a> | <a href="#">PBCN10643</a> | 6.2  | 155   | 310 |
|         | IPE0944 | <a href="#">FBM010-044</a> | <a href="#">PBCN10644</a> | 2.8  | 70    | 140 |
|         | IPE0945 | <a href="#">FBM010-045</a> | <a href="#">PBCN10645</a> | 10.8 | 270   | 540 |
| WPE0316 | IPE0946 | <a href="#">FBM010-046</a> | <a href="#">PBCN10646</a> | 16.5 | 412.5 | 825 |
|         | IPE0947 | <a href="#">FBM010-047</a> | <a href="#">PBCN10647</a> | 7.1  | 177.5 | 355 |
|         | IPE0948 | <a href="#">FBM010-048</a> | <a href="#">PBCN10648</a> | 7.1  | 177.5 | 355 |
| WPE0317 | IPE0949 | <a href="#">FBM010-049</a> | <a href="#">PBCN10649</a> | 11.4 | 285   | 570 |
|         | IPE0950 | <a href="#">FBM010-050</a> | <a href="#">PBCN10650</a> | 7.7  | 192.5 | 385 |
|         | IPE0951 | <a href="#">FBM010-051</a> | <a href="#">PBCN10651</a> | 8.1  | 202.5 | 405 |
| WPE0318 | IPE0952 | <a href="#">FBM010-052</a> | <a href="#">PBCN10652</a> | 11.9 | 297.5 | 595 |
|         | IPE0953 | <a href="#">FBM010-053</a> | <a href="#">PBCN10653</a> | 11.5 | 287.5 | 575 |
|         | IPE0954 | <a href="#">FBM010-054</a> | <a href="#">PBCN10654</a> | 7.6  | 190   | 380 |
| WPE0319 | IPE0955 | <a href="#">FBM010-055</a> | <a href="#">PBCN10655</a> | 4.0  | 100   | 200 |
|         | IPE0956 | <a href="#">FBM010-056</a> | <a href="#">PBCN10656</a> | 8.0  | 200   | 400 |
|         | IPE0957 | <a href="#">FBM010-057</a> | <a href="#">PBCN10657</a> | 11.1 | 277.5 | 555 |
| WPE0320 | IPE0958 | <a href="#">FBM010-058</a> | <a href="#">PBCN10658</a> | 11.0 | 275   | 550 |
|         | IPE0959 | <a href="#">FBM010-059</a> | <a href="#">PBCN10659</a> | 9.3  | 232.5 | 465 |
|         | IPE0960 | <a href="#">FBM010-060</a> | <a href="#">PBCN10660</a> | 7.8  | 195   | 390 |
| WPE0321 | IPE0961 | <a href="#">FBM010-061</a> | <a href="#">PBCN10661</a> | 2.6  | 65    | 130 |
|         | IPE0962 | <a href="#">FBM010-062</a> | <a href="#">PBCN10662</a> | 2.9  | 72.5  | 145 |
|         | IPE0963 | <a href="#">FBM010-063</a> | <a href="#">PBCN10663</a> | 10.6 | 265   | 530 |
| WPE0322 | IPE0964 | <a href="#">FBM010-064</a> | <a href="#">PBCN10664</a> | 14.0 | 350   | 700 |
|         | IPE0965 | <a href="#">FBM010-065</a> | <a href="#">PBCN10665</a> | 7.1  | 177.5 | 355 |
|         | IPE0966 | <a href="#">FBM010-066</a> | <a href="#">PBCN10666</a> | 10.6 | 265   | 530 |
| WPE0323 | IPE0967 | <a href="#">FBM010-067</a> | <a href="#">PBCN10667</a> | 8.8  | 220   | 440 |
|         | IPE0968 | <a href="#">FBM010-068</a> | <a href="#">PBCN10668</a> | 11.1 | 277.5 | 555 |

|         |         |                            |                           |      |       |     |
|---------|---------|----------------------------|---------------------------|------|-------|-----|
|         | IPE0969 | <a href="#">FBM010-069</a> | <a href="#">PBCN10669</a> | 8.4  | 210   | 420 |
| WPE0324 | IPE0970 | <a href="#">FBM010-070</a> | <a href="#">PBCN10670</a> | 12.7 | 317.5 | 635 |
|         | IPE0971 | <a href="#">FBM010-071</a> | <a href="#">PBCN10671</a> | 4.8  | 120   | 240 |
|         | IPE0972 | <a href="#">FBM010-072</a> | <a href="#">PBCN10672</a> | 10.0 | 250   | 500 |
| WPE0325 | IPE0973 | <a href="#">FBM010-073</a> | <a href="#">PBCN10673</a> | 8.0  | 200   | 400 |
|         | IPE0974 | <a href="#">FBM010-074</a> | <a href="#">PBCN10674</a> | 3.3  | 82.5  | 165 |
|         | IPE0975 | <a href="#">FBM010-075</a> | <a href="#">PBCN10675</a> | 3.6  | 90    | 180 |
| WPE0326 | IPE0976 | <a href="#">FBM010-076</a> | <a href="#">PBCN10676</a> | 10.5 | 262.5 | 525 |
|         | IPE0977 | <a href="#">FBM010-077</a> | <a href="#">PBCN10677</a> | 17.2 | 430   | 860 |
|         | IPE0978 | <a href="#">FBM010-078</a> | <a href="#">PBCN10678</a> | 7.5  | 187.5 | 375 |
| WPE0327 | IPE0979 | <a href="#">FBM010-079</a> | <a href="#">PBCN10679</a> | 7.3  | 182.5 | 365 |
|         | IPE0980 | <a href="#">FBM010-080</a> | <a href="#">PBCN10680</a> | 6.6  | 165   | 330 |
|         | IPE0981 | <a href="#">FBM010-081</a> | <a href="#">PBCN10681</a> | 10.3 | 257.5 | 515 |
| WPE0328 | IPE0982 | <a href="#">FBM010-082</a> | <a href="#">PBCN10682</a> | 7.7  | 192.5 | 385 |
|         | IPE0983 | <a href="#">FBM010-083</a> | <a href="#">PBCN10683</a> | 11.8 | 295   | 590 |
|         | IPE0984 | <a href="#">FBM010-084</a> | <a href="#">PBCN10684</a> | 10.0 | 250   | 500 |
| WPE0329 | IPE0985 | <a href="#">FBM010-085</a> | <a href="#">PBCN10685</a> | 6.0  | 150   | 300 |
|         | IPE0986 | <a href="#">FBM010-086</a> | <a href="#">PBCN10686</a> | 6.1  | 152.5 | 305 |
|         | IPE0987 | <a href="#">FBM010-087</a> | <a href="#">PBCN10687</a> | 9.0  | 225   | 450 |
| WPE0330 | IPE0988 | <a href="#">FBM010-088</a> | <a href="#">PBCN10688</a> | 8.0  | 200   | 400 |
|         | IPE0989 | <a href="#">FBM010-089</a> | <a href="#">PBCN10689</a> | 6.0  | 150   | 300 |
|         | IPE0990 | <a href="#">FBM010-090</a> | <a href="#">PBCN10690</a> | 5.9  | 147.5 | 295 |
| WPE0331 | IPE0991 | <a href="#">FBM010-091</a> | <a href="#">PBCN10691</a> | 7.1  | 177.5 | 355 |
|         | IPE0992 | <a href="#">FBM010-092</a> | <a href="#">PBCN10692</a> | 10.1 | 252.5 | 505 |
|         | IPE0993 | <a href="#">FBM010-093</a> | <a href="#">PBCN10693</a> | 13.0 | 325   | 650 |
| WPE0332 | IPE0994 | <a href="#">FBM010-094</a> | <a href="#">PBCN10694</a> | 7.2  | 180   | 360 |
|         | IPE0995 | <a href="#">FBM010-095</a> | <a href="#">PBCN10695</a> | 14.2 | 355   | 710 |
|         | IPE0996 | <a href="#">FBM010-096</a> | <a href="#">PBCN10696</a> | 3.7  | 92.5  | 185 |
| WPE0333 | IPE0997 | <a href="#">FBM010-097</a> | <a href="#">PBCN10697</a> | 8.2  | 205   | 410 |
|         | IPE0998 | <a href="#">FBM010-098</a> | <a href="#">PBCN10698</a> | 9.6  | 240   | 480 |
|         | IPE0999 | <a href="#">FBM010-099</a> | <a href="#">PBCN10699</a> | 17.7 | 442.5 | 885 |
| WPE0334 | IPE1000 | <a href="#">FBM010-100</a> | <a href="#">PBCN10700</a> | 7.5  | 187.5 | 375 |
|         | IPE1001 | <a href="#">FBM011-001</a> | <a href="#">PBNP10001</a> | 5.6  | 140   | 280 |
|         | IPE1002 | <a href="#">FBM011-002</a> | <a href="#">PBNP10002</a> | 12.8 | 320   | 640 |
| WPE0335 | IPE1003 | <a href="#">FBM011-003</a> | <a href="#">PBNP10003</a> | 5.5  | 137.5 | 275 |
|         | IPE1004 | <a href="#">FBM011-004</a> | <a href="#">PBNP10004</a> | 2.0  | 50    | 100 |
|         | IPE1005 | <a href="#">FBM011-005</a> | <a href="#">PBNP10005</a> | 5.0  | 125   | 250 |
| WPE0336 | IPE1006 | <a href="#">FBM011-006</a> | <a href="#">PBNP10006</a> | 3.7  | 92.5  | 185 |
|         | IPE1007 | <a href="#">FBM011-007</a> | <a href="#">PBNP10007</a> | 12.1 | 302.5 | 605 |

|         |         |                            |                           |      |       |     |
|---------|---------|----------------------------|---------------------------|------|-------|-----|
|         | IPE1008 | <a href="#">FBM011-008</a> | <a href="#">PBNP10008</a> | 5.7  | 142.5 | 285 |
| WPE0337 | IPE1009 | <a href="#">FBM011-009</a> | <a href="#">PBNP10009</a> | 2.7  | 67.5  | 135 |
|         | IPE1010 | <a href="#">FBM011-010</a> | <a href="#">PBNP10010</a> | 6.9  | 172.5 | 345 |
|         | IPE1011 | <a href="#">FBM011-011</a> | <a href="#">PBNP10011</a> | 3.4  | 85    | 170 |
| WPE0338 | IPE1012 | <a href="#">FBM011-012</a> | <a href="#">PBNP10012</a> | 10.8 | 270   | 540 |
|         | IPE1013 | <a href="#">FBM011-013</a> | <a href="#">PBNP10013</a> | 5.2  | 130   | 260 |
|         | IPE1014 | <a href="#">FBM011-014</a> | <a href="#">PBNP10014</a> | 7.4  | 185   | 370 |
| WPE0339 | IPE1015 | <a href="#">FBM011-015</a> | <a href="#">PBNP10015</a> | 4.6  | 115   | 230 |
|         | IPE1016 | <a href="#">FBM011-016</a> | <a href="#">PBNP10016</a> | 11.6 | 290   | 580 |
|         | IPE1017 | <a href="#">FBM011-017</a> | <a href="#">PBNP10017</a> | 11.7 | 292.5 | 585 |
| WPE0340 | IPE1018 | <a href="#">FBM011-018</a> | <a href="#">PBNP10018</a> | 5.4  | 135   | 270 |
|         | IPE1019 | <a href="#">FBM011-019</a> | <a href="#">PBNP10019</a> | 8.1  | 202.5 | 405 |
|         | IPE1020 | <a href="#">FBM011-020</a> | <a href="#">PBNP10020</a> | 5.4  | 135   | 270 |
| WPE0341 | IPE1021 | <a href="#">FBM011-021</a> | <a href="#">PBNP10021</a> | 13.6 | 340   | 680 |
|         | IPE1022 | <a href="#">FBM011-022</a> | <a href="#">PBNP10022</a> | 18.8 | 470   | 940 |
|         | IPE1023 | <a href="#">FBM011-023</a> | <a href="#">PBNP10023</a> | 3.3  | 82.5  | 165 |
| WPE0342 | IPE1024 | <a href="#">FBM011-024</a> | <a href="#">PBNP10024</a> | 5.7  | 142.5 | 285 |
|         | IPE1025 | <a href="#">FBM011-025</a> | <a href="#">PBNP10025</a> | 12.3 | 307.5 | 615 |
|         | IPE1026 | <a href="#">FBM011-026</a> | <a href="#">PBNP10026</a> | 5.3  | 132.5 | 265 |
| WPE0343 | IPE1027 | <a href="#">FBM011-027</a> | <a href="#">PBNP10027</a> | 4.5  | 112.5 | 225 |
|         | IPE1028 | <a href="#">FBM011-028</a> | <a href="#">PBNP10028</a> | 6.6  | 165   | 330 |
|         | IPE1029 | <a href="#">FBM011-029</a> | <a href="#">PBNP10029</a> | 7.3  | 182.5 | 365 |
| WPE0344 | IPE1030 | <a href="#">FBM011-030</a> | <a href="#">PBNP10030</a> | 5.6  | 140   | 280 |
|         | IPE1031 | <a href="#">FBM011-031</a> | <a href="#">PBNP10031</a> | 5.3  | 132.5 | 265 |
|         | IPE1032 | <a href="#">FBM011-032</a> | <a href="#">PBNP10032</a> | 6.9  | 172.5 | 345 |
| WPE0345 | IPE1033 | <a href="#">FBM011-033</a> | <a href="#">PBNP10033</a> | 4.5  | 112.5 | 225 |
|         | IPE1034 | <a href="#">FBM011-034</a> | <a href="#">PBNP10034</a> | 8.2  | 205   | 410 |
|         | IPE1035 | <a href="#">FBM011-035</a> | <a href="#">PBNP10035</a> | 6.3  | 157.5 | 315 |
| WPE0346 | IPE1036 | <a href="#">FBM011-036</a> | <a href="#">PBNP10036</a> | 9.1  | 227.5 | 455 |
|         | IPE1037 | <a href="#">FBM011-037</a> | <a href="#">PBNP10037</a> | 9.1  | 227.5 | 455 |
|         | IPE1038 | <a href="#">FBM011-038</a> | <a href="#">PBNP10038</a> | 13.4 | 335   | 670 |
| WPE0347 | IPE1039 | <a href="#">FBM011-039</a> | <a href="#">PBNP10039</a> | 5.2  | 130   | 260 |
|         | IPE1040 | <a href="#">FBM011-040</a> | <a href="#">PBNP10040</a> | 4.9  | 122.5 | 245 |
|         | IPE1041 | <a href="#">FBM011-041</a> | <a href="#">PBNP10041</a> | 2.6  | 65    | 130 |
| WPE0348 | IPE1042 | <a href="#">FBM011-042</a> | <a href="#">PBNP10042</a> | 3.9  | 97.5  | 195 |
|         | IPE1043 | <a href="#">FBM011-043</a> | <a href="#">PBNP10043</a> | 16.0 | 400   | 800 |
|         | IPE1044 | <a href="#">FBM011-044</a> | <a href="#">PBNP10044</a> | 13.3 | 332.5 | 665 |
| WPE0349 | IPE1045 | <a href="#">FBM011-045</a> | <a href="#">PBNP10045</a> | 9.1  | 227.5 | 455 |
|         | IPE1046 | <a href="#">FBM011-046</a> | <a href="#">PBNP10046</a> | 3.7  | 92.5  | 185 |

|         |         |                            |                           |      |       |     |
|---------|---------|----------------------------|---------------------------|------|-------|-----|
|         | IPE1047 | <a href="#">FBM011-047</a> | <a href="#">PBNP10047</a> | 5.9  | 147.5 | 295 |
| WPE0350 | IPE1048 | <a href="#">FBM011-048</a> | <a href="#">PBNP10048</a> | 9.0  | 225   | 450 |
|         | IPE1049 | <a href="#">FBM011-049</a> | <a href="#">PBNP10049</a> | 13.3 | 332.5 | 665 |
|         | IPE1050 | <a href="#">FBM011-050</a> | <a href="#">PBNP10050</a> | 3.9  | 97.5  | 195 |
| WPE0351 | IPE1051 | <a href="#">FBM011-051</a> | <a href="#">PBNP10051</a> | 4.7  | 117.5 | 235 |
|         | IPE1052 | <a href="#">FBM011-052</a> | <a href="#">PBNP10052</a> | 4.0  | 100   | 200 |
|         | IPE1053 | <a href="#">FBM011-053</a> | <a href="#">PBNP10053</a> | 2.9  | 72.5  | 145 |
| WPE0352 | IPE1054 | <a href="#">FBM011-054</a> | <a href="#">PBNP10054</a> | 8.7  | 217.5 | 435 |
|         | IPE1055 | <a href="#">FBM011-055</a> | <a href="#">PBNP10055</a> | 4.0  | 100   | 200 |
|         | IPE1056 | <a href="#">FBM011-056</a> | <a href="#">PBNP10056</a> | 8.0  | 200   | 400 |
| WPE0353 | IPE1057 | <a href="#">FBM011-057</a> | <a href="#">PBNP10057</a> | 6.4  | 160   | 320 |
|         | IPE1058 | <a href="#">FBM011-058</a> | <a href="#">PBNP10058</a> | 3.5  | 87.5  | 175 |
|         | IPE1059 | <a href="#">FBM011-059</a> | <a href="#">PBNP10059</a> | 3.3  | 82.5  | 165 |
| WPE0354 | IPE1060 | <a href="#">FBM011-060</a> | <a href="#">PBNP10060</a> | 4.3  | 107.5 | 215 |
|         | IPE1061 | <a href="#">FBM011-061</a> | <a href="#">PBNP10061</a> | 4.1  | 102.5 | 205 |
|         | IPE1062 | <a href="#">FBM011-062</a> | <a href="#">PBNP10062</a> | 6.0  | 150   | 300 |
| WPE0355 | IPE1063 | <a href="#">FBM011-063</a> | <a href="#">PBNP10063</a> | 16.0 | 400   | 800 |
|         | IPE1064 | <a href="#">FBM011-064</a> | <a href="#">PBNP10064</a> | 7.8  | 195   | 390 |
|         | IPE1065 | <a href="#">FBM011-065</a> | <a href="#">PBNP10065</a> | 12.7 | 317.5 | 635 |
| WPE0356 | IPE1066 | <a href="#">FBM011-066</a> | <a href="#">PBNP10066</a> | 8.1  | 202.5 | 405 |
|         | IPE1067 | <a href="#">FBM011-067</a> | <a href="#">PBNP10067</a> | 10.6 | 265   | 530 |
|         | IPE1068 | <a href="#">FBM011-068</a> | <a href="#">PBNP10068</a> | 4.9  | 122.5 | 245 |
| WPE0357 | IPE1069 | <a href="#">FBM011-069</a> | <a href="#">PBNP10069</a> | 11.7 | 292.5 | 585 |
|         | IPE1070 | <a href="#">FBM011-070</a> | <a href="#">PBNP10070</a> | 9.6  | 240   | 480 |
|         | IPE1071 | <a href="#">FBM011-071</a> | <a href="#">PBNP10071</a> | 12.2 | 305   | 610 |
| WPE0358 | IPE1072 | <a href="#">FBM011-072</a> | <a href="#">PBNP10072</a> | 15.9 | 397.5 | 795 |
|         | IPE1073 | <a href="#">FBM011-073</a> | <a href="#">PBNP10073</a> | 7.0  | 175   | 350 |
|         | IPE1074 | <a href="#">FBM011-074</a> | <a href="#">PBNP10074</a> | 13.3 | 332.5 | 665 |
| WPE0359 | IPE1075 | <a href="#">FBM011-075</a> | <a href="#">PBNP10075</a> | 4.1  | 102.5 | 205 |
|         | IPE1076 | <a href="#">FBM011-076</a> | <a href="#">PBNP10076</a> | 4.0  | 100   | 200 |
|         | IPE1077 | <a href="#">FBM011-077</a> | <a href="#">PBNP10077</a> | 8.5  | 212.5 | 425 |
| WPE0360 | IPE1078 | <a href="#">FBM011-078</a> | <a href="#">PBNP10078</a> | 4.2  | 105   | 210 |
|         | IPE1079 | <a href="#">FBM011-079</a> | <a href="#">PBNP10079</a> | 5.1  | 127.5 | 255 |
|         | IPE1080 | <a href="#">FBM011-080</a> | <a href="#">PBNP10080</a> | 2.8  | 70    | 140 |
| WPE0361 | IPE1081 | <a href="#">FBM011-081</a> | <a href="#">PBNP10081</a> | 16.5 | 412.5 | 825 |
|         | IPE1082 | <a href="#">FBM011-082</a> | <a href="#">PBNP10082</a> | 8.4  | 210   | 420 |
|         | IPE1083 | <a href="#">FBM011-083</a> | <a href="#">PBNP10083</a> | 13.9 | 347.5 | 695 |
| WPE0362 | IPE1084 | <a href="#">FBM011-084</a> | <a href="#">PBNP10084</a> | 6.7  | 167.5 | 335 |
|         | IPE1085 | <a href="#">FBM011-085</a> | <a href="#">PBNP10085</a> | 8.5  | 212.5 | 425 |

|         |         |                            |                           |      |       |      |
|---------|---------|----------------------------|---------------------------|------|-------|------|
|         | IPE1086 | <a href="#">FBM011-086</a> | <a href="#">PBNP10086</a> | 5.9  | 147.5 | 295  |
| WPE0363 | IPE1087 | <a href="#">FBM011-087</a> | <a href="#">PBNP10087</a> | 3.2  | 80    | 160  |
|         | IPE1088 | <a href="#">FBM011-088</a> | <a href="#">PBNP10088</a> | 4.0  | 100   | 200  |
|         | IPE1089 | <a href="#">FBM011-089</a> | <a href="#">PBNP10089</a> | 10.5 | 262.5 | 525  |
| WPE0364 | IPE1090 | <a href="#">FBM011-090</a> | <a href="#">PBNP10090</a> | 3.6  | 90    | 180  |
|         | IPE1091 | <a href="#">FBM011-091</a> | <a href="#">PBNP10091</a> | 15.2 | 380   | 760  |
|         | IPE1092 | <a href="#">FBM011-092</a> | <a href="#">PBNP10092</a> | 11.4 | 285   | 570  |
| WPE0365 | IPE1093 | <a href="#">FBM011-093</a> | <a href="#">PBNP10093</a> | 17.0 | 425   | 850  |
|         | IPE1094 | <a href="#">FBM011-094</a> | <a href="#">PBNP10094</a> | 18.0 | 450   | 900  |
|         | IPE1095 | <a href="#">FBM011-095</a> | <a href="#">PBNP10095</a> | 19.7 | 492.5 | 985  |
| WPE0366 | IPE1096 | <a href="#">FBM011-096</a> | <a href="#">PBNP10096</a> | 5.1  | 127.5 | 255  |
|         | IPE1097 | <a href="#">FBM011-097</a> | <a href="#">PBNP10097</a> | 7.1  | 177.5 | 355  |
|         | IPE1098 | <a href="#">FBM011-098</a> | <a href="#">PBNP10098</a> | 5.7  | 142.5 | 285  |
| WPE0367 | IPE1099 | <a href="#">FBM011-099</a> | <a href="#">PBNP10099</a> | 13.6 | 340   | 680  |
|         | IPE1100 | <a href="#">FBM011-100</a> | <a href="#">PBNP10100</a> | 10.2 | 255   | 510  |
|         | IPE1101 | <a href="#">FBM012-001</a> | <a href="#">PBCN10701</a> | 5.3  | 132.5 | 265  |
| WPE0368 | IPE1102 | <a href="#">FBM012-002</a> | <a href="#">PBCN10702</a> | 7.5  | 187.5 | 375  |
|         | IPE1103 | <a href="#">FBM012-003</a> | <a href="#">PBCN10703</a> | 8.6  | 215   | 430  |
|         | IPE1104 | <a href="#">FBM012-004</a> | <a href="#">PBCN10704</a> | 2.9  | 72.5  | 145  |
| WPE0369 | IPE1105 | <a href="#">FBM012-005</a> | <a href="#">PBCN10705</a> | 5.3  | 132.5 | 265  |
|         | IPE1106 | <a href="#">FBM012-006</a> | <a href="#">PBCN10706</a> | 7.1  | 177.5 | 355  |
|         | IPE1107 | <a href="#">FBM012-007</a> | <a href="#">PBCN10707</a> | 11.7 | 292.5 | 585  |
| WPE0370 | IPE1108 | <a href="#">FBM012-008</a> | <a href="#">PBCN10708</a> | 8.7  | 217.5 | 435  |
|         | IPE1109 | <a href="#">FBM012-009</a> | <a href="#">PBCN10709</a> | 6.0  | 150   | 300  |
|         | IPE1110 | <a href="#">FBM012-010</a> | <a href="#">PBCN10710</a> | 9.1  | 227.5 | 455  |
| WPE0371 | IPE1111 | <a href="#">FBM012-011</a> | <a href="#">PBCN10711</a> | 9.1  | 227.5 | 455  |
|         | IPE1112 | <a href="#">FBM012-012</a> | <a href="#">PBCN10712</a> | 2.5  | 62.5  | 125  |
|         | IPE1113 | <a href="#">FBM012-013</a> | <a href="#">PBCN10713</a> | 10.6 | 265   | 530  |
| WPE0372 | IPE1114 | <a href="#">FBM012-014</a> | <a href="#">PBCN10714</a> | 3.8  | 95    | 190  |
|         | IPE1115 | <a href="#">FBM012-015</a> | <a href="#">PBCN10715</a> | 6.0  | 150   | 300  |
|         | IPE1116 | <a href="#">FBM012-016</a> | <a href="#">PBCN10716</a> | 2.8  | 70    | 140  |
| WPE0373 | IPE1117 | <a href="#">FBM012-017</a> | <a href="#">PBCN10717</a> | 6.0  | 150   | 300  |
|         | IPE1118 | <a href="#">FBM012-018</a> | <a href="#">PBCN10718</a> | 15.1 | 377.5 | 755  |
|         | IPE1119 | <a href="#">FBM012-019</a> | <a href="#">PBCN10719</a> | 4.9  | 122.5 | 245  |
| WPE0374 | IPE1120 | <a href="#">FBM012-020</a> | <a href="#">PBCN10720</a> | 3.0  | 75    | 150  |
|         | IPE1121 | <a href="#">FBM012-021</a> | <a href="#">PBCN10721</a> | 7.4  | 185   | 370  |
|         | IPE1122 | <a href="#">FBM012-022</a> | <a href="#">PBCN10722</a> | 18.0 | 450   | 900  |
| WPE0375 | IPE1123 | <a href="#">FBM012-023</a> | <a href="#">PBCN10723</a> | 15.3 | 382.5 | 765  |
|         | IPE1124 | <a href="#">FBM012-024</a> | <a href="#">PBCN10724</a> | 20.3 | 507.5 | 1015 |

|         |         |                            |                           |      |       |     |
|---------|---------|----------------------------|---------------------------|------|-------|-----|
|         | IPE1125 | <a href="#">FBM012-025</a> | <a href="#">PBCN10725</a> | 6.3  | 157.5 | 315 |
| WPE0376 | IPE1126 | <a href="#">FBM012-026</a> | <a href="#">PBCN10726</a> | 3.0  | 75    | 150 |
|         | IPE1127 | <a href="#">FBM012-027</a> | <a href="#">PBCN10727</a> | 7.9  | 197.5 | 395 |
|         | IPE1128 | <a href="#">FBM012-028</a> | <a href="#">PBCN10728</a> | 3.9  | 97.5  | 195 |
| WPE0377 | IPE1129 | <a href="#">FBM012-029</a> | <a href="#">PBCN10729</a> | 16.3 | 407.5 | 815 |
|         | IPE1130 | <a href="#">FBM012-030</a> | <a href="#">PBCN10730</a> | 4.9  | 122.5 | 245 |
|         | IPE1131 | <a href="#">FBM012-031</a> | <a href="#">PBCN10731</a> | 5.2  | 130   | 260 |
| WPE0378 | IPE1132 | <a href="#">FBM012-032</a> | <a href="#">PBCN10732</a> | 6.5  | 162.5 | 325 |
|         | IPE1133 | <a href="#">FBM012-033</a> | <a href="#">PBCN10733</a> | 5.9  | 147.5 | 295 |
|         | IPE1134 | <a href="#">FBM012-034</a> | <a href="#">PBCN10734</a> | 11.4 | 285   | 570 |
| WPE0379 | IPE1135 | <a href="#">FBM012-035</a> | <a href="#">PBCN10735</a> | 2.7  | 67.5  | 135 |
|         | IPE1136 | <a href="#">FBM012-036</a> | <a href="#">PBCN10736</a> | 3.6  | 90    | 180 |
|         | IPE1137 | <a href="#">FBM012-037</a> | <a href="#">PBCN10737</a> | 3.8  | 95    | 190 |
| WPE0380 | IPE1138 | <a href="#">FBM012-038</a> | <a href="#">PBCN10738</a> | 3.8  | 95    | 190 |
|         | IPE1139 | <a href="#">FBM012-039</a> | <a href="#">PBCN10739</a> | 11.3 | 282.5 | 565 |
|         | IPE1140 | <a href="#">FBM012-040</a> | <a href="#">PBCN10740</a> | 12.9 | 322.5 | 645 |
| WPE0381 | IPE1141 | <a href="#">FBM012-041</a> | <a href="#">PBCN10741</a> | 8.7  | 217.5 | 435 |
|         | IPE1142 | <a href="#">FBM012-042</a> | <a href="#">PBCN10742</a> | 3.5  | 87.5  | 175 |
|         | IPE1143 | <a href="#">FBM012-043</a> | <a href="#">PBCN10743</a> | 16.6 | 415   | 830 |
| WPE0382 | IPE1144 | <a href="#">FBM012-044</a> | <a href="#">PBCN10744</a> | 12.8 | 320   | 640 |
|         | IPE1145 | <a href="#">FBM012-045</a> | <a href="#">PBCN10745</a> | 4.5  | 112.5 | 225 |
|         | IPE1146 | <a href="#">FBM012-046</a> | <a href="#">PBCN10746</a> | 2.8  | 70    | 140 |
| WPE0383 | IPE1147 | <a href="#">FBM012-047</a> | <a href="#">PBCN10747</a> | 8.2  | 205   | 410 |
|         | IPE1148 | <a href="#">FBM012-048</a> | <a href="#">PBCN10748</a> | 13.4 | 335   | 670 |
|         | IPE1149 | <a href="#">FBM012-049</a> | <a href="#">PBCN10749</a> | 6.4  | 160   | 320 |
| WPE0384 | IPE1150 | <a href="#">FBM012-050</a> | <a href="#">PBCN10750</a> | 6.3  | 157.5 | 315 |
|         | IPE1151 | <a href="#">FBM012-051</a> | <a href="#">PBCN10751</a> | 8.2  | 205   | 410 |
|         | IPE1152 | <a href="#">FBM012-052</a> | <a href="#">PBCN10752</a> | 5.6  | 140   | 280 |
| WPE0385 | IPE1153 | <a href="#">FBM012-053</a> | <a href="#">PBCN10753</a> | 8.1  | 202.5 | 405 |
|         | IPE1154 | <a href="#">FBM012-054</a> | <a href="#">PBCN10754</a> | 15.6 | 390   | 780 |
|         | IPE1155 | <a href="#">FBM012-055</a> | <a href="#">PBCN10755</a> | 6.4  | 160   | 320 |
| WPE0386 | IPE1156 | <a href="#">FBM012-056</a> | <a href="#">PBCN10756</a> | 7.5  | 187.5 | 375 |
|         | IPE1157 | <a href="#">FBM012-057</a> | <a href="#">PBCN10757</a> | 3.2  | 80    | 160 |
|         | IPE1158 | <a href="#">FBM012-058</a> | <a href="#">PBCN10758</a> | 7.7  | 192.5 | 385 |
| WPE0387 | IPE1159 | <a href="#">FBM012-059</a> | <a href="#">PBCN10759</a> | 9.3  | 232.5 | 465 |
|         | IPE1160 | <a href="#">FBM012-060</a> | <a href="#">PBCN10760</a> | 11.6 | 290   | 580 |
|         | IPE1161 | <a href="#">FBM012-061</a> | <a href="#">PBCN10761</a> | 12.3 | 307.5 | 615 |
| WPE0388 | IPE1162 | <a href="#">FBM012-062</a> | <a href="#">PBCN10762</a> | 8.4  | 210   | 420 |
|         | IPE1163 | <a href="#">FBM012-063</a> | <a href="#">PBCN10763</a> | 4.9  | 122.5 | 245 |

|         |         |                            |                           |      |       |     |
|---------|---------|----------------------------|---------------------------|------|-------|-----|
|         | IPE1164 | <a href="#">FBM012-064</a> | <a href="#">PBCN10764</a> | 9.7  | 242.5 | 485 |
| WPE0389 | IPE1165 | <a href="#">FBM012-065</a> | <a href="#">PBCN10765</a> | 8.2  | 205   | 410 |
|         | IPE1166 | <a href="#">FBM012-066</a> | <a href="#">PBCN10766</a> | 5.5  | 137.5 | 275 |
|         | IPE1167 | <a href="#">FBM012-067</a> | <a href="#">PBCN10767</a> | 13.4 | 335   | 670 |
| WPE0390 | IPE1168 | <a href="#">FBM012-068</a> | <a href="#">PBCN10768</a> | 10.3 | 257.5 | 515 |
|         | IPE1169 | <a href="#">FBM012-069</a> | <a href="#">PBCN10769</a> | 6.6  | 165   | 330 |
|         | IPE1170 | <a href="#">FBM012-070</a> | <a href="#">PBCN10770</a> | 6.6  | 165   | 330 |
| WPE0391 | IPE1171 | <a href="#">FBM012-071</a> | <a href="#">PBCN10771</a> | 7.6  | 190   | 380 |
|         | IPE1172 | <a href="#">FBM012-072</a> | <a href="#">PBCN10772</a> | 4.5  | 112.5 | 225 |
|         | IPE1173 | <a href="#">FBM012-073</a> | <a href="#">PBCN10773</a> | 10.3 | 257.5 | 515 |
| WPE0392 | IPE1174 | <a href="#">FBM012-074</a> | <a href="#">PBCN10774</a> | 13.5 | 337.5 | 675 |
|         | IPE1175 | <a href="#">FBM012-075</a> | <a href="#">PBCN10775</a> | 13.2 | 330   | 660 |
|         | IPE1176 | <a href="#">FBM012-076</a> | <a href="#">PBCN10776</a> | 4.9  | 122.5 | 245 |
| WPE0393 | IPE1177 | <a href="#">FBM012-077</a> | <a href="#">PBCN10777</a> | 11.4 | 285   | 570 |
|         | IPE1178 | <a href="#">FBM012-078</a> | <a href="#">PBCN10778</a> | 14.1 | 352.5 | 705 |
|         | IPE1179 | <a href="#">FBM012-079</a> | <a href="#">PBCN10779</a> | 7.4  | 185   | 370 |
| WPE0394 | IPE1180 | <a href="#">FBM012-080</a> | <a href="#">PBCN10780</a> | 12.0 | 300   | 600 |
|         | IPE1181 | <a href="#">FBM012-081</a> | <a href="#">PBCN10781</a> | 9.5  | 237.5 | 475 |
|         | IPE1182 | <a href="#">FBM012-082</a> | <a href="#">PBCN10782</a> | 10.6 | 265   | 530 |
| WPE0395 | IPE1183 | <a href="#">FBM012-083</a> | <a href="#">PBCN10783</a> | 11.8 | 295   | 590 |
|         | IPE1184 | <a href="#">FBM012-084</a> | <a href="#">PBCN10784</a> | 7.9  | 197.5 | 395 |
|         | IPE1185 | <a href="#">FBM012-085</a> | <a href="#">PBCN10785</a> | 9.5  | 237.5 | 475 |
| WPE0396 | IPE1186 | <a href="#">FBM012-086</a> | <a href="#">PBCN10786</a> | 8.7  | 217.5 | 435 |
|         | IPE1187 | <a href="#">FBM012-087</a> | <a href="#">PBCN10787</a> | 7.7  | 192.5 | 385 |
|         | IPE1188 | <a href="#">FBM012-088</a> | <a href="#">PBCN10788</a> | 11.3 | 282.5 | 565 |
| WPE0397 | IPE1189 | <a href="#">FBM012-089</a> | <a href="#">PBCN10789</a> | 11.9 | 297.5 | 595 |
|         | IPE1190 | <a href="#">FBM012-090</a> | <a href="#">PBCN10790</a> | 6.9  | 172.5 | 345 |
|         | IPE1191 | <a href="#">FBM012-091</a> | <a href="#">PBCN10791</a> | 14.8 | 370   | 740 |
| WPE0398 | IPE1192 | <a href="#">FBM012-092</a> | <a href="#">PBCN10792</a> | 5.2  | 130   | 260 |
|         | IPE1193 | <a href="#">FBM012-093</a> | <a href="#">PBCN10793</a> | 16.1 | 402.5 | 805 |
|         | IPE1194 | <a href="#">FBM012-094</a> | <a href="#">PBCN10794</a> | 8.0  | 200   | 400 |
| WPE0399 | IPE1195 | <a href="#">FBM012-095</a> | <a href="#">PBCN10795</a> | 7.3  | 182.5 | 365 |
|         | IPE1196 | <a href="#">FBM012-096</a> | <a href="#">PBCN10796</a> | 10.3 | 257.5 | 515 |
|         | IPE1197 | <a href="#">FBM012-097</a> | <a href="#">PBCN10797</a> | 4.3  | 107.5 | 215 |
| WPE0400 | IPE1198 | <a href="#">FBM012-098</a> | <a href="#">PBCN10798</a> | 8.1  | 202.5 | 405 |
|         | IPE1199 | <a href="#">FBM012-099</a> | <a href="#">PBCN10799</a> | 12.5 | 312.5 | 625 |
|         | IPE1200 | <a href="#">FBM012-100</a> | <a href="#">PBCN10800</a> | 6.2  | 155   | 310 |
| WPE0401 | IPE1201 | <a href="#">FBM013-001</a> | <a href="#">PBCN10801</a> | 5.8  | 145   | 290 |
|         | IPE1202 | <a href="#">FBM013-002</a> | <a href="#">PBCN10802</a> | 7.7  | 192.5 | 385 |

|         |         |                            |                           |      |       |     |
|---------|---------|----------------------------|---------------------------|------|-------|-----|
|         | IPE1203 | <a href="#">FBM013-003</a> | <a href="#">PBCN10803</a> | 5.7  | 142.5 | 285 |
| WPE0402 | IPE1204 | <a href="#">FBM013-004</a> | <a href="#">PBCN10804</a> | 12.2 | 305   | 610 |
|         | IPE1205 | <a href="#">FBM013-005</a> | <a href="#">PBCN10805</a> | 5.2  | 130   | 260 |
|         | IPE1206 | <a href="#">FBM013-006</a> | <a href="#">PBCN10806</a> | 8.4  | 210   | 420 |
| WPE0403 | IPE1207 | <a href="#">FBM013-007</a> | <a href="#">PBCN10807</a> | 6.8  | 170   | 340 |
|         | IPE1208 | <a href="#">FBM013-008</a> | <a href="#">PBCN10808</a> | 11.2 | 280   | 560 |
|         | IPE1209 | <a href="#">FBM013-009</a> | <a href="#">PBCN10809</a> | 6.9  | 172.5 | 345 |
| WPE0404 | IPE1210 | <a href="#">FBM013-010</a> | <a href="#">PBCN10810</a> | 5.5  | 137.5 | 275 |
|         | IPE1211 | <a href="#">FBM013-011</a> | <a href="#">PBCN10811</a> | 9.3  | 232.5 | 465 |
|         | IPE1212 | <a href="#">FBM013-012</a> | <a href="#">PBCN10812</a> | 3.5  | 87.5  | 175 |
| WPE0405 | IPE1213 | <a href="#">FBM013-013</a> | <a href="#">PBCN10813</a> | 6.0  | 150   | 300 |
|         | IPE1214 | <a href="#">FBM013-014</a> | <a href="#">PBCN10814</a> | 5.0  | 125   | 250 |
|         | IPE1215 | <a href="#">FBM013-015</a> | <a href="#">PBCN10815</a> | 4.5  | 112.5 | 225 |
| WPE0406 | IPE1216 | <a href="#">FBM013-016</a> | <a href="#">PBCN10816</a> | 2.9  | 72.5  | 145 |
|         | IPE1217 | <a href="#">FBM013-017</a> | <a href="#">PBCN10817</a> | 4.8  | 120   | 240 |
|         | IPE1218 | <a href="#">FBM013-018</a> | <a href="#">PBCN10818</a> | 16.4 | 410   | 820 |
| WPE0407 | IPE1219 | <a href="#">FBM013-019</a> | <a href="#">PBCN10819</a> | 5.8  | 145   | 290 |
|         | IPE1220 | <a href="#">FBM013-020</a> | <a href="#">PBCN10820</a> | 8.8  | 220   | 440 |
|         | IPE1221 | <a href="#">FBM013-021</a> | <a href="#">PBCN10821</a> | 5.0  | 125   | 250 |
| WPE0408 | IPE1222 | <a href="#">FBM013-022</a> | <a href="#">PBCN10822</a> | 8.9  | 222.5 | 445 |
|         | IPE1223 | <a href="#">FBM013-023</a> | <a href="#">PBCN10823</a> | 12.6 | 315   | 630 |
|         | IPE1224 | <a href="#">FBM013-024</a> | <a href="#">PBCN10824</a> | 7.6  | 190   | 380 |
| WPE0409 | IPE1225 | <a href="#">FBM013-025</a> | <a href="#">PBCN10825</a> | 12.8 | 320   | 640 |
|         | IPE1226 | <a href="#">FBM013-026</a> | <a href="#">PBCN10826</a> | 5.4  | 135   | 270 |
|         | IPE1227 | <a href="#">FBM013-027</a> | <a href="#">PBCN10827</a> | 6.5  | 162.5 | 325 |
| WPE0410 | IPE1228 | <a href="#">FBM013-028</a> | <a href="#">PBCN10828</a> | 9.2  | 230   | 460 |
|         | IPE1229 | <a href="#">FBM013-029</a> | <a href="#">PBCN10829</a> | 12.8 | 320   | 640 |
|         | IPE1230 | <a href="#">FBM013-030</a> | <a href="#">PBCN10830</a> | 11.9 | 297.5 | 595 |
| WPE0411 | IPE1231 | <a href="#">FBM013-031</a> | <a href="#">PBCN10831</a> | 4.5  | 112.5 | 225 |
|         | IPE1232 | <a href="#">FBM013-032</a> | <a href="#">PBCN10832</a> | 6.3  | 157.5 | 315 |
|         | IPE1233 | <a href="#">FBM013-033</a> | <a href="#">PBCN10833</a> | 6.2  | 155   | 310 |
| WPE0412 | IPE1234 | <a href="#">FBM013-034</a> | <a href="#">PBCN10834</a> | 11.4 | 285   | 570 |
|         | IPE1235 | <a href="#">FBM013-035</a> | <a href="#">PBCN10835</a> | 8.0  | 200   | 400 |
|         | IPE1236 | <a href="#">FBM013-036</a> | <a href="#">PBCN10836</a> | 8.2  | 205   | 410 |
| WPE0413 | IPE1237 | <a href="#">FBM013-037</a> | <a href="#">PBCN10837</a> | 9.5  | 237.5 | 475 |
|         | IPE1238 | <a href="#">FBM013-038</a> | <a href="#">PBCN10838</a> | 7.0  | 175   | 350 |
|         | IPE1239 | <a href="#">FBM013-039</a> | <a href="#">PBCN10839</a> | 3.3  | 82.5  | 165 |
| WPE0414 | IPE1240 | <a href="#">FBM013-040</a> | <a href="#">PBCN10840</a> | 6.1  | 152.5 | 305 |
|         | IPE1241 | <a href="#">FBM013-041</a> | <a href="#">PBCN10841</a> | 6.8  | 170   | 340 |



|         |         |                            |                           |      |       |     |
|---------|---------|----------------------------|---------------------------|------|-------|-----|
|         | IPE1242 | <a href="#">FBM013-042</a> | <a href="#">PBCN10842</a> | 12.1 | 302.5 | 605 |
| WPE0415 | IPE1243 | <a href="#">FBM013-043</a> | <a href="#">PBCN10843</a> | 6.9  | 172.5 | 345 |
|         | IPE1244 | <a href="#">FBM013-044</a> | <a href="#">PBCN10844</a> | 11.8 | 295   | 590 |
|         | IPE1245 | <a href="#">FBM013-045</a> | <a href="#">PBCN10845</a> | 8.1  | 202.5 | 405 |
| WPE0416 | IPE1246 | <a href="#">FBM013-046</a> | <a href="#">PBCN10846</a> | 4.0  | 100   | 200 |
|         | IPE1247 | <a href="#">FBM013-047</a> | <a href="#">PBCN10847</a> | 4.2  | 105   | 210 |
|         | IPE1248 | <a href="#">FBM013-048</a> | <a href="#">PBCN10848</a> | 3.8  | 95    | 190 |
| WPE0417 | IPE1249 | <a href="#">FBM013-049</a> | <a href="#">PBCN10849</a> | 5.2  | 130   | 260 |
|         | IPE1250 | <a href="#">FBM013-050</a> | <a href="#">PBCN10850</a> | 7.9  | 197.5 | 395 |
|         | IPE1251 | <a href="#">FBM013-051</a> | <a href="#">PBCN10851</a> | 4.6  | 115   | 230 |
| WPE0418 | IPE1252 | <a href="#">FBM013-052</a> | <a href="#">PBCN10852</a> | 8.8  | 220   | 440 |
|         | IPE1253 | <a href="#">FBM013-053</a> | <a href="#">PBCN10853</a> | 8.5  | 212.5 | 425 |
|         | IPE1254 | <a href="#">FBM013-054</a> | <a href="#">PBCN10854</a> | 8.8  | 220   | 440 |
| WPE0419 | IPE1255 | <a href="#">FBM013-055</a> | <a href="#">PBCN10855</a> | 10.0 | 250   | 500 |
|         | IPE1256 | <a href="#">FBM013-056</a> | <a href="#">PBCN10856</a> | 8.4  | 210   | 420 |
|         | IPE1257 | <a href="#">FBM013-057</a> | <a href="#">PBCN10857</a> | 5.9  | 147.5 | 295 |
| WPE0420 | IPE1258 | <a href="#">FBM013-058</a> | <a href="#">PBCN10858</a> | 9.6  | 240   | 480 |
|         | IPE1259 | <a href="#">FBM013-059</a> | <a href="#">PBCN10859</a> | 5.2  | 130   | 260 |
|         | IPE1260 | <a href="#">FBM013-060</a> | <a href="#">PBCN10860</a> | 8.9  | 222.5 | 445 |
| WPE0421 | IPE1261 | <a href="#">FBM013-061</a> | <a href="#">PBCN10861</a> | 4.9  | 122.5 | 245 |
|         | IPE1262 | <a href="#">FBM013-062</a> | <a href="#">PBCN10862</a> | 10.9 | 272.5 | 545 |
|         | IPE1263 | <a href="#">FBM013-063</a> | <a href="#">PBCN10863</a> | 6.6  | 165   | 330 |
| WPE0422 | IPE1264 | <a href="#">FBM013-064</a> | <a href="#">PBCN10864</a> | 8.5  | 212.5 | 425 |
|         | IPE1265 | <a href="#">FBM013-065</a> | <a href="#">PBCN10865</a> | 11.1 | 277.5 | 555 |
|         | IPE1266 | <a href="#">FBM013-066</a> | <a href="#">PBCN10866</a> | 9.4  | 235   | 470 |
| WPE0423 | IPE1267 | <a href="#">FBM013-067</a> | <a href="#">PBCN10867</a> | 5.7  | 142.5 | 285 |
|         | IPE1268 | <a href="#">FBM013-068</a> | <a href="#">PBCN10868</a> | 10.0 | 250   | 500 |
|         | IPE1269 | <a href="#">FBM013-069</a> | <a href="#">PBCN10869</a> | 2.8  | 70    | 140 |
| WPE0424 | IPE1270 | <a href="#">FBM013-070</a> | <a href="#">PBCN10870</a> | 2.6  | 65    | 130 |
|         | IPE1271 | <a href="#">FBM013-071</a> | <a href="#">PBCN10871</a> | 8.5  | 212.5 | 425 |
|         | IPE1272 | <a href="#">FBM013-072</a> | <a href="#">PBCN10872</a> | 19.2 | 480   | 960 |
| WPE0425 | IPE1273 | <a href="#">FBM013-073</a> | <a href="#">PBCN10873</a> | 12.7 | 317.5 | 635 |
|         | IPE1274 | <a href="#">FBM013-074</a> | <a href="#">PBCN10874</a> | 4.6  | 115   | 230 |
|         | IPE1275 | <a href="#">FBM013-075</a> | <a href="#">PBCN10875</a> | 4.2  | 105   | 210 |
| WPE0426 | IPE1276 | <a href="#">FBM013-076</a> | <a href="#">PBCN10876</a> | 5.9  | 147.5 | 295 |
|         | IPE1277 | <a href="#">FBM013-077</a> | <a href="#">PBCN10877</a> | 10.5 | 262.5 | 525 |
|         | IPE1278 | <a href="#">FBM013-078</a> | <a href="#">PBCN10878</a> | 6.8  | 170   | 340 |
| WPE0427 | IPE1279 | <a href="#">FBM013-079</a> | <a href="#">PBCN10879</a> | 7.3  | 182.5 | 365 |
|         | IPE1280 | <a href="#">FBM013-080</a> | <a href="#">PBCN10880</a> | 8.3  | 207.5 | 415 |

|         |         |                            |                           |      |       |     |
|---------|---------|----------------------------|---------------------------|------|-------|-----|
|         | IPE1281 | <a href="#">FBM013-081</a> | <a href="#">PBCN10881</a> | 4.9  | 122.5 | 245 |
| WPE0428 | IPE1282 | <a href="#">FBM013-082</a> | <a href="#">PBCN10882</a> | 5.1  | 127.5 | 255 |
|         | IPE1283 | <a href="#">FBM013-083</a> | <a href="#">PBCN10883</a> | 13.5 | 337.5 | 675 |
|         | IPE1284 | <a href="#">FBM013-084</a> | <a href="#">PBCN10884</a> | 2.9  | 72.5  | 145 |
| WPE0429 | IPE1285 | <a href="#">FBM013-085</a> | <a href="#">PBCN10885</a> | 7.3  | 182.5 | 365 |
|         | IPE1286 | <a href="#">FBM013-086</a> | <a href="#">PBCN10886</a> | 12.1 | 302.5 | 605 |
|         | IPE1287 | <a href="#">FBM013-087</a> | <a href="#">PBCN10887</a> | 4.5  | 112.5 | 225 |
| WPE0430 | IPE1288 | <a href="#">FBM013-088</a> | <a href="#">PBCN10888</a> | 5.4  | 135   | 270 |
|         | IPE1289 | <a href="#">FBM013-089</a> | <a href="#">PBCN10889</a> | 5.2  | 130   | 260 |
|         | IPE1290 | <a href="#">FBM013-090</a> | <a href="#">PBCN10890</a> | 5.2  | 130   | 260 |
| WPE0431 | IPE1291 | <a href="#">FBM013-091</a> | <a href="#">PBCN10891</a> | 9.1  | 227.5 | 455 |
|         | IPE1292 | <a href="#">FBM013-092</a> | <a href="#">PBCN10892</a> | 4.6  | 115   | 230 |
|         | IPE1293 | <a href="#">FBM013-093</a> | <a href="#">PBCN10893</a> | 12.1 | 302.5 | 605 |
| WPE0432 | IPE1294 | <a href="#">FBM013-094</a> | <a href="#">PBCN10894</a> | 6.0  | 150   | 300 |
|         | IPE1295 | <a href="#">FBM013-095</a> | <a href="#">PBCN10895</a> | 7.0  | 175   | 350 |
|         | IPE1296 | <a href="#">FBM013-096</a> | <a href="#">PBCN10896</a> | 8.6  | 215   | 430 |
| WPE0433 | IPE1297 | <a href="#">FBM013-097</a> | <a href="#">PBCN10897</a> | 8.7  | 217.5 | 435 |
|         | IPE1298 | <a href="#">FBM013-098</a> | <a href="#">PBCN10898</a> | 11.3 | 282.5 | 565 |
|         | IPE1299 | <a href="#">FBM013-099</a> | <a href="#">PBCN10899</a> | 8.3  | 207.5 | 415 |
| WPE0434 | IPE1300 | <a href="#">FBM013-100</a> | <a href="#">PBCN10900</a> | 10.6 | 265   | 530 |
|         | IPE1301 | <a href="#">FBM014-001</a> | <a href="#">PBCN10901</a> | 7.2  | 180   | 360 |
|         | IPE1302 | <a href="#">FBM014-002</a> | <a href="#">PBCN10902</a> | 10.1 | 252.5 | 505 |
| WPE0435 | IPE1303 | <a href="#">FBM014-003</a> | <a href="#">PBCN10903</a> | 7.0  | 175   | 350 |
|         | IPE1304 | <a href="#">FBM014-004</a> | <a href="#">PBCN10904</a> | 10.6 | 265   | 530 |
|         | IPE1305 | <a href="#">FBM014-005</a> | <a href="#">PBCN10905</a> | 1.1  | 27.5  | 55  |
| WPE0436 | IPE1306 | <a href="#">FBM014-006</a> | <a href="#">PBCN10906</a> | 6.6  | 165   | 330 |
|         | IPE1307 | <a href="#">FBM014-007</a> | <a href="#">PBCN10907</a> | 14.8 | 370   | 740 |
|         | IPE1308 | <a href="#">FBM014-008</a> | <a href="#">PBCN10908</a> | 8.9  | 222.5 | 445 |
| WPE0437 | IPE1309 | <a href="#">FBM014-009</a> | <a href="#">PBCN10909</a> | 4.2  | 105   | 210 |
|         | IPE1310 | <a href="#">FBM014-010</a> | <a href="#">PBCN10910</a> | 7.5  | 187.5 | 375 |
|         | IPE1311 | <a href="#">FBM014-011</a> | <a href="#">PBCN10911</a> | 14.0 | 350   | 700 |
| WPE0438 | IPE1312 | <a href="#">FBM014-012</a> | <a href="#">PBCN10912</a> | 5.3  | 132.5 | 265 |
|         | IPE1313 | <a href="#">FBM014-013</a> | <a href="#">PBCN10913</a> | 5.1  | 127.5 | 255 |
|         | IPE1314 | <a href="#">FBM014-014</a> | <a href="#">PBCN10914</a> | 7.8  | 195   | 390 |
| WPE0439 | IPE1315 | <a href="#">FBM014-015</a> | <a href="#">PBCN10915</a> | 8.3  | 207.5 | 415 |
|         | IPE1316 | <a href="#">FBM014-016</a> | <a href="#">PBCN10916</a> | 3.2  | 80    | 160 |
|         | IPE1317 | <a href="#">FBM014-017</a> | <a href="#">PBCN10917</a> | 11.1 | 277.5 | 555 |
| WPE0440 | IPE1318 | <a href="#">FBM014-018</a> | <a href="#">PBCN10918</a> | 3.7  | 92.5  | 185 |
|         | IPE1319 | <a href="#">FBM014-019</a> | <a href="#">PBCN10919</a> | 7.0  | 175   | 350 |

|         |         |                            |                           |      |       |     |
|---------|---------|----------------------------|---------------------------|------|-------|-----|
|         | IPE1320 | <a href="#">FBM014-020</a> | <a href="#">PBCN10920</a> | 8.8  | 220   | 440 |
| WPE0441 | IPE1321 | <a href="#">FBM014-021</a> | <a href="#">PBCN10921</a> | 3.8  | 95    | 190 |
|         | IPE1322 | <a href="#">FBM014-022</a> | <a href="#">PBCN10922</a> | 10.7 | 267.5 | 535 |
|         | IPE1323 | <a href="#">FBM014-023</a> | <a href="#">PBCN10923</a> | 6.3  | 157.5 | 315 |
| WPE0442 | IPE1324 | <a href="#">FBM014-024</a> | <a href="#">PBCN10924</a> | 6.1  | 152.5 | 305 |
|         | IPE1325 | <a href="#">FBM014-025</a> | <a href="#">PBCN10925</a> | 5.4  | 135   | 270 |
|         | IPE1326 | <a href="#">FBM014-026</a> | <a href="#">PBCN10926</a> | 11.8 | 295   | 590 |
| WPE0443 | IPE1327 | <a href="#">FBM014-027</a> | <a href="#">PBCN10927</a> | 4.0  | 100   | 200 |
|         | IPE1328 | <a href="#">FBM014-028</a> | <a href="#">PBCN10928</a> | 4.4  | 110   | 220 |
|         | IPE1329 | <a href="#">FBM014-029</a> | <a href="#">PBCN10929</a> | 4.1  | 102.5 | 205 |
| WPE0444 | IPE1330 | <a href="#">FBM014-030</a> | <a href="#">PBCN10930</a> | 7.9  | 197.5 | 395 |
|         | IPE1331 | <a href="#">FBM014-031</a> | <a href="#">PBCN10931</a> | 16.7 | 417.5 | 835 |
|         | IPE1332 | <a href="#">FBM014-032</a> | <a href="#">PBCN10932</a> | 8.9  | 222.5 | 445 |
| WPE0445 | IPE1333 | <a href="#">FBM014-033</a> | <a href="#">PBCN10933</a> | 9.6  | 240   | 480 |
|         | IPE1334 | <a href="#">FBM014-034</a> | <a href="#">PBCN10934</a> | 7.6  | 190   | 380 |
|         | IPE1335 | <a href="#">FBM014-035</a> | <a href="#">PBCN10935</a> | 5.3  | 132.5 | 265 |
| WPE0446 | IPE1336 | <a href="#">FBM014-036</a> | <a href="#">PBCN10936</a> | 9.0  | 225   | 450 |
|         | IPE1337 | <a href="#">FBM014-037</a> | <a href="#">PBCN10937</a> | 7.1  | 177.5 | 355 |
|         | IPE1338 | <a href="#">FBM014-038</a> | <a href="#">PBCN10938</a> | 5.1  | 127.5 | 255 |
| WPE0447 | IPE1339 | <a href="#">FBM014-039</a> | <a href="#">PBCN10939</a> | 11.4 | 285   | 570 |
|         | IPE1340 | <a href="#">FBM014-040</a> | <a href="#">PBCN10940</a> | 4.8  | 120   | 240 |
|         | IPE1341 | <a href="#">FBM014-041</a> | <a href="#">PBCN10941</a> | 11.9 | 297.5 | 595 |
| WPE0448 | IPE1342 | <a href="#">FBM014-042</a> | <a href="#">PBCN10942</a> | 7.0  | 175   | 350 |
|         | IPE1343 | <a href="#">FBM014-043</a> | <a href="#">PBCN10943</a> | 8.6  | 215   | 430 |
|         | IPE1344 | <a href="#">FBM014-044</a> | <a href="#">PBCN10944</a> | 4.0  | 100   | 200 |
| WPE0449 | IPE1345 | <a href="#">FBM014-045</a> | <a href="#">PBCN10945</a> | 8.1  | 202.5 | 405 |
|         | IPE1346 | <a href="#">FBM014-046</a> | <a href="#">PBCN10946</a> | 6.2  | 155   | 310 |
|         | IPE1347 | <a href="#">FBM014-047</a> | <a href="#">PBCN10947</a> | 5.2  | 130   | 260 |
| WPE0450 | IPE1348 | <a href="#">FBM014-048</a> | <a href="#">PBCN10948</a> | 11.0 | 275   | 550 |
|         | IPE1349 | <a href="#">FBM014-049</a> | <a href="#">PBCN10949</a> | 4.9  | 122.5 | 245 |
|         | IPE1350 | <a href="#">FBM014-050</a> | <a href="#">PBCN10950</a> | 4.2  | 105   | 210 |
| WPE0451 | IPE1351 | <a href="#">FBM014-051</a> | <a href="#">PBCN10951</a> | 14.5 | 362.5 | 725 |
|         | IPE1352 | <a href="#">FBM014-052</a> | <a href="#">PBCN10952</a> | 4.3  | 107.5 | 215 |
|         | IPE1353 | <a href="#">FBM014-053</a> | <a href="#">PBCN10953</a> | 4.1  | 102.5 | 205 |
| WPE0452 | IPE1354 | <a href="#">FBM014-054</a> | <a href="#">PBCN10954</a> | 5.1  | 127.5 | 255 |
|         | IPE1355 | <a href="#">FBM014-055</a> | <a href="#">PBCN10955</a> | 10.0 | 250   | 500 |
|         | IPE1356 | <a href="#">FBM014-056</a> | <a href="#">PBCN10956</a> | 5.4  | 135   | 270 |
| WPE0453 | IPE1357 | <a href="#">FBM014-057</a> | <a href="#">PBCN10957</a> | 6.4  | 160   | 320 |
|         | IPE1358 | <a href="#">FBM014-058</a> | <a href="#">PBCN10958</a> | 6.5  | 162.5 | 325 |

|         |         |                            |                           |      |       |     |
|---------|---------|----------------------------|---------------------------|------|-------|-----|
|         | IPE1359 | <a href="#">FBM014-059</a> | <a href="#">PBCN10959</a> | 8.2  | 205   | 410 |
| WPE0454 | IPE1360 | <a href="#">FBM014-060</a> | <a href="#">PBCN10960</a> | 11.8 | 295   | 590 |
|         | IPE1361 | <a href="#">FBM014-061</a> | <a href="#">PBCN10961</a> | 4.2  | 105   | 210 |
|         | IPE1362 | <a href="#">FBM014-062</a> | <a href="#">PBCN10962</a> | 9.5  | 237.5 | 475 |
| WPE0455 | IPE1363 | <a href="#">FBM014-063</a> | <a href="#">PBCN10963</a> | 8.6  | 215   | 430 |
|         | IPE1364 | <a href="#">FBM014-064</a> | <a href="#">PBCN10964</a> | 5.9  | 147.5 | 295 |
|         | IPE1365 | <a href="#">FBM014-065</a> | <a href="#">PBCN10965</a> | 7.2  | 180   | 360 |
| WPE0456 | IPE1366 | <a href="#">FBM014-066</a> | <a href="#">PBCN10966</a> | 4.0  | 100   | 200 |
|         | IPE1367 | <a href="#">FBM014-067</a> | <a href="#">PBCN10967</a> | 5.4  | 135   | 270 |
|         | IPE1368 | <a href="#">FBM014-068</a> | <a href="#">PBCN10968</a> | 2.3  | 57.5  | 115 |
| WPE0457 | IPE1369 | <a href="#">FBM014-069</a> | <a href="#">PBCN10969</a> | 5.3  | 132.5 | 265 |
|         | IPE1370 | <a href="#">FBM014-070</a> | <a href="#">PBCN10970</a> | 8.8  | 220   | 440 |
|         | IPE1371 | <a href="#">FBM014-071</a> | <a href="#">PBCN10971</a> | 8.0  | 200   | 400 |
| WPE0458 | IPE1372 | <a href="#">FBM014-072</a> | <a href="#">PBCN10972</a> | 7.6  | 190   | 380 |
|         | IPE1373 | <a href="#">FBM014-073</a> | <a href="#">PBCN10973</a> | 8.7  | 217.5 | 435 |
|         | IPE1374 | <a href="#">FBM014-074</a> | <a href="#">PBCN10974</a> | 4.3  | 107.5 | 215 |
| WPE0459 | IPE1375 | <a href="#">FBM014-075</a> | <a href="#">PBCN10975</a> | 8.2  | 205   | 410 |
|         | IPE1376 | <a href="#">FBM014-076</a> | <a href="#">PBCN10976</a> | 5.5  | 137.5 | 275 |
|         | IPE1377 | <a href="#">FBM014-077</a> | <a href="#">PBCN10977</a> | 15.8 | 395   | 790 |
| WPE0460 | IPE1378 | <a href="#">FBM014-078</a> | <a href="#">PBCN10978</a> | 6.4  | 160   | 320 |
|         | IPE1379 | <a href="#">FBM014-079</a> | <a href="#">PBCN10979</a> | 6.4  | 160   | 320 |
|         | IPE1380 | <a href="#">FBM014-080</a> | <a href="#">PBCN10980</a> | 3.8  | 95    | 190 |
| WPE0461 | IPE1381 | <a href="#">FBM014-081</a> | <a href="#">PBCN10981</a> | 4.8  | 120   | 240 |
|         | IPE1382 | <a href="#">FBM014-082</a> | <a href="#">PBCN10982</a> | 5.5  | 137.5 | 275 |
|         | IPE1383 | <a href="#">FBM014-083</a> | <a href="#">PBCN10983</a> | 3.2  | 80    | 160 |
| WPE0462 | IPE1384 | <a href="#">FBM014-084</a> | <a href="#">PBCN10984</a> | 5.3  | 132.5 | 265 |
|         | IPE1385 | <a href="#">FBM014-085</a> | <a href="#">PBCN10985</a> | 9.6  | 240   | 480 |
|         | IPE1386 | <a href="#">FBM014-086</a> | <a href="#">PBCN10986</a> | 9.4  | 235   | 470 |
| WPE0463 | IPE1387 | <a href="#">FBM014-087</a> | <a href="#">PBCN10987</a> | 7.8  | 195   | 390 |
|         | IPE1388 | <a href="#">FBM014-088</a> | <a href="#">PBCN10988</a> | 8.1  | 202.5 | 405 |
|         | IPE1389 | <a href="#">FBM014-089</a> | <a href="#">PBCN10989</a> | 3.4  | 85    | 170 |
| WPE0464 | IPE1390 | <a href="#">FBM014-090</a> | <a href="#">PBCN10990</a> | 10.1 | 252.5 | 505 |
|         | IPE1391 | <a href="#">FBM014-091</a> | <a href="#">PBCN10991</a> | 7.6  | 190   | 380 |
|         | IPE1392 | <a href="#">FBM014-092</a> | <a href="#">PBCN10992</a> | 5.9  | 147.5 | 295 |
| WPE0465 | IPE1393 | <a href="#">FBM014-093</a> | <a href="#">PBCN10993</a> | 6.4  | 160   | 320 |
|         | IPE1394 | <a href="#">FBM014-094</a> | <a href="#">PBCN10994</a> | 13.0 | 325   | 650 |
|         | IPE1395 | <a href="#">FBM014-095</a> | <a href="#">PBCN10995</a> | 5.1  | 127.5 | 255 |
| WPE0466 | IPE1396 | <a href="#">FBM014-096</a> | <a href="#">PBCN10996</a> | 10.1 | 252.5 | 505 |
|         | IPE1397 | <a href="#">FBM014-097</a> | <a href="#">PBCN10997</a> | 8.1  | 202.5 | 405 |

|         |         |                            |                           |      |       |     |
|---------|---------|----------------------------|---------------------------|------|-------|-----|
|         | IPE1398 | <a href="#">FBM014-098</a> | <a href="#">PBCN10998</a> | 9.3  | 232.5 | 465 |
| WPE0467 | IPE1399 | <a href="#">FBM014-099</a> | <a href="#">PBCN10999</a> | 6.6  | 165   | 330 |
|         | IPE1400 | <a href="#">FBM014-100</a> | <a href="#">PBCN11000</a> | 3.9  | 97.5  | 195 |
|         | IPE1401 | <a href="#">FBM015-001</a> | <a href="#">PBNP10101</a> | 13.2 | 330   | 660 |
| WPE0468 | IPE1402 | <a href="#">FBM015-002</a> | <a href="#">PBNP10102</a> | 2.0  | 50    | 100 |
|         | IPE1403 | <a href="#">FBM015-003</a> | <a href="#">PBNP10103</a> | 4.0  | 100   | 200 |
|         | IPE1404 | <a href="#">FBM015-004</a> | <a href="#">PBNP10104</a> | 6.1  | 152.5 | 305 |
| WPE0469 | IPE1405 | <a href="#">FBM015-005</a> | <a href="#">PBNP10105</a> | 5.1  | 127.5 | 255 |
|         | IPE1406 | <a href="#">FBM015-006</a> | <a href="#">PBNP10106</a> | 5.2  | 130   | 260 |
|         | IPE1407 | <a href="#">FBM015-007</a> | <a href="#">PBNP10107</a> | 10.6 | 265   | 530 |
| WPE0470 | IPE1408 | <a href="#">FBM015-008</a> | <a href="#">PBNP10108</a> | 9.0  | 225   | 450 |
|         | IPE1409 | <a href="#">FBM015-009</a> | <a href="#">PBNP10109</a> | 2.9  | 72.5  | 145 |
|         | IPE1410 | <a href="#">FBM015-010</a> | <a href="#">PBNP10110</a> | 5.6  | 140   | 280 |
| WPE0471 | IPE1411 | <a href="#">FBM015-011</a> | <a href="#">PBNP10111</a> | 5.0  | 125   | 250 |
|         | IPE1412 | <a href="#">FBM015-012</a> | <a href="#">PBNP10112</a> | 14.0 | 350   | 700 |
|         | IPE1413 | <a href="#">FBM015-013</a> | <a href="#">PBNP10113</a> | 10.6 | 265   | 530 |
| WPE0472 | IPE1414 | <a href="#">FBM015-014</a> | <a href="#">PBNP10114</a> | 6.6  | 165   | 330 |
|         | IPE1415 | <a href="#">FBM015-015</a> | <a href="#">PBNP10115</a> | 4.0  | 100   | 200 |
|         | IPE1416 | <a href="#">FBM015-016</a> | <a href="#">PBNP10116</a> | 4.6  | 115   | 230 |
| WPE0473 | IPE1417 | <a href="#">FBM015-017</a> | <a href="#">PBNP10117</a> | 4.8  | 120   | 240 |
|         | IPE1418 | <a href="#">FBM015-018</a> | <a href="#">PBNP10118</a> | 10.3 | 257.5 | 515 |
|         | IPE1419 | <a href="#">FBM015-019</a> | <a href="#">PBNP10119</a> | 3.4  | 85    | 170 |
| WPE0474 | IPE1420 | <a href="#">FBM015-020</a> | <a href="#">PBNP10120</a> | 15.1 | 377.5 | 755 |
|         | IPE1421 | <a href="#">FBM015-021</a> | <a href="#">PBNP10121</a> | 10.0 | 250   | 500 |
|         | IPE1422 | <a href="#">FBM015-022</a> | <a href="#">PBNP10122</a> | 8.2  | 205   | 410 |
| WPE0475 | IPE1423 | <a href="#">FBM015-023</a> | <a href="#">PBNP10123</a> | 14.8 | 370   | 740 |
|         | IPE1424 | <a href="#">FBM015-024</a> | <a href="#">PBNP10124</a> | 5.9  | 147.5 | 295 |
|         | IPE1425 | <a href="#">FBM015-025</a> | <a href="#">PBNP10125</a> | 6.0  | 150   | 300 |
| WPE0476 | IPE1426 | <a href="#">FBM015-026</a> | <a href="#">PBNP10126</a> | 6.0  | 150   | 300 |
|         | IPE1427 | <a href="#">FBM015-027</a> | <a href="#">PBNP10127</a> | 5.3  | 132.5 | 265 |
|         | IPE1428 | <a href="#">FBM015-028</a> | <a href="#">PBNP10128</a> | 5.0  | 125   | 250 |
| WPE0477 | IPE1429 | <a href="#">FBM015-029</a> | <a href="#">PBNP10129</a> | 5.7  | 142.5 | 285 |
|         | IPE1430 | <a href="#">FBM015-030</a> | <a href="#">PBNP10130</a> | 7.4  | 185   | 370 |
|         | IPE1431 | <a href="#">FBM015-031</a> | <a href="#">PBNP10131</a> | 6.8  | 170   | 340 |
| WPE0478 | IPE1432 | <a href="#">FBM015-032</a> | <a href="#">PBNP10132</a> | 6.6  | 165   | 330 |
|         | IPE1433 | <a href="#">FBM015-033</a> | <a href="#">PBNP10133</a> | 5.8  | 145   | 290 |
|         | IPE1434 | <a href="#">FBM015-034</a> | <a href="#">PBNP10134</a> | 4.9  | 122.5 | 245 |
| WPE0479 | IPE1435 | <a href="#">FBM015-035</a> | <a href="#">PBNP10135</a> | 3.4  | 85    | 170 |
|         | IPE1436 | <a href="#">FBM015-036</a> | <a href="#">PBNP10136</a> | 7.4  | 185   | 370 |

|         |         |                            |                           |      |       |     |
|---------|---------|----------------------------|---------------------------|------|-------|-----|
|         | IPE1437 | <a href="#">FBM015-037</a> | <a href="#">PBNP10137</a> | 6.2  | 155   | 310 |
| WPE0480 | IPE1438 | <a href="#">FBM015-038</a> | <a href="#">PBNP10138</a> | 11.5 | 287.5 | 575 |
|         | IPE1439 | <a href="#">FBM015-039</a> | <a href="#">PBNP10139</a> | 2.5  | 62.5  | 125 |
|         | IPE1440 | <a href="#">FBM015-040</a> | <a href="#">PBNP10140</a> | 6.7  | 167.5 | 335 |
| WPE0481 | IPE1441 | <a href="#">FBM015-041</a> | <a href="#">PBNP10141</a> | 2.7  | 67.5  | 135 |
|         | IPE1442 | <a href="#">FBM015-042</a> | <a href="#">PBNP10142</a> | 2.7  | 67.5  | 135 |
|         | IPE1443 | <a href="#">FBM015-043</a> | <a href="#">PBNP10143</a> | 6.6  | 165   | 330 |
| WPE0482 | IPE1444 | <a href="#">FBM015-044</a> | <a href="#">PBNP10144</a> | 8.4  | 210   | 420 |
|         | IPE1445 | <a href="#">FBM015-045</a> | <a href="#">PBNP10145</a> | 3.9  | 97.5  | 195 |
|         | IPE1446 | <a href="#">FBM015-046</a> | <a href="#">PBNP10146</a> | 6.5  | 162.5 | 325 |
| WPE0483 | IPE1447 | <a href="#">FBM015-047</a> | <a href="#">PBNP10147</a> | 5.4  | 135   | 270 |
|         | IPE1448 | <a href="#">FBM015-048</a> | <a href="#">PBNP10148</a> | 4.1  | 102.5 | 205 |
|         | IPE1449 | <a href="#">FBM015-049</a> | <a href="#">PBNP10149</a> | 9.8  | 245   | 490 |
| WPE0484 | IPE1450 | <a href="#">FBM015-050</a> | <a href="#">PBNP10150</a> | 5.9  | 147.5 | 295 |
|         | IPE1451 | <a href="#">FBM015-051</a> | <a href="#">PBNP10151</a> | 7.2  | 180   | 360 |
|         | IPE1452 | <a href="#">FBM015-052</a> | <a href="#">PBNP10152</a> | 7.3  | 182.5 | 365 |
| WPE0485 | IPE1453 | <a href="#">FBM015-053</a> | <a href="#">PBNP10153</a> | 6.2  | 155   | 310 |
|         | IPE1454 | <a href="#">FBM015-054</a> | <a href="#">PBNP10154</a> | 12.3 | 307.5 | 615 |
|         | IPE1455 | <a href="#">FBM015-055</a> | <a href="#">PBNP10155</a> | 8.4  | 210   | 420 |
| WPE0486 | IPE1456 | <a href="#">FBM015-056</a> | <a href="#">PBNP10156</a> | 4.2  | 105   | 210 |
|         | IPE1457 | <a href="#">FBM015-057</a> | <a href="#">PBNP10157</a> | 3.8  | 95    | 190 |
|         | IPE1458 | <a href="#">FBM015-058</a> | <a href="#">PBNP10158</a> | 2.4  | 60    | 120 |
| WPE0487 | IPE1459 | <a href="#">FBM015-059</a> | <a href="#">PBNP10159</a> | 4.0  | 100   | 200 |
|         | IPE1460 | <a href="#">FBM015-060</a> | <a href="#">PBNP10160</a> | 5.7  | 142.5 | 285 |
|         | IPE1461 | <a href="#">FBM015-061</a> | <a href="#">PBNP10161</a> | 12.3 | 307.5 | 615 |
| WPE0488 | IPE1462 | <a href="#">FBM015-062</a> | <a href="#">PBNP10162</a> | 11.9 | 297.5 | 595 |
|         | IPE1463 | <a href="#">FBM015-063</a> | <a href="#">PBNP10163</a> | 10.5 | 262.5 | 525 |
|         | IPE1464 | <a href="#">FBM015-064</a> | <a href="#">PBNP10164</a> | 5.5  | 137.5 | 275 |
| WPE0489 | IPE1465 | <a href="#">FBM015-065</a> | <a href="#">PBNP10165</a> | 5.4  | 135   | 270 |
|         | IPE1466 | <a href="#">FBM015-066</a> | <a href="#">PBNP10166</a> | 5.8  | 145   | 290 |
|         | IPE1467 | <a href="#">FBM015-067</a> | <a href="#">PBNP10167</a> | 5.3  | 132.5 | 265 |
| WPE0490 | IPE1468 | <a href="#">FBM015-068</a> | <a href="#">PBNP10168</a> | 19.0 | 475   | 950 |
|         | IPE1469 | <a href="#">FBM015-069</a> | <a href="#">PBNP10169</a> | 3.9  | 97.5  | 195 |
|         | IPE1470 | <a href="#">FBM015-070</a> | <a href="#">PBNP10170</a> | 8.0  | 200   | 400 |
| WPE0491 | IPE1471 | <a href="#">FBM015-071</a> | <a href="#">PBNP10171</a> | 4.4  | 110   | 220 |
|         | IPE1472 | <a href="#">FBM015-072</a> | <a href="#">PBNP10172</a> | 8.5  | 212.5 | 425 |
|         | IPE1473 | <a href="#">FBM015-073</a> | <a href="#">PBNP10173</a> | 9.9  | 247.5 | 495 |
| WPE0492 | IPE1474 | <a href="#">FBM015-074</a> | <a href="#">PBNP10174</a> | 6.5  | 162.5 | 325 |
|         | IPE1475 | <a href="#">FBM015-075</a> | <a href="#">PBNP10175</a> | 9.6  | 240   | 480 |

|         |         |                            |                           |      |       |     |
|---------|---------|----------------------------|---------------------------|------|-------|-----|
|         | IPE1476 | <a href="#">FBM015-076</a> | <a href="#">PBNP10176</a> | 4.1  | 102.5 | 205 |
| WPE0493 | IPE1477 | <a href="#">FBM015-077</a> | <a href="#">PBNP10177</a> | 8.3  | 207.5 | 415 |
|         | IPE1478 | <a href="#">FBM015-078</a> | <a href="#">PBNP10178</a> | 13.0 | 325   | 650 |
|         | IPE1479 | <a href="#">FBM015-079</a> | <a href="#">PBNP10179</a> | 5.2  | 130   | 260 |
| WPE0494 | IPE1480 | <a href="#">FBM015-080</a> | <a href="#">PBNP10180</a> | 3.6  | 90    | 180 |
|         | IPE1481 | <a href="#">FBM015-081</a> | <a href="#">PBNP10181</a> | 7.2  | 180   | 360 |
|         | IPE1482 | <a href="#">FBM015-082</a> | <a href="#">PBNP10182</a> | 6.5  | 162.5 | 325 |
| WPE0495 | IPE1483 | <a href="#">FBM015-083</a> | <a href="#">PBNP10183</a> | 12.9 | 322.5 | 645 |
|         | IPE1484 | <a href="#">FBM015-084</a> | <a href="#">PBNP10184</a> | 7.0  | 175   | 350 |
|         | IPE1485 | <a href="#">FBM015-085</a> | <a href="#">PBNP10185</a> | 11.3 | 282.5 | 565 |
| WPE0496 | IPE1486 | <a href="#">FBM015-086</a> | <a href="#">PBNP10186</a> | 7.2  | 180   | 360 |
|         | IPE1487 | <a href="#">FBM015-087</a> | <a href="#">PBNP10187</a> | 13.1 | 327.5 | 655 |
|         | IPE1488 | <a href="#">FBM015-088</a> | <a href="#">PBNP10188</a> | 10.6 | 265   | 530 |
| WPE0497 | IPE1489 | <a href="#">FBM015-089</a> | <a href="#">PBNP10189</a> | 9.2  | 230   | 460 |
|         | IPE1490 | <a href="#">FBM015-090</a> | <a href="#">PBNP10190</a> | 8.6  | 215   | 430 |
|         | IPE1491 | <a href="#">FBM015-091</a> | <a href="#">PBNP10191</a> | 2.7  | 67.5  | 135 |
| WPE0498 | IPE1492 | <a href="#">FBM015-092</a> | <a href="#">PBNP10192</a> | 7.2  | 180   | 360 |
|         | IPE1493 | <a href="#">FBM015-093</a> | <a href="#">PBNP10193</a> | 5.3  | 132.5 | 265 |
|         | IPE1494 | <a href="#">FBM015-094</a> | <a href="#">PBNP10194</a> | 8.0  | 200   | 400 |
| WPE0499 | IPE1495 | <a href="#">FBM015-095</a> | <a href="#">PBNP10195</a> | 1.2  | 30    | 60  |
|         | IPE1496 | <a href="#">FBM015-096</a> | <a href="#">PBNP10196</a> | 7.3  | 182.5 | 365 |
|         | IPE1497 | <a href="#">FBM015-097</a> | <a href="#">PBNP10197</a> | 4.9  | 122.5 | 245 |
| WPE0500 | IPE1498 | <a href="#">FBM015-098</a> | <a href="#">PBNP10198</a> | 7.5  | 187.5 | 375 |
|         | IPE1499 | <a href="#">FBM015-099</a> | <a href="#">PBNP10199</a> | 8.3  | 207.5 | 415 |
|         | IPE1500 | <a href="#">FBM015-100</a> | <a href="#">PBNP10200</a> | 6.8  | 170   | 340 |
| WPE0501 | IPE1501 | <a href="#">FBM016-001</a> | <a href="#">PBCN11001</a> | 5.8  | 145   | 290 |
|         | IPE1502 | <a href="#">FBM016-002</a> | <a href="#">PBCN11002</a> | 6.3  | 157.5 | 315 |
|         | IPE1503 | <a href="#">FBM016-003</a> | <a href="#">PBCN11003</a> | 6.0  | 150   | 300 |
| WPE0502 | IPE1504 | <a href="#">FBM016-004</a> | <a href="#">PBCN11004</a> | 5.6  | 140   | 280 |
|         | IPE1505 | <a href="#">FBM016-005</a> | <a href="#">PBCN11005</a> | 3.8  | 95    | 190 |
|         | IPE1506 | <a href="#">FBM016-006</a> | <a href="#">PBCN11006</a> | 10.9 | 272.5 | 545 |
| WPE0503 | IPE1507 | <a href="#">FBM016-007</a> | <a href="#">PBCN11007</a> | 5.3  | 132.5 | 265 |
|         | IPE1508 | <a href="#">FBM016-008</a> | <a href="#">PBCN11008</a> | 6.2  | 155   | 310 |
|         | IPE1509 | <a href="#">FBM016-009</a> | <a href="#">PBCN11009</a> | 7.3  | 182.5 | 365 |
| WPE0504 | IPE1510 | <a href="#">FBM016-010</a> | <a href="#">PBCN11010</a> | 4.0  | 100   | 200 |
|         | IPE1511 | <a href="#">FBM016-011</a> | <a href="#">PBCN11011</a> | 11.1 | 277.5 | 555 |
|         | IPE1512 | <a href="#">FBM016-012</a> | <a href="#">PBCN11012</a> | 3.4  | 85    | 170 |
| WPE0505 | IPE1513 | <a href="#">FBM016-013</a> | <a href="#">PBCN11013</a> | 4.6  | 115   | 230 |
|         | IPE1514 | <a href="#">FBM016-014</a> | <a href="#">PBCN11014</a> | 11.5 | 287.5 | 575 |

|         |         |                            |                           |      |       |     |
|---------|---------|----------------------------|---------------------------|------|-------|-----|
|         | IPE1515 | <a href="#">FBM016-015</a> | <a href="#">PBCN11015</a> | 4.6  | 115   | 230 |
| WPE0506 | IPE1516 | <a href="#">FBM016-016</a> | <a href="#">PBCN11016</a> | 6.3  | 157.5 | 315 |
|         | IPE1517 | <a href="#">FBM016-017</a> | <a href="#">PBCN11017</a> | 10.2 | 255   | 510 |
|         | IPE1518 | <a href="#">FBM016-018</a> | <a href="#">PBCN11018</a> | 4.8  | 120   | 240 |
| WPE0507 | IPE1519 | <a href="#">FBM016-019</a> | <a href="#">PBCN11019</a> | 8.5  | 212.5 | 425 |
|         | IPE1520 | <a href="#">FBM016-020</a> | <a href="#">PBCN11020</a> | 6.1  | 152.5 | 305 |
|         | IPE1521 | <a href="#">FBM016-021</a> | <a href="#">PBCN11021</a> | 4.2  | 105   | 210 |
| WPE0508 | IPE1522 | <a href="#">FBM016-022</a> | <a href="#">PBCN11022</a> | 3.1  | 77.5  | 155 |
|         | IPE1523 | <a href="#">FBM016-023</a> | <a href="#">PBCN11023</a> | 5.0  | 125   | 250 |
|         | IPE1524 | <a href="#">FBM016-024</a> | <a href="#">PBCN11024</a> | 7.9  | 197.5 | 395 |
| WPE0509 | IPE1525 | <a href="#">FBM016-025</a> | <a href="#">PBCN11025</a> | 1.7  | 42.5  | 85  |
|         | IPE1526 | <a href="#">FBM016-026</a> | <a href="#">PBCN11026</a> | 5.9  | 147.5 | 295 |
|         | IPE1527 | <a href="#">FBM016-027</a> | <a href="#">PBCN11027</a> | 4.1  | 102.5 | 205 |
| WPE0510 | IPE1528 | <a href="#">FBM016-028</a> | <a href="#">PBCN11028</a> | 14.1 | 352.5 | 705 |
|         | IPE1529 | <a href="#">FBM016-029</a> | <a href="#">PBCN11029</a> | 6.0  | 150   | 300 |
|         | IPE1530 | <a href="#">FBM016-030</a> | <a href="#">PBCN11030</a> | 11.9 | 297.5 | 595 |
| WPE0511 | IPE1531 | <a href="#">FBM016-031</a> | <a href="#">PBCN11031</a> | 10.1 | 252.5 | 505 |
|         | IPE1532 | <a href="#">FBM016-032</a> | <a href="#">PBCN11032</a> | 4.0  | 100   | 200 |
|         | IPE1533 | <a href="#">FBM016-033</a> | <a href="#">PBCN11033</a> | 3.4  | 85    | 170 |
| WPE0512 | IPE1534 | <a href="#">FBM016-034</a> | <a href="#">PBCN11034</a> | 4.9  | 122.5 | 245 |
|         | IPE1535 | <a href="#">FBM016-035</a> | <a href="#">PBCN11035</a> | 9.9  | 247.5 | 495 |
|         | IPE1536 | <a href="#">FBM016-036</a> | <a href="#">PBCN11036</a> | 4.7  | 117.5 | 235 |
| WPE0513 | IPE1537 | <a href="#">FBM016-037</a> | <a href="#">PBCN11037</a> | 10.1 | 252.5 | 505 |
|         | IPE1538 | <a href="#">FBM016-038</a> | <a href="#">PBCN11038</a> | 10.9 | 272.5 | 545 |
|         | IPE1539 | <a href="#">FBM016-039</a> | <a href="#">PBCN11039</a> | 9.4  | 235   | 470 |
| WPE0514 | IPE1540 | <a href="#">FBM016-040</a> | <a href="#">PBCN11040</a> | 7.0  | 175   | 350 |
|         | IPE1541 | <a href="#">FBM016-041</a> | <a href="#">PBCN11041</a> | 4.6  | 115   | 230 |
|         | IPE1542 | <a href="#">FBM016-042</a> | <a href="#">PBCN11042</a> | 5.1  | 127.5 | 255 |
| WPE0515 | IPE1543 | <a href="#">FBM016-043</a> | <a href="#">PBCN11043</a> | 14.9 | 372.5 | 745 |
|         | IPE1544 | <a href="#">FBM016-044</a> | <a href="#">PBCN11044</a> | 5.9  | 147.5 | 295 |
|         | IPE1545 | <a href="#">FBM016-045</a> | <a href="#">PBCN11045</a> | 12.6 | 315   | 630 |
| WPE0516 | IPE1546 | <a href="#">FBM016-046</a> | <a href="#">PBCN11046</a> | 4.7  | 117.5 | 235 |
|         | IPE1547 | <a href="#">FBM016-047</a> | <a href="#">PBCN11047</a> | 4.8  | 120   | 240 |
|         | IPE1548 | <a href="#">FBM016-048</a> | <a href="#">PBCN11048</a> | 2.9  | 72.5  | 145 |
| WPE0517 | IPE1549 | <a href="#">FBM016-049</a> | <a href="#">PBCN11049</a> | 8.4  | 210   | 420 |
|         | IPE1550 | <a href="#">FBM016-050</a> | <a href="#">PBCN11050</a> | 5.8  | 145   | 290 |
|         | IPE1551 | <a href="#">FBM016-051</a> | <a href="#">PBCN11051</a> | 6.2  | 155   | 310 |
| WPE0518 | IPE1552 | <a href="#">FBM016-052</a> | <a href="#">PBCN11052</a> | 10.6 | 265   | 530 |
|         | IPE1553 | <a href="#">FBM016-053</a> | <a href="#">PBCN11053</a> | 7.2  | 180   | 360 |
|         | IPE1554 | <a href="#">FBM016-054</a> | <a href="#">PBCN11054</a> | 4.9  | 122.5 | 245 |



|         |         |                            |                           |      |       |     |
|---------|---------|----------------------------|---------------------------|------|-------|-----|
| WPE0519 | IPE1555 | <a href="#">FBM016-055</a> | <a href="#">PBCN11055</a> | 7.4  | 185   | 370 |
|         | IPE1556 | <a href="#">FBM016-056</a> | <a href="#">PBCN11056</a> | 5.5  | 137.5 | 275 |
|         | IPE1557 | <a href="#">FBM016-057</a> | <a href="#">PBCN11057</a> | 5.3  | 132.5 | 265 |
| WPE0520 | IPE1558 | <a href="#">FBM016-058</a> | <a href="#">PBCN11058</a> | 8.6  | 215   | 430 |
|         | IPE1559 | <a href="#">FBM016-059</a> | <a href="#">PBCN11059</a> | 10.8 | 270   | 540 |
|         | IPE1560 | <a href="#">FBM016-060</a> | <a href="#">PBCN11060</a> | 5.1  | 127.5 | 255 |
| WPE0521 | IPE1561 | <a href="#">FBM016-061</a> | <a href="#">PBCN11061</a> | 10.2 | 255   | 510 |
|         | IPE1562 | <a href="#">FBM016-062</a> | <a href="#">PBCN11062</a> | 6.6  | 165   | 330 |
|         | IPE1563 | <a href="#">FBM016-063</a> | <a href="#">PBCN11063</a> | 7.0  | 175   | 350 |
| WPE0522 | IPE1564 | <a href="#">FBM016-064</a> | <a href="#">PBCN11064</a> | 8.9  | 222.5 | 445 |
|         | IPE1565 | <a href="#">FBM016-065</a> | <a href="#">PBCN11065</a> | 9.1  | 227.5 | 455 |
|         | IPE1566 | <a href="#">FBM016-066</a> | <a href="#">PBCN11066</a> | 8.1  | 202.5 | 405 |
| WPE0523 | IPE1567 | <a href="#">FBM016-067</a> | <a href="#">PBCN11067</a> | 2.0  | 50    | 100 |
|         | IPE1568 | <a href="#">FBM016-068</a> | <a href="#">PBCN11068</a> | 8.5  | 212.5 | 425 |
|         | IPE1569 | <a href="#">FBM016-069</a> | <a href="#">PBCN11069</a> | 6.4  | 160   | 320 |
| WPE0524 | IPE1570 | <a href="#">FBM016-070</a> | <a href="#">PBCN11070</a> | 5.5  | 137.5 | 275 |
|         | IPE1571 | <a href="#">FBM016-071</a> | <a href="#">PBCN11071</a> | 6.5  | 162.5 | 325 |
|         | IPE1572 | <a href="#">FBM016-072</a> | <a href="#">PBCN11072</a> | 4.8  | 120   | 240 |
| WPE0525 | IPE1573 | <a href="#">FBM016-073</a> | <a href="#">PBCN11073</a> | 4.6  | 115   | 230 |
|         | IPE1574 | <a href="#">FBM016-074</a> | <a href="#">PBCN11074</a> | 5.7  | 142.5 | 285 |
|         | IPE1575 | <a href="#">FBM016-075</a> | <a href="#">PBCN11075</a> | 4.1  | 102.5 | 205 |
| WPE0526 | IPE1576 | <a href="#">FBM016-076</a> | <a href="#">PBCN11076</a> | 4.4  | 110   | 220 |
|         | IPE1577 | <a href="#">FBM016-077</a> | <a href="#">PBCN11077</a> | 6.8  | 170   | 340 |
|         | IPE1578 | <a href="#">FBM016-078</a> | <a href="#">PBCN11078</a> | 6.7  | 167.5 | 335 |
| WPE0527 | IPE1579 | <a href="#">FBM016-079</a> | <a href="#">PBCN11079</a> | 6.9  | 172.5 | 345 |
|         | IPE1580 | <a href="#">FBM016-080</a> | <a href="#">PBCN11080</a> | 10.5 | 262.5 | 525 |
|         | IPE1581 | <a href="#">FBM016-081</a> | <a href="#">PBCN11081</a> | 7.7  | 192.5 | 385 |
| WPE0528 | IPE1582 | <a href="#">FBM016-082</a> | <a href="#">PBCN11082</a> | 5.3  | 132.5 | 265 |
|         | IPE1583 | <a href="#">FBM016-083</a> | <a href="#">PBCN11083</a> | 7.0  | 175   | 350 |
|         | IPE1584 | <a href="#">FBM016-084</a> | <a href="#">PBCN11084</a> | 7.3  | 182.5 | 365 |
| WPE0529 | IPE1585 | <a href="#">FBM016-085</a> | <a href="#">PBCN11085</a> | 9.0  | 225   | 450 |
|         | IPE1586 | <a href="#">FBM016-086</a> | <a href="#">PBCN11086</a> | 7.2  | 180   | 360 |
|         | IPE1587 | <a href="#">FBM016-087</a> | <a href="#">PBCN11087</a> | 4.7  | 117.5 | 235 |
| WPE0530 | IPE1588 | <a href="#">FBM016-088</a> | <a href="#">PBCN11088</a> | 7.3  | 182.5 | 365 |
|         | IPE1589 | <a href="#">FBM016-089</a> | <a href="#">PBCN11089</a> | 6.9  | 172.5 | 345 |
|         | IPE1590 | <a href="#">FBM016-090</a> | <a href="#">PBCN11090</a> | 9.2  | 230   | 460 |
| WPE0531 | IPE1591 | <a href="#">FBM016-091</a> | <a href="#">PBCN11091</a> | 9.8  | 245   | 490 |
|         | IPE1592 | <a href="#">FBM016-092</a> | <a href="#">PBCN11092</a> | 3.0  | 75    | 150 |
|         | IPE1593 | <a href="#">FBM016-093</a> | <a href="#">PBCN11093</a> | 2.7  | 67.5  | 135 |
| WPE0532 | IPE1594 | <a href="#">FBM016-094</a> | <a href="#">PBCN11094</a> | 3.5  | 87.5  | 175 |

|         |         |                            |                           |      |       |     |
|---------|---------|----------------------------|---------------------------|------|-------|-----|
|         | IPE1595 | <a href="#">FBM016-095</a> | <a href="#">PBCN11095</a> | 5.3  | 132.5 | 265 |
|         | IPE1596 | <a href="#">FBM016-096</a> | <a href="#">PBCN11096</a> | 4.7  | 117.5 | 235 |
| WPE0533 | IPE1597 | <a href="#">FBM016-097</a> | <a href="#">PBCN11097</a> | 7.5  | 187.5 | 375 |
|         | IPE1598 | <a href="#">FBM016-098</a> | <a href="#">PBCN11098</a> | 5.6  | 140   | 280 |
|         | IPE1599 | <a href="#">FBM016-099</a> | <a href="#">PBCN11099</a> | 6.5  | 162.5 | 325 |
| WPE0534 | IPE1600 | <a href="#">FBM016-100</a> | <a href="#">PBCN11100</a> | 8.0  | 200   | 400 |
|         | IPE1601 | <a href="#">FBM017-001</a> | <a href="#">PBVN10033</a> | 6.9  | 172.5 | 345 |
|         | IPE1602 | <a href="#">FBM017-002</a> | <a href="#">PBVN10164</a> | 5.8  | 145   | 290 |
| WPE0535 | IPE1603 | <a href="#">FBM017-003</a> | <a href="#">PBVN10025</a> | 3.6  | 90    | 180 |
|         | IPE1604 | <a href="#">FBM017-004</a> | <a href="#">PBVN10094</a> | 4.5  | 112.5 | 225 |
|         | IPE1605 | <a href="#">FBM017-005</a> | <a href="#">PBVN10068</a> | 8.3  | 207.5 | 415 |
| WPE0536 | IPE1606 | <a href="#">FBM017-006</a> | <a href="#">PBVN10195</a> | 8.8  | 220   | 440 |
|         | IPE1607 | <a href="#">FBM017-007</a> | <a href="#">PBVN10001</a> | 4.8  | 120   | 240 |
|         | IPE1608 | <a href="#">FBM017-008</a> | <a href="#">PBVN10044</a> | 13.3 | 332.5 | 665 |
| WPE0537 | IPE1609 | <a href="#">FBM017-009</a> | <a href="#">PBVN10109</a> | 7.5  | 187.5 | 375 |
|         | IPE1610 | <a href="#">FBM017-010</a> | <a href="#">PBVN10166</a> | 8.1  | 202.5 | 405 |
|         | IPE1611 | <a href="#">FBM017-011</a> | <a href="#">PBVN10198</a> | 8.9  | 222.5 | 445 |
| WPE0538 | IPE1612 | <a href="#">FBM017-012</a> | <a href="#">PBVN10116</a> | 4.3  | 107.5 | 215 |
|         | IPE1613 | <a href="#">FBM017-013</a> | <a href="#">PBVN10117</a> | 4.3  | 107.5 | 215 |
|         | IPE1614 | <a href="#">FBM017-014</a> | <a href="#">PBVN10132</a> | 3.4  | 85    | 170 |
| WPE0539 | IPE1615 | <a href="#">FBM017-015</a> | <a href="#">PBVN10026</a> | 7.0  | 175   | 350 |
|         | IPE1616 | <a href="#">FBM017-016</a> | <a href="#">PBVN10165</a> | 7.4  | 185   | 370 |
|         | IPE1617 | <a href="#">FBM017-017</a> | <a href="#">PBVN10179</a> | 8.9  | 222.5 | 445 |
| WPE0540 | IPE1618 | <a href="#">FBM017-018</a> | <a href="#">PBVN10072</a> | 8.7  | 217.5 | 435 |
|         | IPE1619 | <a href="#">FBM017-019</a> | <a href="#">PBVN10029</a> | 6.9  | 172.5 | 345 |
|         | IPE1620 | <a href="#">FBM017-020</a> | <a href="#">PBVN10170</a> | 5.5  | 137.5 | 275 |
| WPE0541 | IPE1621 | <a href="#">FBM017-021</a> | <a href="#">PBVN10043</a> | 7.1  | 177.5 | 355 |
|         | IPE1622 | <a href="#">FBM017-022</a> | <a href="#">PBVN10076</a> | 8.2  | 205   | 410 |
|         | IPE1623 | <a href="#">FBM017-023</a> | <a href="#">PBVN10040</a> | 11.9 | 297.5 | 595 |
| WPE0542 | IPE1624 | <a href="#">FBM017-024</a> | <a href="#">PBVN10167</a> | 5.3  | 132.5 | 265 |
|         | IPE1625 | <a href="#">FBM017-025</a> | <a href="#">PBVN10152</a> | 6.4  | 160   | 320 |
|         | IPE1626 | <a href="#">FBM017-026</a> | <a href="#">PBVN10160</a> | 9.4  | 235   | 470 |
| WPE0543 | IPE1627 | <a href="#">FBM017-027</a> | <a href="#">PBVN10085</a> | 4.7  | 117.5 | 235 |
|         | IPE1628 | <a href="#">FBM017-028</a> | <a href="#">PBVN10078</a> | 6.9  | 172.5 | 345 |
|         | IPE1629 | <a href="#">FBM017-029</a> | <a href="#">PBVN10041</a> | 11.5 | 287.5 | 575 |
| WPE0544 | IPE1630 | <a href="#">FBM017-030</a> | <a href="#">PBVN10030</a> | 15.0 | 375   | 750 |
|         | IPE1631 | <a href="#">FBM017-031</a> | <a href="#">PBVN10146</a> | 7.1  | 177.5 | 355 |
|         | IPE1632 | <a href="#">FBM017-032</a> | <a href="#">PBVN10019</a> | 8.4  | 210   | 420 |
| WPE0545 | IPE1633 | <a href="#">FBM017-033</a> | <a href="#">PBVN10021</a> | 10.5 | 262.5 | 525 |
|         | IPE1634 | <a href="#">FBM017-034</a> | <a href="#">PBVN10177</a> | 7.3  | 182.5 | 365 |

|         |         |                            |                           |      |       |     |
|---------|---------|----------------------------|---------------------------|------|-------|-----|
|         | IPE1635 | <a href="#">FBM017-035</a> | <a href="#">PBVN10096</a> | 8.2  | 205   | 410 |
| WPE0546 | IPE1636 | <a href="#">FBM017-036</a> | <a href="#">PBVN10171</a> | 14.4 | 360   | 720 |
|         | IPE1637 | <a href="#">FBM017-037</a> | <a href="#">PBVN10023</a> | 9.5  | 237.5 | 475 |
|         | IPE1638 | <a href="#">FBM017-038</a> | <a href="#">PBVN10101</a> | 8.4  | 210   | 420 |
| WPE0547 | IPE1639 | <a href="#">FBM017-039</a> | <a href="#">PBVN10013</a> | 6.1  | 152.5 | 305 |
|         | IPE1640 | <a href="#">FBM017-040</a> | <a href="#">PBVN10017</a> | 9.1  | 227.5 | 455 |
|         | IPE1641 | <a href="#">FBM017-041</a> | <a href="#">PBVN10010</a> | 9.5  | 237.5 | 475 |
| WPE0548 | IPE1642 | <a href="#">FBM017-042</a> | <a href="#">PBVN10016</a> | 4.2  | 105   | 210 |
|         | IPE1643 | <a href="#">FBM017-043</a> | <a href="#">PBVN10092</a> | 7.1  | 177.5 | 355 |
|         | IPE1644 | <a href="#">FBM017-044</a> | <a href="#">PBVN10095</a> | 4.8  | 120   | 240 |
| WPE0549 | IPE1645 | <a href="#">FBM017-045</a> | <a href="#">PBVN10014</a> | 5.4  | 135   | 270 |
|         | IPE1646 | <a href="#">FBM017-046</a> | <a href="#">PBVN10112</a> | 6.2  | 155   | 310 |
|         | IPE1647 | <a href="#">FBM017-047</a> | <a href="#">PBVN10052</a> | 6.3  | 157.5 | 315 |
| WPE0550 | IPE1648 | <a href="#">FBM017-048</a> | <a href="#">PBVN10125</a> | 7.1  | 177.5 | 355 |
|         | IPE1649 | <a href="#">FBM017-049</a> | <a href="#">PBVN10042</a> | 4.9  | 122.5 | 245 |
|         | IPE1650 | <a href="#">FBM017-050</a> | <a href="#">PBVN10107</a> | 12.3 | 307.5 | 615 |
| WPE0551 | IPE1651 | <a href="#">FBM017-051</a> | <a href="#">PBVN10039</a> | 7.4  | 185   | 370 |
|         | IPE1652 | <a href="#">FBM017-052</a> | <a href="#">PBVN10187</a> | 5.7  | 142.5 | 285 |
|         | IPE1653 | <a href="#">FBM017-053</a> | <a href="#">PBVN10191</a> | 10.2 | 255   | 510 |
| WPE0552 | IPE1654 | <a href="#">FBM017-054</a> | <a href="#">PBVN10180</a> | 7.0  | 175   | 350 |
|         | IPE1655 | <a href="#">FBM017-055</a> | <a href="#">PBVN10049</a> | 4.1  | 102.5 | 205 |
|         | IPE1656 | <a href="#">FBM017-056</a> | <a href="#">PBVN10034</a> | 10.5 | 262.5 | 525 |
| WPE0553 | IPE1657 | <a href="#">FBM017-057</a> | <a href="#">PBVN10004</a> | 4.5  | 112.5 | 225 |
|         | IPE1658 | <a href="#">FBM017-058</a> | <a href="#">PBVN10020</a> | 10.5 | 262.5 | 525 |
|         | IPE1659 | <a href="#">FBM017-059</a> | <a href="#">PBVN10193</a> | 8.1  | 202.5 | 405 |
| WPE0554 | IPE1660 | <a href="#">FBM017-060</a> | <a href="#">PBVN10188</a> | 4.5  | 112.5 | 225 |
|         | IPE1661 | <a href="#">FBM017-061</a> | <a href="#">PBVN10190</a> | 4.6  | 115   | 230 |
|         | IPE1662 | <a href="#">FBM017-062</a> | <a href="#">PBVN10196</a> | 9.1  | 227.5 | 455 |
| WPE0555 | IPE1663 | <a href="#">FBM017-063</a> | <a href="#">PBVN10046</a> | 5.8  | 145   | 290 |
|         | IPE1664 | <a href="#">FBM017-064</a> | <a href="#">PBVN10174</a> | 7.6  | 190   | 380 |
|         | IPE1665 | <a href="#">FBM017-065</a> | <a href="#">PBVN10178</a> | 4.8  | 120   | 240 |
| WPE0556 | IPE1666 | <a href="#">FBM017-066</a> | <a href="#">PBVN10119</a> | 6.7  | 167.5 | 335 |
|         | IPE1667 | <a href="#">FBM017-067</a> | <a href="#">PBVN10031</a> | 7.2  | 180   | 360 |
|         | IPE1668 | <a href="#">FBM017-068</a> | <a href="#">PBVN10028</a> | 5.5  | 137.5 | 275 |
| WPE0557 | IPE1669 | <a href="#">FBM017-069</a> | <a href="#">PBVN10142</a> | 11.9 | 297.5 | 595 |
|         | IPE1670 | <a href="#">FBM017-070</a> | <a href="#">PBVN10175</a> | 7.9  | 197.5 | 395 |
|         | IPE1671 | <a href="#">FBM017-071</a> | <a href="#">PBVN10120</a> | 7.9  | 197.5 | 395 |
| WPE0558 | IPE1672 | <a href="#">FBM017-072</a> | <a href="#">PBVN10032</a> | 9.2  | 230   | 460 |
|         | IPE1673 | <a href="#">FBM017-073</a> | <a href="#">PBVN10027</a> | 7.7  | 192.5 | 385 |
|         | IPE1674 | <a href="#">FBM017-074</a> | <a href="#">PBVN10185</a> | 6.2  | 155   | 310 |

|         |         |                            |                           |         |        |        |
|---------|---------|----------------------------|---------------------------|---------|--------|--------|
| WPE0559 | IPE1675 | <a href="#">FBM017-075</a> | <a href="#">PBVN10012</a> | 7.5     | 187.5  | 375    |
|         | IPE1676 | <a href="#">FBM017-076</a> | <a href="#">PBVN10203</a> | 7.6     | 190    | 380    |
|         | IPE1677 | <a href="#">FBM017-077</a> | <a href="#">PBVN10007</a> | 4.4     | 110    | 220    |
| WPE0560 | IPE1678 | <a href="#">FBM017-078</a> | <a href="#">PBVN10011</a> | 6.2     | 155    | 310    |
|         | IPE1679 | <a href="#">FBM017-079</a> | <a href="#">PBVN10176</a> | 9.4     | 235    | 470    |
|         | IPE1680 | <a href="#">FBM017-080</a> | <a href="#">PBVN10197</a> | 7.7     | 192.5  | 385    |
| WPE0561 | IPE1681 | <a href="#">FBM017-081</a> | <a href="#">PBVN10036</a> | 4.7     | 117.5  | 235    |
|         | IPE1682 | <a href="#">FBM017-082</a> | <a href="#">PBVN10024</a> | 13.1    | 327.5  | 655    |
|         | IPE1683 | <a href="#">FBM017-083</a> | <a href="#">PBVN10194</a> | 6.5     | 162.5  | 325    |
| WPE0562 | IPE1684 | <a href="#">FBM017-084</a> | <a href="#">PBVN10148</a> | 5.4     | 135    | 270    |
|         | IPE1685 | <a href="#">FBM017-085</a> | <a href="#">PBVN10147</a> | 9.0     | 225    | 450    |
|         | IPE1686 | <a href="#">FBM017-086</a> | <a href="#">PBVN10168</a> | 4.1     | 102.5  | 205    |
| WPE0563 | IPE1687 | <a href="#">FBM017-087</a> | <a href="#">PBVN10199</a> | 5.0     | 125    | 250    |
|         | IPE1688 | <a href="#">FBM017-088</a> | <a href="#">PBVN10008</a> | 11.7    | 292.5  | 585    |
|         | IPE1689 | <a href="#">FBM017-089</a> | <a href="#">PBVN10192</a> | 9.8     | 245    | 490    |
| WPE0564 | IPE1690 | <a href="#">FBM017-090</a> | <a href="#">PBVN10183</a> | 14.1    | 352.5  | 705    |
|         | IPE1691 | <a href="#">FBM017-091</a> | <a href="#">PBVN10018</a> | 7.2     | 180    | 360    |
|         | IPE1692 | <a href="#">FBM017-092</a> | <a href="#">PBVN10098</a> | 6.4     | 160    | 320    |
| WPE0565 | IPE1693 | <a href="#">FBM017-093</a> | <a href="#">PBVN10126</a> | 5.5     | 137.5  | 275    |
|         | IPE1694 | <a href="#">FBM017-094</a> | <a href="#">PBVN10097</a> | 9.5     | 237.5  | 475    |
|         | IPE1695 | <a href="#">FBM017-095</a> | <a href="#">PBVN10038</a> | 6.3     | 157.5  | 315    |
| WPE0566 | IPE1696 | <a href="#">FBM017-096</a> | <a href="#">PBVN10045</a> | -1049.8 | -26245 | -52490 |
|         | IPE1697 | <a href="#">FBM017-097</a> | <a href="#">PBVN10106</a> | 3.8     | 95     | 190    |
|         | IPE1698 | <a href="#">FBM017-098</a> | <a href="#">PBVN10204</a> | 7.2     | 180    | 360    |
| WPE0567 | IPE1699 | <a href="#">FBM017-099</a> | <a href="#">PBVN10205</a> | 9.4     | 235    | 470    |
|         | IPE1700 | <a href="#">FBM017-100</a> | <a href="#">PBVN10206</a> | 4.6     | 115    | 230    |
|         | IPE1701 | <a href="#">FBM018-001</a> | <a href="#">PBVN10121</a> | 7.5     | 187.5  | 375    |
| WPE0568 | IPE1702 | <a href="#">FBM018-002</a> | <a href="#">PBVN10111</a> | 4.2     | 105    | 210    |
|         | IPE1703 | <a href="#">FBM018-003</a> | <a href="#">PBVN10200</a> | 4.7     | 117.5  | 235    |
|         | IPE1704 | <a href="#">FBM018-004</a> | <a href="#">PBVN10047</a> | 10.6    | 265    | 530    |
| WPE0569 | IPE1705 | <a href="#">FBM018-005</a> | <a href="#">PBVN10055</a> | 7.0     | 175    | 350    |
|         | IPE1706 | <a href="#">FBM018-006</a> | <a href="#">PBVN10115</a> | 4.7     | 117.5  | 235    |
|         | IPE1707 | <a href="#">FBM018-007</a> | <a href="#">PBVN10158</a> | 7.3     | 182.5  | 365    |
| WPE0570 | IPE1708 | <a href="#">FBM018-008</a> | <a href="#">PBVN10054</a> | 2.9     | 72.5   | 145    |
|         | IPE1709 | <a href="#">FBM018-009</a> | <a href="#">PBVN10157</a> | 3.5     | 87.5   | 175    |
|         | IPE1710 | <a href="#">FBM018-010</a> | <a href="#">PBVN10133</a> | 6.0     | 150    | 300    |
| WPE0571 | IPE1711 | <a href="#">FBM018-011</a> | <a href="#">PBVN10154</a> | 4.4     | 110    | 220    |
|         | IPE1712 | <a href="#">FBM018-012</a> | <a href="#">PBVN10058</a> | 5.9     | 147.5  | 295    |
|         | IPE1713 | <a href="#">FBM018-013</a> | <a href="#">PBVN10129</a> | 7.2     | 180    | 360    |
| WPE0572 | IPE1714 | <a href="#">FBM018-014</a> | <a href="#">PBVN10050</a> | 7.9     | 197.5  | 395    |

|         |         |                            |                           |      |       |     |
|---------|---------|----------------------------|---------------------------|------|-------|-----|
|         | IPE1715 | <a href="#">FBM018-015</a> | <a href="#">PBVN10181</a> | 7.5  | 187.5 | 375 |
|         | IPE1716 | <a href="#">FBM018-016</a> | <a href="#">PBVN10202</a> | 4.9  | 122.5 | 245 |
| WPE0573 | IPE1717 | <a href="#">FBM018-017</a> | <a href="#">PBVN10073</a> | 5.8  | 145   | 290 |
|         | IPE1718 | <a href="#">FBM018-018</a> | <a href="#">PBVN10108</a> | 7.1  | 177.5 | 355 |
|         | IPE1719 | <a href="#">FBM018-019</a> | <a href="#">PBVN10161</a> | 3.4  | 85    | 170 |
| WPE0574 | IPE1720 | <a href="#">FBM018-020</a> | <a href="#">PBVN10110</a> | 8.7  | 217.5 | 435 |
|         | IPE1721 | <a href="#">FBM018-021</a> | <a href="#">PBVN10074</a> | 5.1  | 127.5 | 255 |
|         | IPE1722 | <a href="#">FBM018-022</a> | <a href="#">PBVN10169</a> | 2.7  | 67.5  | 135 |
| WPE0575 | IPE1723 | <a href="#">FBM018-023</a> | <a href="#">PBVN10137</a> | 5.4  | 135   | 270 |
|         | IPE1724 | <a href="#">FBM018-024</a> | <a href="#">PBVN10156</a> | 4.1  | 102.5 | 205 |
|         | IPE1725 | <a href="#">FBM018-025</a> | <a href="#">PBVN10136</a> | 6.6  | 165   | 330 |
| WPE0576 | IPE1726 | <a href="#">FBM018-026</a> | <a href="#">PBVN10104</a> | 6.2  | 155   | 310 |
|         | IPE1727 | <a href="#">FBM018-027</a> | <a href="#">PBVN10053</a> | 5.7  | 142.5 | 285 |
|         | IPE1728 | <a href="#">FBM018-028</a> | <a href="#">PBVN10037</a> | 6.7  | 167.5 | 335 |
| WPE0577 | IPE1729 | <a href="#">FBM018-029</a> | <a href="#">PBVN10064</a> | 4.8  | 120   | 240 |
|         | IPE1730 | <a href="#">FBM018-030</a> | <a href="#">PBVN10099</a> | 6.1  | 152.5 | 305 |
|         | IPE1731 | <a href="#">FBM018-031</a> | <a href="#">PBVN10005</a> | 6.1  | 152.5 | 305 |
| WPE0578 | IPE1732 | <a href="#">FBM018-032</a> | <a href="#">PBVN10051</a> | 5.5  | 137.5 | 275 |
|         | IPE1733 | <a href="#">FBM018-033</a> | <a href="#">PBVN10087</a> | 5.7  | 142.5 | 285 |
|         | IPE1734 | <a href="#">FBM018-034</a> | <a href="#">PBVN10066</a> | 3.9  | 97.5  | 195 |
| WPE0579 | IPE1735 | <a href="#">FBM018-035</a> | <a href="#">PBVN10089</a> | 9.3  | 232.5 | 465 |
|         | IPE1736 | <a href="#">FBM018-036</a> | <a href="#">PBVN10130</a> | 4.3  | 107.5 | 215 |
|         | IPE1737 | <a href="#">FBM018-037</a> | <a href="#">PBVN10075</a> | 3.5  | 87.5  | 175 |
| WPE0580 | IPE1738 | <a href="#">FBM018-038</a> | <a href="#">PBVN10062</a> | 7.5  | 187.5 | 375 |
|         | IPE1739 | <a href="#">FBM018-039</a> | <a href="#">PBVN10056</a> | 4.6  | 115   | 230 |
|         | IPE1740 | <a href="#">FBM018-040</a> | <a href="#">PBVN10071</a> | 4.0  | 100   | 200 |
| WPE0581 | IPE1741 | <a href="#">FBM018-041</a> | <a href="#">PBVN10067</a> | 5.0  | 125   | 250 |
|         | IPE1742 | <a href="#">FBM018-042</a> | <a href="#">PBVN10069</a> | 5.1  | 127.5 | 255 |
|         | IPE1743 | <a href="#">FBM018-043</a> | <a href="#">PBVN10059</a> | 6.9  | 172.5 | 345 |
| WPE0582 | IPE1744 | <a href="#">FBM018-044</a> | <a href="#">PBVN10086</a> | 5.7  | 142.5 | 285 |
|         | IPE1745 | <a href="#">FBM018-045</a> | <a href="#">PBVN10083</a> | 5.6  | 140   | 280 |
|         | IPE1746 | <a href="#">FBM018-046</a> | <a href="#">PBVN10131</a> | 5.7  | 142.5 | 285 |
| WPE0583 | IPE1747 | <a href="#">FBM018-047</a> | <a href="#">PBVN10128</a> | 7.1  | 177.5 | 355 |
|         | IPE1748 | <a href="#">FBM018-048</a> | <a href="#">PBVN10048</a> | 4.1  | 102.5 | 205 |
|         | IPE1749 | <a href="#">FBM018-049</a> | <a href="#">PBVN10063</a> | 7.6  | 190   | 380 |
| WPE0584 | IPE1750 | <a href="#">FBM018-050</a> | <a href="#">PBVN10123</a> | 4.4  | 110   | 220 |
|         | IPE1751 | <a href="#">FBM018-051</a> | <a href="#">PBVN10201</a> | 16.3 | 407.5 | 815 |
|         | IPE1752 | <a href="#">FBM018-052</a> | <a href="#">PBVN10145</a> | 8.6  | 215   | 430 |
| WPE0585 | IPE1753 | <a href="#">FBM018-053</a> | <a href="#">PBVN10077</a> | 8.4  | 210   | 420 |
|         | IPE1754 | <a href="#">FBM018-054</a> | <a href="#">PBVN10189</a> | 4.9  | 122.5 | 245 |

|         |         |                            |                           |      |       |     |
|---------|---------|----------------------------|---------------------------|------|-------|-----|
|         | IPE1755 | <a href="#">FBM018-055</a> | <a href="#">PBVN10081</a> | 6.9  | 172.5 | 345 |
| WPE0586 | IPE1756 | <a href="#">FBM018-056</a> | <a href="#">PBVN10173</a> | 6.0  | 150   | 300 |
|         | IPE1757 | <a href="#">FBM018-057</a> | <a href="#">PBVN10088</a> | 8.7  | 217.5 | 435 |
|         | IPE1758 | <a href="#">FBM018-058</a> | <a href="#">PBVN10035</a> | 5.5  | 137.5 | 275 |
| WPE0587 | IPE1759 | <a href="#">FBM018-059</a> | <a href="#">PBVN10065</a> | 10.5 | 262.5 | 525 |
|         | IPE1760 | <a href="#">FBM018-060</a> | <a href="#">PBVN10015</a> | 7.3  | 182.5 | 365 |
|         | IPE1761 | <a href="#">FBM018-061</a> | <a href="#">PBVN10091</a> | 4.6  | 115   | 230 |
| WPE0588 | IPE1762 | <a href="#">FBM018-062</a> | <a href="#">PBVN10149</a> | 10.5 | 262.5 | 525 |
|         | IPE1763 | <a href="#">FBM018-063</a> | <a href="#">PBVN10151</a> | 4.2  | 105   | 210 |
|         | IPE1764 | <a href="#">FBM018-064</a> | <a href="#">PBVN10090</a> | 6.2  | 155   | 310 |
| WPE0589 | IPE1765 | <a href="#">FBM018-065</a> | <a href="#">PBVN10060</a> | 7.7  | 192.5 | 385 |
|         | IPE1766 | <a href="#">FBM018-066</a> | <a href="#">PBVN10079</a> | 9.9  | 247.5 | 495 |
|         | IPE1767 | <a href="#">FBM018-067</a> | <a href="#">PBVN10061</a> | 9.0  | 225   | 450 |
| WPE0590 | IPE1768 | <a href="#">FBM018-068</a> | <a href="#">PBVN10080</a> | 8.6  | 215   | 430 |
|         | IPE1769 | <a href="#">FBM018-069</a> | <a href="#">PBVN10113</a> | 6.0  | 150   | 300 |
|         | IPE1770 | <a href="#">FBM018-070</a> | <a href="#">PBVN10084</a> | 7.5  | 187.5 | 375 |
| WPE0591 | IPE1771 | <a href="#">FBM018-071</a> | <a href="#">PBVN10003</a> | 7.8  | 195   | 390 |
|         | IPE1772 | <a href="#">FBM018-072</a> | <a href="#">PBVN10006</a> | 3.3  | 82.5  | 165 |
|         | IPE1773 | <a href="#">FBM018-073</a> | <a href="#">PBVN10093</a> | 6.3  | 157.5 | 315 |
| WPE0592 | IPE1774 | <a href="#">FBM018-074</a> | <a href="#">PBVN10022</a> | 6.1  | 152.5 | 305 |
|         | IPE1775 | <a href="#">FBM018-075</a> | <a href="#">PBVN10100</a> | 4.8  | 120   | 240 |
|         | IPE1776 | <a href="#">FBM018-076</a> | <a href="#">PBVN10163</a> | 10.7 | 267.5 | 535 |
| WPE0593 | IPE1777 | <a href="#">FBM018-077</a> | <a href="#">PBVN10009</a> | 5.4  | 135   | 270 |
|         | IPE1778 | <a href="#">FBM018-078</a> | <a href="#">PBVN10184</a> | 5.4  | 135   | 270 |
|         | IPE1779 | <a href="#">FBM018-079</a> | <a href="#">PBVN10159</a> | 4.9  | 122.5 | 245 |
| WPE0594 | IPE1780 | <a href="#">FBM018-080</a> | <a href="#">PBVN10134</a> | 4.4  | 110   | 220 |
|         | IPE1781 | <a href="#">FBM018-081</a> | <a href="#">PBVN10127</a> | 7.4  | 185   | 370 |
|         | IPE1782 | <a href="#">FBM018-082</a> | <a href="#">PBVN10144</a> | 7.4  | 185   | 370 |
| WPE0595 | IPE1783 | <a href="#">FBM018-083</a> | <a href="#">PBVN10002</a> | 9.1  | 227.5 | 455 |
|         | IPE1784 | <a href="#">FBM018-084</a> | <a href="#">PBVN10102</a> | 6.9  | 172.5 | 345 |
|         | IPE1785 | <a href="#">FBM018-085</a> | <a href="#">PBVN10140</a> | 4.3  | 107.5 | 215 |
| WPE0596 | IPE1786 | <a href="#">FBM018-086</a> | <a href="#">PBVN10124</a> | 8.0  | 200   | 400 |
|         | IPE1787 | <a href="#">FBM018-087</a> | <a href="#">PBVN10135</a> | 4.4  | 110   | 220 |
|         | IPE1788 | <a href="#">FBM018-088</a> | <a href="#">PBVN10182</a> | 4.0  | 100   | 200 |
| WPE0597 | IPE1789 | <a href="#">FBM018-089</a> | <a href="#">PBVN10103</a> | 7.6  | 190   | 380 |
|         | IPE1790 | <a href="#">FBM018-090</a> | <a href="#">PBVN10118</a> | 5.4  | 135   | 270 |
|         | IPE1791 | <a href="#">FBM018-091</a> | <a href="#">PBVN10082</a> | 6.9  | 172.5 | 345 |
| WPE0598 | IPE1792 | <a href="#">FBM018-092</a> | <a href="#">PBVN10150</a> | 5.7  | 142.5 | 285 |
|         | IPE1793 | <a href="#">FBM018-093</a> | <a href="#">PBVN10186</a> | 5.7  | 142.5 | 285 |
|         | IPE1794 | <a href="#">FBM018-094</a> | <a href="#">PBVN10139</a> | 6.9  | 172.5 | 345 |

|         |         |                            |                           |            |            |            |
|---------|---------|----------------------------|---------------------------|------------|------------|------------|
| WPE0599 | IPE1795 | <a href="#">FBM018-095</a> | <a href="#">PBVN10141</a> | 5.5        | 137.5      | 275        |
|         | IPE1796 | <a href="#">FBM018-096</a> | <a href="#">PBVN10105</a> | 6.9        | 172.5      | 345        |
|         | IPE1797 | <a href="#">FBM018-097</a> | <a href="#">PBVN10138</a> | <b>4.6</b> | <b>115</b> | <b>230</b> |
| WPE0600 | IPE1798 | <a href="#">FBM018-098</a> | <a href="#">PBVN10114</a> | 6.5        | 162.5      | 325        |
|         | IPE1799 | <a href="#">FBM018-099</a> | <a href="#">PBVN10057</a> | 7.8        | 195        | 390        |
|         | IPE1800 | <a href="#">FBM018-100</a> | <a href="#">PBVN10122</a> | 4.6        | 115        | 230        |
| WPE0601 | IPE1801 | <a href="#">FBM019-001</a> | <a href="#">PBNG10079</a> | 8.7        | 217.5      | 435        |
|         | IPE1802 | <a href="#">FBM019-002</a> | <a href="#">PBNG10081</a> | -1043.7    | -26092.5   | -52185     |
|         | IPE1803 | <a href="#">FBM019-003</a> | <a href="#">PBNG10064</a> | 4.3        | 107.5      | 215        |
| WPE0602 | IPE1804 | <a href="#">FBM019-004</a> | <a href="#">PBNG10024</a> | 7.7        | 192.5      | 385        |
|         | IPE1805 | <a href="#">FBM019-005</a> | <a href="#">PBNG10111</a> | 4.2        | 105        | 210        |
|         | IPE1806 | <a href="#">FBM019-006</a> | <a href="#">PBNG10071</a> | 4.8        | 120        | 240        |
| WPE0603 | IPE1807 | <a href="#">FBM019-007</a> | <a href="#">PBNG10052</a> | 8.5        | 212.5      | 425        |
|         | IPE1808 | <a href="#">FBM019-008</a> | <a href="#">PBNG10125</a> | 7.2        | 180        | 360        |
|         | IPE1809 | <a href="#">FBM019-009</a> | <a href="#">PBNG10043</a> | 4.0        | 100        | 200        |
| WPE0604 | IPE1810 | <a href="#">FBM019-010</a> | <a href="#">PBNG10194</a> | 5.8        | 145        | 290        |
|         | IPE1811 | <a href="#">FBM019-011</a> | <a href="#">PBNG10038</a> | 7.1        | 177.5      | 355        |
|         | IPE1812 | <a href="#">FBM019-012</a> | <a href="#">PBNG10191</a> | 16.7       | 417.5      | 835        |
| WPE0605 | IPE1813 | <a href="#">FBM019-013</a> | <a href="#">PBNG10060</a> | 5.1        | 127.5      | 255        |
|         | IPE1814 | <a href="#">FBM019-014</a> | <a href="#">PBNG10092</a> | 11.0       | 275        | 550        |
|         | IPE1815 | <a href="#">FBM019-015</a> | <a href="#">PBNG10115</a> | 6.2        | 155        | 310        |
| WPE0606 | IPE1816 | <a href="#">FBM019-016</a> | <a href="#">PBNG10175</a> | 7.3        | 182.5      | 365        |
|         | IPE1817 | <a href="#">FBM019-017</a> | <a href="#">PBNG10074</a> | 3.6        | 90         | 180        |
|         | IPE1818 | <a href="#">FBM019-018</a> | <a href="#">PBNG10050</a> | 5.7        | 142.5      | 285        |
| WPE0607 | IPE1819 | <a href="#">FBM019-019</a> | <a href="#">PBNG10022</a> | 6.3        | 157.5      | 315        |
|         | IPE1820 | <a href="#">FBM019-020</a> | <a href="#">PBNG10029</a> | 6.0        | 150        | 300        |
